# Supplementary material for: A non-linear mixed effect model for innate immune response: In vivo kinetics of endotoxin and its induction of the cytokines tumor necrosis factor alpha and interleukin-6
Source: PLoS One. 2019 Feb 21;14(2):e0211981. doi: 10.1371/journal.pone.0211981 (PMC6383944; doi:10.1371/journal.pone.0211981)
Supplement: S1 Table — Dataset used in development of the model, including information on each individuals administration of ETX and observed ETX, TNF-α and IL-6 concentrations at given times, plus any important information of the respective studies with regards to study design or similar. (CSV) [file pone.0211981.s001.csv]

ID	SID	STUDY	DGRP	AMT	AMT2	RATE	RATE2	CMT	EVID	DVID	TAD	LNDV	DV	MDV	OMIT	LLOQ	TYPE	WT	FLUID	INFL	INFR	PEXP
1	1	1	1	47.48	47480	1.978	1978	1	1	0	0	-1	-1	1	0	.	0	31.4	10	30	0	0.063
1	1	1	1	47.48	47480	1.978	1978	2	1	0	0	-1	-1	1	0	.	0	31.4	10	30	0	0.063
1	1	1	1	.	.	.	.	3	0	1	0	4.625	102	0	0	.	0	31.4	10	30	0	0.063
1	1	1	1	.	.	.	.	10	0	2	0	2.0794	8	0	0	.	0	31.4	10	30	0	0.063
1	1	1	1	.	.	.	.	3	0	1	1	5.3753	216	0	0	.	0	31.4	10	30	0	0.063
1	1	1	1	.	.	.	.	10	0	2	1	1.3863	4	0	1	.	0	31.4	10	30	0	0.063
1	1	1	1	.	.	.	.	3	0	1	2	6.6746	792	0	0	.	0	31.4	10	30	0	0.063
1	1	1	1	.	.	.	.	10	0	2	2	5.323	205	0	0	.	0	31.4	10	30	0	0.063
1	1	1	1	.	.	.	.	3	0	1	3	5.9713	392	0	0	.	0	31.4	10	30	0	0.063
1	1	1	1	.	.	.	.	10	0	2	3	4.4067	82	0	0	.	0	31.4	10	30	0	0.063
1	1	1	1	.	.	.	.	3	0	1	4	5.591	268	0	0	.	0	31.4	10	30	0	0.063
1	1	1	1	.	.	.	.	10	0	2	4	4.1744	65	0	0	.	0	31.4	10	30	0	0.063
1	1	1	1	.	.	.	.	3	0	1	5	5.4553	234	0	0	.	0	31.4	10	30	0	0.063
1	1	1	1	.	.	.	.	10	0	2	5	4.1897	66	0	0	.	0	31.4	10	30	0	0.063
1	1	1	1	.	.	.	.	3	0	1	6	5.2149	184	0	0	.	0	31.4	10	30	0	0.063
1	1	1	1	.	.	.	.	10	0	2	6	4.3567	78	0	0	.	0	31.4	10	30	0	0.063
1	1	1	1	.	.	.	.	3	0	1	7	-2	-2	1	0	.	0	31.4	10	30	0	0.063
1	1	1	1	.	.	.	.	10	0	2	7	-2	-2	1	0	.	0	31.4	10	30	0	0.063
1	1	1	1	.	.	.	.	3	0	1	8	-2	-2	1	0	.	0	31.4	10	30	0	0.063
1	1	1	1	.	.	.	.	10	0	2	8	-2	-2	1	0	.	0	31.4	10	30	0	0.063
1	1	1	1	.	.	.	.	3	0	1	9	4.6634	106	0	0	.	0	31.4	10	30	0	0.063
1	1	1	1	.	.	.	.	10	0	2	9	3.2958	27	0	0	.	0	31.4	10	30	0	0.063
1	1	1	1	.	.	.	.	3	0	1	10	-2	-2	1	0	.	0	31.4	10	30	0	0.063
1	1	1	1	.	.	.	.	10	0	2	10	-2	-2	1	0	.	0	31.4	10	30	0	0.063
1	1	1	1	.	.	.	.	3	0	1	11	-2	-2	1	0	.	0	31.4	10	30	0	0.063
1	1	1	1	.	.	.	.	10	0	2	11	-2	-2	1	0	.	0	31.4	10	30	0	0.063
1	1	1	1	.	.	.	.	3	0	1	12	4.4998	90	0	0	.	0	31.4	10	30	0	0.063
1	1	1	1	.	.	.	.	10	0	2	12	3.6889	40	0	0	.	0	31.4	10	30	0	0.063
1	1	1	1	.	.	.	.	3	0	1	13	-2	-2	1	0	.	0	31.4	10	30	0	0.063
1	1	1	1	.	.	.	.	10	0	2	13	-2	-2	1	0	.	0	31.4	10	30	0	0.063
1	1	1	1	.	.	.	.	3	0	1	14	-2	-2	1	0	.	0	31.4	10	30	0	0.063
1	1	1	1	.	.	.	.	10	0	2	14	-2	-2	1	0	.	0	31.4	10	30	0	0.063
1	1	1	1	.	.	.	.	3	0	1	15	4.2767	72	0	0	.	0	31.4	10	30	0	0.063
1	1	1	1	.	.	.	.	10	0	2	15	3.2958	27	0	0	.	0	31.4	10	30	0	0.063
1	1	1	1	.	.	.	.	3	0	1	16	-2	-2	1	0	.	0	31.4	10	30	0	0.063
1	1	1	1	.	.	.	.	10	0	2	16	-2	-2	1	0	.	0	31.4	10	30	0	0.063
1	1	1	1	.	.	.	.	3	0	1	17	-2	-2	1	0	.	0	31.4	10	30	0	0.063
1	1	1	1	.	.	.	.	10	0	2	17	-2	-2	1	0	.	0	31.4	10	30	0	0.063
1	1	1	1	.	.	.	.	3	0	1	18	4.5433	94	0	0	.	0	31.4	10	30	0	0.063
1	1	1	1	.	.	.	.	10	0	2	18	3.6889	40	0	0	.	0	31.4	10	30	0	0.063
1	1	1	1	.	.	.	.	3	0	1	19	-2	-2	1	0	.	0	31.4	10	30	0	0.063
1	1	1	1	.	.	.	.	10	0	2	19	-2	-2	1	0	.	0	31.4	10	30	0	0.063
1	1	1	1	.	.	.	.	3	0	1	20	-2	-2	1	0	.	0	31.4	10	30	0	0.063
1	1	1	1	.	.	.	.	10	0	2	20	-2	-2	1	0	.	0	31.4	10	30	0	0.063
1	1	1	1	.	.	.	.	3	0	1	21	4.4067	82	0	0	.	0	31.4	10	30	0	0.063
1	1	1	1	.	.	.	.	10	0	2	21	3.6109	37	0	0	.	0	31.4	10	30	0	0.063
1	1	1	1	.	.	.	.	3	0	1	22	-2	-2	1	0	.	0	31.4	10	30	0	0.063
1	1	1	1	.	.	.	.	10	0	2	22	-2	-2	1	0	.	0	31.4	10	30	0	0.063
1	1	1	1	.	.	.	.	3	0	1	23	-2	-2	1	0	.	0	31.4	10	30	0	0.063
1	1	1	1	.	.	.	.	10	0	2	23	-2	-2	1	0	.	0	31.4	10	30	0	0.063
1	1	1	1	188.4	188400	31.4	31400	1	1	0	24	-1	-1	1	0	.	0	31.4	10	30	0	0.063
1	1	1	1	188.4	188400	31.4	31400	2	1	0	24	-1	-1	1	0	.	0	31.4	10	30	0	0.063
1	1	1	1	.	.	.	.	3	0	1	24	4.4543	86	0	0	.	0	31.4	10	30	0	0.063
1	1	1	1	.	.	.	.	10	0	2	24	3.6376	38	0	0	.	0	31.4	10	30	0	0.063
1	1	1	1	.	.	.	.	3	0	1	25	4.9558	142	0	0	.	0	31.4	10	30	0	0.063
1	1	1	1	.	.	.	.	10	0	2	25	3.4012	30	0	0	.	0	31.4	10	30	0	0.063
1	1	1	1	.	.	.	.	3	0	1	26	5.3279	206	0	0	.	0	31.4	10	30	0	0.063
1	1	1	1	.	.	.	.	10	0	2	26	5.4381	230	0	0	.	0	31.4	10	30	0	0.063
1	1	1	1	.	.	.	.	3	0	1	27	6.1738	480	0	0	.	0	31.4	10	30	0	0.063
1	1	1	1	.	.	.	.	10	0	2	27	4.1271	62	0	0	.	0	31.4	10	30	0	0.063
1	1	1	1	.	.	.	.	3	0	1	28	5.1705	176	0	0	.	0	31.4	10	30	0	0.063
1	1	1	1	.	.	.	.	10	0	2	28	5.1533	173	0	0	.	0	31.4	10	30	0	0.063
1	1	1	1	.	.	.	.	3	0	1	29	-2	-2	1	0	.	0	31.4	10	30	0	0.063
1	1	1	1	.	.	.	.	10	0	2	29	5.4337	229	0	0	.	0	31.4	10	30	0	0.063
1	1	1	1	.	.	.	.	3	0	1	30	-2	-2	1	0	.	0	31.4	10	30	0	0.063
1	1	1	1	.	.	.	.	10	0	2	30	5.1591	174	0	0	.	0	31.4	10	30	0	0.063
2	2	1	1	41.13	41130	1.714	1714	1	1	0	0	-1	-1	1	0	.	0	27.2	10	30	0	0.063
2	2	1	1	41.13	41130	1.714	1714	2	1	0	0	-1	-1	1	0	.	0	27.2	10	30	0	0.063
2	2	1	1	.	.	.	.	3	0	1	0	4.7005	110	0	0	.	0	27.2	10	30	0	0.063
2	2	1	1	.	.	.	.	10	0	2	0	3.7136	41	0	0	.	0	27.2	10	30	0	0.063
2	2	1	1	.	.	.	.	3	0	1	1	6.4739	648	0	0	.	0	27.2	10	30	0	0.063
2	2	1	1	.	.	.	.	10	0	2	1	3.8712	48	0	0	.	0	27.2	10	30	0	0.063
2	2	1	1	.	.	.	.	3	0	1	2	7.4922	1794	0	0	.	0	27.2	10	30	0	0.063
2	2	1	1	.	.	.	.	10	0	2	2	6.0521	425	0	0	.	0	27.2	10	30	0	0.063
2	2	1	1	.	.	.	.	3	0	1	3	6.5793	720	0	0	.	0	27.2	10	30	0	0.063
2	2	1	1	.	.	.	.	10	0	2	3	4.7536	116	0	0	.	0	27.2	10	30	0	0.063
2	2	1	1	.	.	.	.	3	0	1	4	5.0876	162	0	0	.	0	27.2	10	30	0	0.063
2	2	1	1	.	.	.	.	10	0	2	4	4.7791	119	0	0	.	0	27.2	10	30	0	0.063
2	2	1	1	.	.	.	.	3	0	1	5	5.9243	374	0	0	.	0	27.2	10	30	0	0.063
2	2	1	1	.	.	.	.	10	0	2	5	4.2195	68	0	0	.	0	27.2	10	30	0	0.063
2	2	1	1	.	.	.	.	3	0	1	6	5.8916	362	0	0	.	0	27.2	10	30	0	0.063
2	2	1	1	.	.	.	.	10	0	2	6	4.0254	56	0	0	.	0	27.2	10	30	0	0.063
2	2	1	1	.	.	.	.	3	0	1	7	-2	-2	1	0	.	0	27.2	10	30	0	0.063
2	2	1	1	.	.	.	.	10	0	2	7	-2	-2	1	0	.	0	27.2	10	30	0	0.063
2	2	1	1	.	.	.	.	3	0	1	8	-2	-2	1	0	.	0	27.2	10	30	0	0.063
2	2	1	1	.	.	.	.	10	0	2	8	-2	-2	1	0	.	0	27.2	10	30	0	0.063
2	2	1	1	.	.	.	.	3	0	1	9	5.0239	152	0	0	.	0	27.2	10	30	0	0.063
2	2	1	1	.	.	.	.	10	0	2	9	3.2958	27	0	0	.	0	27.2	10	30	0	0.063
2	2	1	1	.	.	.	.	3	0	1	10	-2	-2	1	0	.	0	27.2	10	30	0	0.063
2	2	1	1	.	.	.	.	10	0	2	10	-2	-2	1	0	.	0	27.2	10	30	0	0.063
2	2	1	1	.	.	.	.	3	0	1	11	-2	-2	1	0	.	0	27.2	10	30	0	0.063
2	2	1	1	.	.	.	.	10	0	2	11	-2	-2	1	0	.	0	27.2	10	30	0	0.063
2	2	1	1	.	.	.	.	3	0	1	12	5.0752	160	0	0	.	0	27.2	10	30	0	0.063
2	2	1	1	.	.	.	.	10	0	2	12	3.6889	40	0	0	.	0	27.2	10	30	0	0.063
2	2	1	1	.	.	.	.	3	0	1	13	-2	-2	1	0	.	0	27.2	10	30	0	0.063
2	2	1	1	.	.	.	.	10	0	2	13	-2	-2	1	0	.	0	27.2	10	30	0	0.063
2	2	1	1	.	.	.	.	3	0	1	14	-2	-2	1	0	.	0	27.2	10	30	0	0.063
2	2	1	1	.	.	.	.	10	0	2	14	-2	-2	1	0	.	0	27.2	10	30	0	0.063
2	2	1	1	.	.	.	.	3	0	1	15	4.7185	112	0	0	.	0	27.2	10	30	0	0.063
2	2	1	1	.	.	.	.	10	0	2	15	3.6889	40	0	0	.	0	27.2	10	30	0	0.063
2	2	1	1	.	.	.	.	3	0	1	16	-2	-2	1	0	.	0	27.2	10	30	0	0.063
2	2	1	1	.	.	.	.	10	0	2	16	-2	-2	1	0	.	0	27.2	10	30	0	0.063
2	2	1	1	.	.	.	.	3	0	1	17	-2	-2	1	0	.	0	27.2	10	30	0	0.063
2	2	1	1	.	.	.	.	10	0	2	17	-2	-2	1	0	.	0	27.2	10	30	0	0.063
2	2	1	1	.	.	.	.	3	0	1	18	4.5218	92	0	0	.	0	27.2	10	30	0	0.063
2	2	1	1	.	.	.	.	10	0	2	18	2.8904	18	0	0	.	0	27.2	10	30	0	0.063
2	2	1	1	.	.	.	.	3	0	1	19	-2	-2	1	0	.	0	27.2	10	30	0	0.063
2	2	1	1	.	.	.	.	10	0	2	19	-2	-2	1	0	.	0	27.2	10	30	0	0.063
2	2	1	1	.	.	.	.	3	0	1	20	-2	-2	1	0	.	0	27.2	10	30	0	0.063
2	2	1	1	.	.	.	.	10	0	2	20	-2	-2	1	0	.	0	27.2	10	30	0	0.063
2	2	1	1	.	.	.	.	3	0	1	21	4.1271	62	0	0	.	0	27.2	10	30	0	0.063
2	2	1	1	.	.	.	.	10	0	2	21	3.2189	25	0	0	.	0	27.2	10	30	0	0.063
2	2	1	1	.	.	.	.	3	0	1	22	-2	-2	1	0	.	0	27.2	10	30	0	0.063
2	2	1	1	.	.	.	.	10	0	2	22	-2	-2	1	0	.	0	27.2	10	30	0	0.063
2	2	1	1	.	.	.	.	3	0	1	23	-2	-2	1	0	.	0	27.2	10	30	0	0.063
2	2	1	1	.	.	.	.	10	0	2	23	-2	-2	1	0	.	0	27.2	10	30	0	0.063
2	2	1	1	163.2	163200	27.2	27200	1	1	0	24	-1	-1	1	0	.	0	27.2	10	30	0	0.063
2	2	1	1	163.2	163200	27.2	27200	2	1	0	24	-1	-1	1	0	.	0	27.2	10	30	0	0.063
2	2	1	1	.	.	.	.	3	0	1	24	4.4067	82	0	0	.	0	27.2	10	30	0	0.063
2	2	1	1	.	.	.	.	10	0	2	24	3.2189	25	0	0	.	0	27.2	10	30	0	0.063
2	2	1	1	.	.	.	.	3	0	1	25	5.7746	322	0	0	.	0	27.2	10	30	0	0.063
2	2	1	1	.	.	.	.	10	0	2	25	4.4067	82	0	0	.	0	27.2	10	30	0	0.063
2	2	1	1	.	.	.	.	3	0	1	26	5.7366	310	0	0	.	0	27.2	10	30	0	0.063
2	2	1	1	.	.	.	.	10	0	2	26	6.0014	404	0	0	.	0	27.2	10	30	0	0.063
2	2	1	1	.	.	.	.	3	0	1	27	5.2364	188	0	0	.	0	27.2	10	30	0	0.063
2	2	1	1	.	.	.	.	10	0	2	27	5.5835	266	0	0	.	0	27.2	10	30	0	0.063
2	2	1	1	.	.	.	.	3	0	1	28	5.1475	172	0	0	.	0	27.2	10	30	0	0.063
2	2	1	1	.	.	.	.	10	0	2	28	4.852	128	0	0	.	0	27.2	10	30	0	0.063
2	2	1	1	.	.	.	.	3	0	1	29	5.0239	152	0	0	.	0	27.2	10	30	0	0.063
2	2	1	1	.	.	.	.	10	0	2	29	4.9053	135	0	0	.	0	27.2	10	30	0	0.063
2	2	1	1	.	.	.	.	3	0	1	30	4.9416	140	0	0	.	0	27.2	10	30	0	0.063
2	2	1	1	.	.	.	.	10	0	2	30	4.8442	127	0	0	.	0	27.2	10	30	0	0.063
3	3	1	1	45.36	45360	1.89	1890	1	1	0	0	-1	-1	1	0	.	0	30	10	30	0	0.063
3	3	1	1	45.36	45360	1.89	1890	2	1	0	0	-1	-1	1	0	.	0	30	10	30	0	0.063
3	3	1	1	.	.	.	.	3	0	1	0	5.5452	256	0	0	.	0	30	10	30	0	0.063
3	3	1	1	.	.	.	.	10	0	2	0	4.6386	103.4	0	0	.	0	30	10	30	0	0.063
3	3	1	1	.	.	.	.	3	0	1	1	5.8406	344	0	0	.	0	30	10	30	0	0.063
3	3	1	1	.	.	.	.	10	0	2	1	4.78	119.1	0	0	.	0	30	10	30	0	0.063
3	3	1	1	.	.	.	.	3	0	1	2	7.6148	2028	0	0	.	0	30	10	30	0	0.063
3	3	1	1	.	.	.	.	10	0	2	2	6.0563	426.8	0	0	.	0	30	10	30	0	0.063
3	3	1	1	.	.	.	.	3	0	1	3	7.0733	1180	0	0	.	0	30	10	30	0	0.063
3	3	1	1	.	.	.	.	10	0	2	3	5.9367	378.7	0	0	.	0	30	10	30	0	0.063
3	3	1	1	.	.	.	.	3	0	1	4	6.7117	822	0	0	.	0	30	10	30	0	0.063
3	3	1	1	.	.	.	.	10	0	2	4	5.6405	281.6	0	0	.	0	30	10	30	0	0.063
3	3	1	1	.	.	.	.	3	0	1	5	6.5482	698	0	0	.	0	30	10	30	0	0.063
3	3	1	1	.	.	.	.	10	0	2	5	5.6113	273.5	0	0	.	0	30	10	30	0	0.063
3	3	1	1	.	.	.	.	3	0	1	6	6.4135	610	0	0	.	0	30	10	30	0	0.063
3	3	1	1	.	.	.	.	10	0	2	6	5.5082	246.7	0	0	.	0	30	10	30	0	0.063
3	3	1	1	.	.	.	.	3	0	1	7	-2	-2	1	0	.	0	30	10	30	0	0.063
3	3	1	1	.	.	.	.	10	0	2	7	-2	-2	1	0	.	0	30	10	30	0	0.063
3	3	1	1	.	.	.	.	3	0	1	8	-2	-2	1	0	.	0	30	10	30	0	0.063
3	3	1	1	.	.	.	.	10	0	2	8	-2	-2	1	0	.	0	30	10	30	0	0.063
3	3	1	1	.	.	.	.	3	0	1	9	5.9189	372	0	0	.	0	30	10	30	0	0.063
3	3	1	1	.	.	.	.	10	0	2	9	5.238	188.3	0	0	.	0	30	10	30	0	0.063
3	3	1	1	.	.	.	.	3	0	1	10	-2	-2	1	0	.	0	30	10	30	0	0.063
3	3	1	1	.	.	.	.	10	0	2	10	-2	-2	1	0	.	0	30	10	30	0	0.063
3	3	1	1	.	.	.	.	3	0	1	11	-2	-2	1	0	.	0	30	10	30	0	0.063
3	3	1	1	.	.	.	.	10	0	2	11	-2	-2	1	0	.	0	30	10	30	0	0.063
3	3	1	1	.	.	.	.	3	0	1	12	6.045	422	0	0	.	0	30	10	30	0	0.063
3	3	1	1	.	.	.	.	10	0	2	12	5.428	227.7	0	0	.	0	30	10	30	0	0.063
3	3	1	1	.	.	.	.	3	0	1	13	-2	-2	1	0	.	0	30	10	30	0	0.063
3	3	1	1	.	.	.	.	10	0	2	13	-2	-2	1	0	.	0	30	10	30	0	0.063
3	3	1	1	.	.	.	.	3	0	1	14	-2	-2	1	0	.	0	30	10	30	0	0.063
3	3	1	1	.	.	.	.	10	0	2	14	-2	-2	1	0	.	0	30	10	30	0	0.063
3	3	1	1	.	.	.	.	3	0	1	15	5.9081	368	0	0	.	0	30	10	30	0	0.063
3	3	1	1	.	.	.	.	10	0	2	15	5.273	195	0	0	.	0	30	10	30	0	0.063
3	3	1	1	.	.	.	.	3	0	1	16	-2	-2	1	0	.	0	30	10	30	0	0.063
3	3	1	1	.	.	.	.	10	0	2	16	-2	-2	1	0	.	0	30	10	30	0	0.063
3	3	1	1	.	.	.	.	3	0	1	17	-2	-2	1	0	.	0	30	10	30	0	0.063
3	3	1	1	.	.	.	.	10	0	2	17	-2	-2	1	0	.	0	30	10	30	0	0.063
3	3	1	1	.	.	.	.	3	0	1	18	5.6768	292	0	0	.	0	30	10	30	0	0.063
3	3	1	1	.	.	.	.	10	0	2	18	5.2617	192.8	0	0	.	0	30	10	30	0	0.063
3	3	1	1	.	.	.	.	3	0	1	19	-2	-2	1	0	.	0	30	10	30	0	0.063
3	3	1	1	.	.	.	.	10	0	2	19	-2	-2	1	0	.	0	30	10	30	0	0.063
3	3	1	1	.	.	.	.	3	0	1	20	-2	-2	1	0	.	0	30	10	30	0	0.063
3	3	1	1	.	.	.	.	10	0	2	20	-2	-2	1	0	.	0	30	10	30	0	0.063
3	3	1	1	.	.	.	.	3	0	1	21	5.4116	224	0	0	.	0	30	10	30	0	0.063
3	3	1	1	.	.	.	.	10	0	2	21	5.1222	167.7	0	0	.	0	30	10	30	0	0.063
3	3	1	1	.	.	.	.	3	0	1	22	-2	-2	1	0	.	0	30	10	30	0	0.063
3	3	1	1	.	.	.	.	10	0	2	22	-2	-2	1	0	.	0	30	10	30	0	0.063
3	3	1	1	.	.	.	.	3	0	1	23	-2	-2	1	0	.	0	30	10	30	0	0.063
3	3	1	1	.	.	.	.	10	0	2	23	-2	-2	1	0	.	0	30	10	30	0	0.063
3	3	1	1	180	180000	30	30000	1	1	0	24	-1	-1	1	0	.	0	30	10	30	0	0.063
3	3	1	1	180	180000	30	30000	2	1	0	24	-1	-1	1	0	.	0	30	10	30	0	0.063
3	3	1	1	.	.	.	.	3	0	1	24	5.9189	372	0	0	.	0	30	10	30	0	0.063
3	3	1	1	.	.	.	.	10	0	2	24	5.349	210.4	0	0	.	0	30	10	30	0	0.063
3	3	1	1	.	.	.	.	3	0	1	25	6.0403	420	0	0	.	0	30	10	30	0	0.063
3	3	1	1	.	.	.	.	10	0	2	25	5.2617	192.8	0	0	.	0	30	10	30	0	0.063
3	3	1	1	.	.	.	.	3	0	1	26	7.7973	2434	0	0	.	0	30	10	30	0	0.063
3	3	1	1	.	.	.	.	10	0	2	26	7.0584	1162.6	0	0	.	0	30	10	30	0	0.063
3	3	1	1	.	.	.	.	3	0	1	27	6.8046	902	0	0	.	0	30	10	30	0	0.063
3	3	1	1	.	.	.	.	10	0	2	27	6.6911	805.2	0	0	.	0	30	10	30	0	0.063
3	3	1	1	.	.	.	.	3	0	1	28	6.2538	520	0	0	.	0	30	10	30	0	0.063
3	3	1	1	.	.	.	.	10	0	2	28	6.179	482.5	0	0	.	0	30	10	30	0	0.063
3	3	1	1	.	.	.	.	3	0	1	29	6.0014	404	0	0	.	0	30	10	30	0	0.063
3	3	1	1	.	.	.	.	10	0	2	29	5.9842	397.1	0	0	.	0	30	10	30	0	0.063
3	3	1	1	.	.	.	.	3	0	1	30	5.7621	318	0	0	.	0	30	10	30	0	0.063
3	3	1	1	.	.	.	.	10	0	2	30	5.8342	341.8	0	0	.	0	30	10	30	0	0.063
4	4	1	4	49.59	49590	2.066	2066	1	1	0	0	-1	-1	1	0	.	0	32.8	10	30	0	0.063
4	4	1	4	49.59	49590	2.066	2066	2	1	0	0	-1	-1	1	0	.	0	32.8	10	30	0	0.063
4	4	1	4	.	.	.	.	3	0	1	0	5.9402	380	0	0	.	0	32.8	10	30	0	0.063
4	4	1	4	.	.	.	.	10	0	2	0	3.7819	43.9	0	0	.	0	32.8	10	30	0	0.063
4	4	1	4	.	.	.	.	3	0	1	1	6.0958	444	0	0	.	0	32.8	10	30	0	0.063
4	4	1	4	.	.	.	.	10	0	2	1	4.3618	78.4	0	0	.	0	32.8	10	30	0	0.063
4	4	1	4	.	.	.	.	3	0	1	2	7.4955	1800	0	0	.	0	32.8	10	30	0	0.063
4	4	1	4	.	.	.	.	10	0	2	2	5.3794	216.9	0	0	.	0	32.8	10	30	0	0.063
4	4	1	4	.	.	.	.	3	0	1	3	6.9197	1012	0	0	.	0	32.8	10	30	0	0.063
4	4	1	4	.	.	.	.	10	0	2	3	5.633	279.5	0	0	.	0	32.8	10	30	0	0.063
4	4	1	4	.	.	.	.	3	0	1	4	6.5876	726	0	0	.	0	32.8	10	30	0	0.063
4	4	1	4	.	.	.	.	10	0	2	4	5.4735	238.3	0	0	.	0	32.8	10	30	0	0.063
4	4	1	4	.	.	.	.	3	0	1	5	6.3801	590	0	0	.	0	32.8	10	30	0	0.063
4	4	1	4	.	.	.	.	10	0	2	5	5.6546	285.6	0	0	.	0	32.8	10	30	0	0.063
4	4	1	4	.	.	.	.	3	0	1	6	6.1269	458	0	0	.	0	32.8	10	30	0	0.063
4	4	1	4	.	.	.	.	10	0	2	6	5.4553	234	0	0	.	0	32.8	10	30	0	0.063
4	4	1	4	.	.	.	.	3	0	1	7	-2	-2	1	0	.	0	32.8	10	30	0	0.063
4	4	1	4	.	.	.	.	10	0	2	7	-2	-2	1	0	.	0	32.8	10	30	0	0.063
4	4	1	4	.	.	.	.	3	0	1	8	-2	-2	1	0	.	0	32.8	10	30	0	0.063
4	4	1	4	.	.	.	.	10	0	2	8	-2	-2	1	0	.	0	32.8	10	30	0	0.063
4	4	1	4	.	.	.	.	3	0	1	9	5.6276	278	0	0	.	0	32.8	10	30	0	0.063
4	4	1	4	.	.	.	.	10	0	2	9	4.8805	131.7	0	0	.	0	32.8	10	30	0	0.063
4	4	1	4	.	.	.	.	3	0	1	10	-2	-2	1	0	.	0	32.8	10	30	0	0.063
4	4	1	4	.	.	.	.	10	0	2	10	-2	-2	1	0	.	0	32.8	10	30	0	0.063
4	4	1	4	.	.	.	.	3	0	1	11	-2	-2	1	0	.	0	32.8	10	30	0	0.063
4	4	1	4	.	.	.	.	10	0	2	11	-2	-2	1	0	.	0	32.8	10	30	0	0.063
4	4	1	4	.	.	.	.	3	0	1	12	5.7869	326	0	0	.	0	32.8	10	30	0	0.063
4	4	1	4	.	.	.	.	10	0	2	12	4.8007	121.6	0	0	.	0	32.8	10	30	0	0.063
4	4	1	4	.	.	.	.	3	0	1	13	-2	-2	1	0	.	0	32.8	10	30	0	0.063
4	4	1	4	.	.	.	.	10	0	2	13	-2	-2	1	0	.	0	32.8	10	30	0	0.063
4	4	1	4	.	.	.	.	3	0	1	14	-2	-2	1	0	.	0	32.8	10	30	0	0.063
4	4	1	4	.	.	.	.	10	0	2	14	-2	-2	1	0	.	0	32.8	10	30	0	0.063
4	4	1	4	.	.	.	.	3	0	1	15	5.6904	296	0	0	.	0	32.8	10	30	0	0.063
4	4	1	4	.	.	.	.	10	0	2	15	5.3279	206	0	0	.	0	32.8	10	30	0	0.063
4	4	1	4	.	.	.	.	3	0	1	16	-2	-2	1	0	.	0	32.8	10	30	0	0.063
4	4	1	4	.	.	.	.	10	0	2	16	-2	-2	1	0	.	0	32.8	10	30	0	0.063
4	4	1	4	.	.	.	.	3	0	1	17	-2	-2	1	0	.	0	32.8	10	30	0	0.063
4	4	1	4	.	.	.	.	10	0	2	17	-2	-2	1	0	.	0	32.8	10	30	0	0.063
4	4	1	4	.	.	.	.	3	0	1	18	5.6348	280	0	0	.	0	32.8	10	30	0	0.063
4	4	1	4	.	.	.	.	10	0	2	18	4.8614	129.2	0	0	.	0	32.8	10	30	0	0.063
4	4	1	4	.	.	.	.	3	0	1	19	-2	-2	1	0	.	0	32.8	10	30	0	0.063
4	4	1	4	.	.	.	.	10	0	2	19	-2	-2	1	0	.	0	32.8	10	30	0	0.063
4	4	1	4	.	.	.	.	3	0	1	20	-2	-2	1	0	.	0	32.8	10	30	0	0.063
4	4	1	4	.	.	.	.	10	0	2	20	-2	-2	1	0	.	0	32.8	10	30	0	0.063
4	4	1	4	.	.	.	.	3	0	1	21	5.5215	250	0	0	.	0	32.8	10	30	0	0.063
4	4	1	4	.	.	.	.	10	0	2	21	4.7353	113.9	0	0	.	0	32.8	10	30	0	0.063
4	4	1	4	.	.	.	.	3	0	1	22	-2	-2	1	0	.	0	32.8	10	30	0	0.063
4	4	1	4	.	.	.	.	10	0	2	22	-2	-2	1	0	.	0	32.8	10	30	0	0.063
4	4	1	4	.	.	.	.	3	0	1	23	-2	-2	1	0	.	0	32.8	10	30	0	0.063
4	4	1	4	.	.	.	.	10	0	2	23	-2	-2	1	0	.	0	32.8	10	30	0	0.063
4	4	1	4	787.2	787200	131.2	131200	1	1	0	24	-1	-1	1	0	.	0	32.8	10	30	0	0.063
4	4	1	4	787.2	787200	131.2	131200	2	1	0	24	-1	-1	1	0	.	0	32.8	10	30	0	0.063
4	4	1	4	.	.	.	.	3	0	1	24	5.4467	232	0	0	.	0	32.8	10	30	0	0.063
4	4	1	4	.	.	.	.	10	0	2	24	5.2617	192.8	0	0	.	0	32.8	10	30	0	0.063
4	4	1	4	.	.	.	.	3	0	1	25	10.1137	24680	0	0	.	0	32.8	10	30	0	0.063
4	4	1	4	.	.	.	.	10	0	2	25	6.5138	674.4	0	0	.	0	32.8	10	30	0	0.063
4	4	1	4	.	.	.	.	3	0	1	26	8.7128	6080	0	0	.	0	32.8	10	30	0	0.063
4	4	1	4	.	.	.	.	10	0	2	26	7.6867	2179.1	0	0	.	0	32.8	10	30	0	0.063
4	4	1	4	.	.	.	.	3	0	1	27	7.6128	2024	0	0	.	0	32.8	10	30	0	0.063
4	4	1	4	.	.	.	.	10	0	2	27	7.4035	1641.8	0	0	.	0	32.8	10	30	0	0.063
4	4	1	4	.	.	.	.	3	0	1	28	7.0562	1160	0	0	.	0	32.8	10	30	0	0.063
4	4	1	4	.	.	.	.	10	0	2	28	7.2086	1351	0	0	.	0	32.8	10	30	0	0.063
4	4	1	4	.	.	.	.	3	0	1	29	6.7238	832	0	0	.	0	32.8	10	30	0	0.063
4	4	1	4	.	.	.	.	10	0	2	29	7.0335	1134	0	0	.	0	32.8	10	30	0	0.063
4	4	1	4	.	.	.	.	3	0	1	30	6.4457	630	0	0	.	0	32.8	10	30	0	0.063
4	4	1	4	.	.	.	.	10	0	2	30	6.9611	1054.8	0	0	.	0	32.8	10	30	0	0.063
5	5	1	4	44.3	44300	1.846	1846	1	1	0	0	-1	-1	1	0	.	0	29.3	10	30	0	0.063
5	5	1	4	44.3	44300	1.846	1846	2	1	0	0	-1	-1	1	0	.	0	29.3	10	30	0	0.063
5	5	1	4	.	.	.	.	3	0	1	0	5.4116	224	0	0	.	0	29.3	10	30	0	0.063
5	5	1	4	.	.	.	.	10	0	2	0	3.45	31.5	0	0	.	0	29.3	10	30	0	0.063
5	5	1	4	.	.	.	.	3	0	1	1	7.3172	1506	0	0	.	0	29.3	10	30	0	0.063
5	5	1	4	.	.	.	.	10	0	2	1	4.4636	86.8	0	0	.	0	29.3	10	30	0	0.063
5	5	1	4	.	.	.	.	3	0	1	2	7.1562	1282	0	0	.	0	29.3	10	30	0	0.063
5	5	1	4	.	.	.	.	10	0	2	2	5.8769	356.7	0	0	.	0	29.3	10	30	0	0.063
5	5	1	4	.	.	.	.	3	0	1	3	6.7569	860	0	0	.	0	29.3	10	30	0	0.063
5	5	1	4	.	.	.	.	10	0	2	3	5.0376	154.1	0	0	.	0	29.3	10	30	0	0.063
5	5	1	4	.	.	.	.	3	0	1	4	6.4232	616	0	0	.	0	29.3	10	30	0	0.063
5	5	1	4	.	.	.	.	10	0	2	4	5.4769	239.1	0	0	.	0	29.3	10	30	0	0.063
5	5	1	4	.	.	.	.	3	0	1	5	6.452	634	0	0	.	0	29.3	10	30	0	0.063
5	5	1	4	.	.	.	.	10	0	2	5	5.4333	228.9	0	0	.	0	29.3	10	30	0	0.063
5	5	1	4	.	.	.	.	3	0	1	6	6.48	652	0	0	.	0	29.3	10	30	0	0.063
5	5	1	4	.	.	.	.	10	0	2	6	5.4852	241.1	0	0	.	0	29.3	10	30	0	0.063
5	5	1	4	.	.	.	.	3	0	1	7	-2	-2	1	0	.	0	29.3	10	30	0	0.063
5	5	1	4	.	.	.	.	10	0	2	7	-2	-2	1	0	.	0	29.3	10	30	0	0.063
5	5	1	4	.	.	.	.	3	0	1	8	-2	-2	1	0	.	0	29.3	10	30	0	0.063
5	5	1	4	.	.	.	.	10	0	2	8	-2	-2	1	0	.	0	29.3	10	30	0	0.063
5	5	1	4	.	.	.	.	3	0	1	9	5.717	304	0	0	.	0	29.3	10	30	0	0.063
5	5	1	4	.	.	.	.	10	0	2	9	3.7955	44.5	0	0	.	0	29.3	10	30	0	0.063
5	5	1	4	.	.	.	.	3	0	1	10	-2	-2	1	0	.	0	29.3	10	30	0	0.063
5	5	1	4	.	.	.	.	10	0	2	10	-2	-2	1	0	.	0	29.3	10	30	0	0.063
5	5	1	4	.	.	.	.	3	0	1	11	-2	-2	1	0	.	0	29.3	10	30	0	0.063
5	5	1	4	.	.	.	.	10	0	2	11	-2	-2	1	0	.	0	29.3	10	30	0	0.063
5	5	1	4	.	.	.	.	3	0	1	12	5.3471	210	0	0	.	0	29.3	10	30	0	0.063
5	5	1	4	.	.	.	.	10	0	2	12	3.7955	44.5	0	0	.	0	29.3	10	30	0	0.063
5	5	1	4	.	.	.	.	3	0	1	13	-2	-2	1	0	.	0	29.3	10	30	0	0.063
5	5	1	4	.	.	.	.	10	0	2	13	-2	-2	1	0	.	0	29.3	10	30	0	0.063
5	5	1	4	.	.	.	.	3	0	1	14	-2	-2	1	0	.	0	29.3	10	30	0	0.063
5	5	1	4	.	.	.	.	10	0	2	14	-2	-2	1	0	.	0	29.3	10	30	0	0.063
5	5	1	4	.	.	.	.	3	0	1	15	5.5053	246	0	0	.	0	29.3	10	30	0	0.063
5	5	1	4	.	.	.	.	10	0	2	15	4.086	59.5	0	0	.	0	29.3	10	30	0	0.063
5	5	1	4	.	.	.	.	3	0	1	16	-2	-2	1	0	.	0	29.3	10	30	0	0.063
5	5	1	4	.	.	.	.	10	0	2	16	-2	-2	1	0	.	0	29.3	10	30	0	0.063
5	5	1	4	.	.	.	.	3	0	1	17	-2	-2	1	0	.	0	29.3	10	30	0	0.063
5	5	1	4	.	.	.	.	10	0	2	17	-2	-2	1	0	.	0	29.3	10	30	0	0.063
5	5	1	4	.	.	.	.	3	0	1	18	5.3566	212	0	0	.	0	29.3	10	30	0	0.063
5	5	1	4	.	.	.	.	10	0	2	18	3.8628	47.6	0	0	.	0	29.3	10	30	0	0.063
5	5	1	4	.	.	.	.	3	0	1	19	-2	-2	1	0	.	0	29.3	10	30	0	0.063
5	5	1	4	.	.	.	.	10	0	2	19	-2	-2	1	0	.	0	29.3	10	30	0	0.063
5	5	1	4	.	.	.	.	3	0	1	20	-2	-2	1	0	.	0	29.3	10	30	0	0.063
5	5	1	4	.	.	.	.	10	0	2	20	-2	-2	1	0	.	0	29.3	10	30	0	0.063
5	5	1	4	.	.	.	.	3	0	1	21	5.3083	202	0	0	.	0	29.3	10	30	0	0.063
5	5	1	4	.	.	.	.	10	0	2	21	4.086	59.5	0	0	.	0	29.3	10	30	0	0.063
5	5	1	4	.	.	.	.	3	0	1	22	-2	-2	1	0	.	0	29.3	10	30	0	0.063
5	5	1	4	.	.	.	.	10	0	2	22	-2	-2	1	0	.	0	29.3	10	30	0	0.063
5	5	1	4	.	.	.	.	3	0	1	23	-2	-2	1	0	.	0	29.3	10	30	0	0.063
5	5	1	4	.	.	.	.	10	0	2	23	-2	-2	1	0	.	0	29.3	10	30	0	0.063
5	5	1	4	703.2	703200	117.2	117200	1	1	0	24	-1	-1	1	0	.	0	29.3	10	30	0	0.063
5	5	1	4	703.2	703200	117.2	117200	2	1	0	24	-1	-1	1	0	.	0	29.3	10	30	0	0.063
5	5	1	4	.	.	.	.	3	0	1	24	5.0876	162	0	0	.	0	29.3	10	30	0	0.063
5	5	1	4	.	.	.	.	10	0	2	24	3.45	31.5	0	0	.	0	29.3	10	30	0	0.063
5	5	1	4	.	.	.	.	3	0	1	25	8.1881	3598	0	0	.	0	29.3	10	30	0	0.063
5	5	1	4	.	.	.	.	10	0	2	25	4.9767	145	0	0	.	0	29.3	10	30	0	0.063
5	5	1	4	.	.	.	.	3	0	1	26	7.3601	1572	0	0	.	0	29.3	10	30	0	0.063
5	5	1	4	.	.	.	.	10	0	2	26	6.8477	941.7	0	0	.	0	29.3	10	30	0	0.063
5	5	1	4	.	.	.	.	3	0	1	27	6.6871	802	0	0	.	0	29.3	10	30	0	0.063
5	5	1	4	.	.	.	.	10	0	2	27	6.4292	619.7	0	0	.	0	29.3	10	30	0	0.063
5	5	1	4	.	.	.	.	3	0	1	28	6.5482	698	0	0	.	0	29.3	10	30	0	0.063
5	5	1	4	.	.	.	.	10	0	2	28	6.4016	602.8	0	0	.	0	29.3	10	30	0	0.063
5	5	1	4	.	.	.	.	3	0	1	29	6.1181	454	0	0	.	0	29.3	10	30	0	0.063
5	5	1	4	.	.	.	.	10	0	2	29	6.5389	691.5	0	0	.	0	29.3	10	30	0	0.063
5	5	1	4	.	.	.	.	3	0	1	30	5.4972	244	0	0	.	0	29.3	10	30	0	0.063
5	5	1	4	.	.	.	.	10	0	2	30	6.6558	777.3	0	0	.	0	29.3	10	30	0	0.063
6	6	1	4	41.88	41880	1.745	1745	1	1	0	0	-1	-1	1	0	.	0	27.7	10	30	0	0.063
6	6	1	4	41.88	41880	1.745	1745	2	1	0	0	-1	-1	1	0	.	0	27.7	10	30	0	0.063
6	6	1	4	.	.	.	.	3	0	1	0	5.2781	196	0	0	.	0	27.7	10	30	0	0.063
6	6	1	4	.	.	.	.	10	0	2	0	4.9877	146.6	0	0	.	0	27.7	10	30	0	0.063
6	6	1	4	.	.	.	.	3	0	1	1	8.8707	7120	0	0	.	0	27.7	10	30	0	0.063
6	6	1	4	.	.	.	.	10	0	2	1	5.4223	226.4	0	0	.	0	27.7	10	30	0	0.063
6	6	1	4	.	.	.	.	3	0	1	2	8.9459	7676	0	0	.	0	27.7	10	30	0	0.063
6	6	1	4	.	.	.	.	10	0	2	2	6.5766	718.1	0	0	.	0	27.7	10	30	0	0.063
6	6	1	4	.	.	.	.	3	0	1	3	7.854	2576	0	0	.	0	27.7	10	30	0	0.063
6	6	1	4	.	.	.	.	10	0	2	3	5.7602	317.4	0	0	.	0	27.7	10	30	0	0.063
6	6	1	4	.	.	.	.	3	0	1	4	7.5326	1868	0	0	.	0	27.7	10	30	0	0.063
6	6	1	4	.	.	.	.	10	0	2	4	5.4076	223.1	0	0	.	0	27.7	10	30	0	0.063
6	6	1	4	.	.	.	.	3	0	1	5	7.3601	1572	0	0	.	0	27.7	10	30	0	0.063
6	6	1	4	.	.	.	.	10	0	2	5	5.2837	197.1	0	0	.	0	27.7	10	30	0	0.063
6	6	1	4	.	.	.	.	3	0	1	6	7.5283	1860	0	0	.	0	27.7	10	30	0	0.063
6	6	1	4	.	.	.	.	10	0	2	6	4.9244	137.6	0	0	.	0	27.7	10	30	0	0.063
6	6	1	4	.	.	.	.	3	0	1	7	-2	-2	1	0	.	0	27.7	10	30	0	0.063
6	6	1	4	.	.	.	.	10	0	2	7	-2	-2	1	0	.	0	27.7	10	30	0	0.063
6	6	1	4	.	.	.	.	3	0	1	8	-2	-2	1	0	.	0	27.7	10	30	0	0.063
6	6	1	4	.	.	.	.	10	0	2	8	-2	-2	1	0	.	0	27.7	10	30	0	0.063
6	6	1	4	.	.	.	.	3	0	1	9	7.1483	1272	0	0	.	0	27.7	10	30	0	0.063
6	6	1	4	.	.	.	.	10	0	2	9	5.1084	165.4	0	0	.	0	27.7	10	30	0	0.063
6	6	1	4	.	.	.	.	3	0	1	10	-2	-2	1	0	.	0	27.7	10	30	0	0.063
6	6	1	4	.	.	.	.	10	0	2	10	-2	-2	1	0	.	0	27.7	10	30	0	0.063
6	6	1	4	.	.	.	.	3	0	1	11	-2	-2	1	0	.	0	27.7	10	30	0	0.063
6	6	1	4	.	.	.	.	10	0	2	11	-2	-2	1	0	.	0	27.7	10	30	0	0.063
6	6	1	4	.	.	.	.	3	0	1	12	6.3665	582	0	0	.	0	27.7	10	30	0	0.063
6	6	1	4	.	.	.	.	10	0	2	12	5.0133	150.4	0	0	.	0	27.7	10	30	0	0.063
6	6	1	4	.	.	.	.	3	0	1	13	-2	-2	1	0	.	0	27.7	10	30	0	0.063
6	6	1	4	.	.	.	.	10	0	2	13	-2	-2	1	0	.	0	27.7	10	30	0	0.063
6	6	1	4	.	.	.	.	3	0	1	14	-2	-2	1	0	.	0	27.7	10	30	0	0.063
6	6	1	4	.	.	.	.	10	0	2	14	-2	-2	1	0	.	0	27.7	10	30	0	0.063
6	6	1	4	.	.	.	.	3	0	1	15	6.2265	506	0	0	.	0	27.7	10	30	0	0.063
6	6	1	4	.	.	.	.	10	0	2	15	5.2715	194.7	0	0	.	0	27.7	10	30	0	0.063
6	6	1	4	.	.	.	.	3	0	1	16	-2	-2	1	0	.	0	27.7	10	30	0	0.063
6	6	1	4	.	.	.	.	10	0	2	16	-2	-2	1	0	.	0	27.7	10	30	0	0.063
6	6	1	4	.	.	.	.	3	0	1	17	-2	-2	1	0	.	0	27.7	10	30	0	0.063
6	6	1	4	.	.	.	.	10	0	2	17	-2	-2	1	0	.	0	27.7	10	30	0	0.063
6	6	1	4	.	.	.	.	3	0	1	18	5.8348	342	0	0	.	0	27.7	10	30	0	0.063
6	6	1	4	.	.	.	.	10	0	2	18	5.5424	255.3	0	0	.	0	27.7	10	30	0	0.063
6	6	1	4	.	.	.	.	3	0	1	19	-2	-2	1	0	.	0	27.7	10	30	0	0.063
6	6	1	4	.	.	.	.	10	0	2	19	-2	-2	1	0	.	0	27.7	10	30	0	0.063
6	6	1	4	.	.	.	.	3	0	1	20	-2	-2	1	0	.	0	27.7	10	30	0	0.063
6	6	1	4	.	.	.	.	10	0	2	20	-2	-2	1	0	.	0	27.7	10	30	0	0.063
6	6	1	4	.	.	.	.	3	0	1	21	6.0776	436	0	0	.	0	27.7	10	30	0	0.063
6	6	1	4	.	.	.	.	10	0	2	21	5.046	155.4	0	0	.	0	27.7	10	30	0	0.063
6	6	1	4	.	.	.	.	3	0	1	22	-2	-2	1	0	.	0	27.7	10	30	0	0.063
6	6	1	4	.	.	.	.	10	0	2	22	-2	-2	1	0	.	0	27.7	10	30	0	0.063
6	6	1	4	.	.	.	.	3	0	1	23	-2	-2	1	0	.	0	27.7	10	30	0	0.063
6	6	1	4	.	.	.	.	10	0	2	23	-2	-2	1	0	.	0	27.7	10	30	0	0.063
6	6	1	4	664.8	664800	110.8	110800	1	1	0	24	-1	-1	1	0	.	0	27.7	10	30	0	0.063
6	6	1	4	664.8	664800	110.8	110800	2	1	0	24	-1	-1	1	0	.	0	27.7	10	30	0	0.063
6	6	1	4	.	.	.	.	3	0	1	24	6.0307	416	0	0	.	0	27.7	10	30	0	0.063
6	6	1	4	.	.	.	.	10	0	2	24	5.046	155.4	0	0	.	0	27.7	10	30	0	0.063
6	6	1	4	.	.	.	.	3	0	1	25	7.5746	1948	0	0	.	0	27.7	10	30	0	0.063
6	6	1	4	.	.	.	.	10	0	2	25	4.5185	91.7	0	0	.	0	27.7	10	30	0	0.063
6	6	1	4	.	.	.	.	3	0	1	26	8.6566	5748	0	0	.	0	27.7	10	30	0	0.063
6	6	1	4	.	.	.	.	10	0	2	26	7.2085	1350.9	0	0	.	0	27.7	10	30	0	0.063
6	6	1	4	.	.	.	.	3	0	1	27	7.8747	2630	0	0	.	0	27.7	10	30	0	0.063
6	6	1	4	.	.	.	.	10	0	2	27	7.3448	1548.1	0	0	.	0	27.7	10	30	0	0.063
6	6	1	4	.	.	.	.	3	0	1	28	7.4889	1788	0	0	.	0	27.7	10	30	0	0.063
6	6	1	4	.	.	.	.	10	0	2	28	7.3508	1557.4	0	0	.	0	27.7	10	30	0	0.063
6	6	1	4	.	.	.	.	3	0	1	29	7.1839	1318	0	0	.	0	27.7	10	30	0	0.063
6	6	1	4	.	.	.	.	10	0	2	29	7.4835	1778.5	0	0	.	0	27.7	10	30	0	0.063
6	6	1	4	.	.	.	.	3	0	1	30	7.0335	1134	0	0	.	0	27.7	10	30	0	0.063
6	6	1	4	.	.	.	.	10	0	2	30	7.4319	1689	0	0	.	0	27.7	10	30	0	0.063
7	7	1	0	53.68	53680	1.789	1789	1	1	0	0	-1	-1	1	0	.	0	28.4	10	30	0	0.063
7	7	1	0	53.68	53680	1.789	1789	2	1	0	0	-1	-1	1	0	.	0	28.4	10	30	0	0.063
7	7	1	0	.	.	.	.	3	0	1	0	4.9836	146	0	0	.	0	28.4	10	30	0	0.063
7	7	1	0	.	.	.	.	10	0	2	0	2.5257	12.5	0	0	.	0	28.4	10	30	0	0.063
7	7	1	0	.	.	.	.	3	0	1	1	5.5759	264	0	0	.	0	28.4	10	30	0	0.063
7	7	1	0	.	.	.	.	10	0	2	1	3.1946	24.4	0	0	.	0	28.4	10	30	0	0.063
7	7	1	0	.	.	.	.	3	0	1	2	6.1527	470	0	0	.	0	28.4	10	30	0	0.063
7	7	1	0	.	.	.	.	10	0	2	2	4.2195	68	0	0	.	0	28.4	10	30	0	0.063
7	7	1	0	.	.	.	.	3	0	1	3	6.1985	492	0	0	.	0	28.4	10	30	0	0.063
7	7	1	0	.	.	.	.	10	0	2	3	4.6738	107.1	0	0	.	0	28.4	10	30	0	0.063
7	7	1	0	.	.	.	.	3	0	1	4	6.3421	568	0	0	.	0	28.4	10	30	0	0.063
7	7	1	0	.	.	.	.	10	0	2	4	5.1963	180.6	0	0	.	0	28.4	10	30	0	0.063
7	7	1	0	.	.	.	.	3	0	1	5	6.0868	440	0	0	.	0	28.4	10	30	0	0.063
7	7	1	0	.	.	.	.	10	0	2	5	5.7835	324.9	0	0	.	0	28.4	10	30	0	0.063
7	7	1	0	.	.	.	.	3	0	1	6	5.9661	390	0	0	.	0	28.4	10	30	0	0.063
7	7	1	0	.	.	.	.	10	0	2	6	5.6444	282.7	0	0	.	0	28.4	10	30	0	0.063
7	7	1	0	.	.	.	.	3	0	1	7	-2	-2	1	0	.	0	28.4	10	30	0	0.063
7	7	1	0	.	.	.	.	10	0	2	7	-2	-2	1	0	.	0	28.4	10	30	0	0.063
7	7	1	0	.	.	.	.	3	0	1	8	-2	-2	1	0	.	0	28.4	10	30	0	0.063
7	7	1	0	.	.	.	.	10	0	2	8	-2	-2	1	0	.	0	28.4	10	30	0	0.063
7	7	1	0	.	.	.	.	3	0	1	9	5.4889	242	0	0	.	0	28.4	10	30	0	0.063
7	7	1	0	.	.	.	.	10	0	2	9	4.6738	107.1	0	0	.	0	28.4	10	30	0	0.063
7	7	1	0	.	.	.	.	3	0	1	10	-2	-2	1	0	.	0	28.4	10	30	0	0.063
7	7	1	0	.	.	.	.	10	0	2	10	-2	-2	1	0	.	0	28.4	10	30	0	0.063
7	7	1	0	.	.	.	.	3	0	1	11	-2	-2	1	0	.	0	28.4	10	30	0	0.063
7	7	1	0	.	.	.	.	10	0	2	11	-2	-2	1	0	.	0	28.4	10	30	0	0.063
7	7	1	0	.	.	.	.	3	0	1	12	5.204	182	0	0	.	0	28.4	10	30	0	0.063
7	7	1	0	.	.	.	.	10	0	2	12	4.3334	76.2	0	0	.	0	28.4	10	30	0	0.063
7	7	1	0	.	.	.	.	3	0	1	13	-2	-2	1	0	.	0	28.4	10	30	0	0.063
7	7	1	0	.	.	.	.	10	0	2	13	-2	-2	1	0	.	0	28.4	10	30	0	0.063
7	7	1	0	.	.	.	.	3	0	1	14	-2	-2	1	0	.	0	28.4	10	30	0	0.063
7	7	1	0	.	.	.	.	10	0	2	14	-2	-2	1	0	.	0	28.4	10	30	0	0.063
7	7	1	0	.	.	.	.	3	0	1	15	4.9273	138	0	0	.	0	28.4	10	30	0	0.063
7	7	1	0	.	.	.	.	10	0	2	15	4.4018	81.6	0	0	.	0	28.4	10	30	0	0.063
7	7	1	0	.	.	.	.	3	0	1	16	-2	-2	1	0	.	0	28.4	10	30	0	0.063
7	7	1	0	.	.	.	.	10	0	2	16	-2	-2	1	0	.	0	28.4	10	30	0	0.063
7	7	1	0	.	.	.	.	3	0	1	17	-2	-2	1	0	.	0	28.4	10	30	0	0.063
7	7	1	0	.	.	.	.	10	0	2	17	-2	-2	1	0	.	0	28.4	10	30	0	0.063
7	7	1	0	.	.	.	.	3	0	1	18	4.7005	110	0	0	.	0	28.4	10	30	0	0.063
7	7	1	0	.	.	.	.	10	0	2	18	4.2973	73.5	0	0	.	0	28.4	10	30	0	0.063
7	7	1	0	.	.	.	.	3	0	1	19	-2	-2	1	0	.	0	28.4	10	30	0	0.063
7	7	1	0	.	.	.	.	10	0	2	19	-2	-2	1	0	.	0	28.4	10	30	0	0.063
7	7	1	0	.	.	.	.	3	0	1	20	-2	-2	1	0	.	0	28.4	10	30	0	0.063
7	7	1	0	.	.	.	.	10	0	2	20	-2	-2	1	0	.	0	28.4	10	30	0	0.063
7	7	1	0	.	.	.	.	3	0	1	21	5.1475	172	0	0	.	0	28.4	10	30	0	0.063
7	7	1	0	.	.	.	.	10	0	2	21	4.6012	99.6	0	0	.	0	28.4	10	30	0	0.063
7	7	1	0	.	.	.	.	3	0	1	22	-2	-2	1	0	.	0	28.4	10	30	0	0.063
7	7	1	0	.	.	.	.	10	0	2	22	-2	-2	1	0	.	0	28.4	10	30	0	0.063
7	7	1	0	.	.	.	.	3	0	1	23	-2	-2	1	0	.	0	28.4	10	30	0	0.063
7	7	1	0	.	.	.	.	10	0	2	23	-2	-2	1	0	.	0	28.4	10	30	0	0.063
7	7	1	0	.	.	.	.	3	0	1	24	5.1591	174	0	0	.	0	28.4	10	30	0	0.063
7	7	1	0	.	.	.	.	10	0	2	24	4.7816	119.3	0	0	.	0	28.4	10	30	0	0.063
7	7	1	0	.	.	.	.	3	0	1	25	5.0239	152	0	0	.	0	28.4	10	30	0	0.063
7	7	1	0	.	.	.	.	10	0	2	25	4.9925	147.3	0	0	.	0	28.4	10	30	0	0.063
7	7	1	0	.	.	.	.	3	0	1	26	5.124	168	0	0	.	0	28.4	10	30	0	0.063
7	7	1	0	.	.	.	.	10	0	2	26	5.2868	197.7	0	0	.	0	28.4	10	30	0	0.063
7	7	1	0	.	.	.	.	3	0	1	27	4.8828	132	0	0	.	0	28.4	10	30	0	0.063
7	7	1	0	.	.	.	.	10	0	2	27	4.5497	94.6	0	0	.	0	28.4	10	30	0	0.063
7	7	1	0	.	.	.	.	3	0	1	28	4.9698	144	0	0	.	0	28.4	10	30	0	0.063
7	7	1	0	.	.	.	.	10	0	2	28	4.5218	92	0	0	.	0	28.4	10	30	0	0.063
7	7	1	0	.	.	.	.	3	0	1	29	5.112	166	0	0	.	0	28.4	10	30	0	0.063
7	7	1	0	.	.	.	.	10	0	2	29	4.6968	109.6	0	0	.	0	28.4	10	30	0	0.063
7	7	1	0	.	.	.	.	3	0	1	30	5.0499	156	0	0	.	0	28.4	10	30	0	0.063
7	7	1	0	.	.	.	.	10	0	2	30	4.6738	107.1	0	0	.	0	28.4	10	30	0	0.063
8	8	1	0	48.38	48380	1.613	1613	1	1	0	0	-1	-1	1	0	.	0	25.6	10	30	0	0.063
8	8	1	0	48.38	48380	1.613	1613	2	1	0	0	-1	-1	1	0	.	0	25.6	10	30	0	0.063
8	8	1	0	.	.	.	.	3	0	1	0	5.7366	310	0	0	.	0	25.6	10	30	0	0.063
8	8	1	0	.	.	.	.	10	0	2	0	2.3026	10	0	0	.	0	25.6	10	30	0	0.063
8	8	1	0	.	.	.	.	3	0	1	1	8.3236	4120	0	0	.	0	25.6	10	30	0	0.063
8	8	1	0	.	.	.	.	10	0	2	1	2.3026	10	0	1	.	0	25.6	10	30	0	0.063
8	8	1	0	.	.	.	.	3	0	1	2	9.5627	14224	0	0	.	0	25.6	10	30	0	0.063
8	8	1	0	.	.	.	.	10	0	2	2	7.0681	1173.9	0	0	.	0	25.6	10	30	0	0.063
8	8	1	0	.	.	.	.	3	0	1	3	8.2433	3802	0	0	.	0	25.6	10	30	0	0.063
8	8	1	0	.	.	.	.	10	0	2	3	7.0515	1154.6	0	0	.	0	25.6	10	30	0	0.063
8	8	1	0	.	.	.	.	3	0	1	4	8.0222	3048	0	0	.	0	25.6	10	30	0	0.063
8	8	1	0	.	.	.	.	10	0	2	4	6.985	1080.3	0	0	.	0	25.6	10	30	0	0.063
8	8	1	0	.	.	.	.	3	0	1	5	7.7433	2306	0	0	.	0	25.6	10	30	0	0.063
8	8	1	0	.	.	.	.	10	0	2	5	7.1277	1246	0	0	.	0	25.6	10	30	0	0.063
8	8	1	0	.	.	.	.	3	0	1	6	7.688	2182	0	0	.	0	25.6	10	30	0	0.063
8	8	1	0	.	.	.	.	10	0	2	6	7.2498	1407.8	0	0	.	0	25.6	10	30	0	0.063
8	8	1	0	.	.	.	.	3	0	1	7	-2	-2	1	0	.	0	25.6	10	30	0	0.063
8	8	1	0	.	.	.	.	10	0	2	7	-2	-2	1	0	.	0	25.6	10	30	0	0.063
8	8	1	0	.	.	.	.	3	0	1	8	-2	-2	1	0	.	0	25.6	10	30	0	0.063
8	8	1	0	.	.	.	.	10	0	2	8	-2	-2	1	0	.	0	25.6	10	30	0	0.063
8	8	1	0	.	.	.	.	3	0	1	9	7.142	1264	0	0	.	0	25.6	10	30	0	0.063
8	8	1	0	.	.	.	.	10	0	2	9	7.5944	1987	0	0	.	0	25.6	10	30	0	0.063
8	8	1	0	.	.	.	.	3	0	1	10	-2	-2	1	0	.	0	25.6	10	30	0	0.063
8	8	1	0	.	.	.	.	10	0	2	10	-2	-2	1	0	.	0	25.6	10	30	0	0.063
8	8	1	0	.	.	.	.	3	0	1	11	-2	-2	1	0	.	0	25.6	10	30	0	0.063
8	8	1	0	.	.	.	.	10	0	2	11	-2	-2	1	0	.	0	25.6	10	30	0	0.063
8	8	1	0	.	.	.	.	3	0	1	12	7.1686	1298	0	0	.	0	25.6	10	30	0	0.063
8	8	1	0	.	.	.	.	10	0	2	12	7.4908	1791.4	0	0	.	0	25.6	10	30	0	0.063
8	8	1	0	.	.	.	.	3	0	1	13	-2	-2	1	0	.	0	25.6	10	30	0	0.063
8	8	1	0	.	.	.	.	10	0	2	13	-2	-2	1	0	.	0	25.6	10	30	0	0.063
8	8	1	0	.	.	.	.	3	0	1	14	-2	-2	1	0	.	0	25.6	10	30	0	0.063
8	8	1	0	.	.	.	.	10	0	2	14	-2	-2	1	0	.	0	25.6	10	30	0	0.063
8	8	1	0	.	.	.	.	3	0	1	15	6.8287	924	0	0	.	0	25.6	10	30	0	0.063
8	8	1	0	.	.	.	.	10	0	2	15	6.3882	594.8	0	0	.	0	25.6	10	30	0	0.063
8	8	1	0	.	.	.	.	3	0	1	16	-2	-2	1	0	.	0	25.6	10	30	0	0.063
8	8	1	0	.	.	.	.	10	0	2	16	-2	-2	1	0	.	0	25.6	10	30	0	0.063
8	8	1	0	.	.	.	.	3	0	1	17	-2	-2	1	0	.	0	25.6	10	30	0	0.063
8	8	1	0	.	.	.	.	10	0	2	17	-2	-2	1	0	.	0	25.6	10	30	0	0.063
8	8	1	0	.	.	.	.	3	0	1	18	6.1612	474	0	0	.	0	25.6	10	30	0	0.063
8	8	1	0	.	.	.	.	10	0	2	18	5.6988	298.5	0	0	.	0	25.6	10	30	0	0.063
8	8	1	0	.	.	.	.	3	0	1	19	-2	-2	1	0	.	0	25.6	10	30	0	0.063
8	8	1	0	.	.	.	.	10	0	2	19	-2	-2	1	0	.	0	25.6	10	30	0	0.063
8	8	1	0	.	.	.	.	3	0	1	20	-2	-2	1	0	.	0	25.6	10	30	0	0.063
8	8	1	0	.	.	.	.	10	0	2	20	-2	-2	1	0	.	0	25.6	10	30	0	0.063
8	8	1	0	.	.	.	.	3	0	1	21	5.961	388	0	0	.	0	25.6	10	30	0	0.063
8	8	1	0	.	.	.	.	10	0	2	21	5.6182	275.4	0	0	.	0	25.6	10	30	0	0.063
8	8	1	0	.	.	.	.	3	0	1	22	-2	-2	1	0	.	0	25.6	10	30	0	0.063
8	8	1	0	.	.	.	.	10	0	2	22	-2	-2	1	0	.	0	25.6	10	30	0	0.063
8	8	1	0	.	.	.	.	3	0	1	23	-2	-2	1	0	.	0	25.6	10	30	0	0.063
8	8	1	0	.	.	.	.	10	0	2	23	-2	-2	1	0	.	0	25.6	10	30	0	0.063
8	8	1	0	.	.	.	.	3	0	1	24	5.8749	356	0	0	.	0	25.6	10	30	0	0.063
8	8	1	0	.	.	.	.	10	0	2	24	5.4856	241.2	0	0	.	0	25.6	10	30	0	0.063
8	8	1	0	.	.	.	.	3	0	1	25	5.7683	320	0	0	.	0	25.6	10	30	0	0.063
8	8	1	0	.	.	.	.	10	0	2	25	5.4157	224.9	0	0	.	0	25.6	10	30	0	0.063
8	8	1	0	.	.	.	.	3	0	1	26	5.8916	362	0	0	.	0	25.6	10	30	0	0.063
8	8	1	0	.	.	.	.	10	0	2	26	5.5495	257.1	0	0	.	0	25.6	10	30	0	0.063
8	8	1	0	.	.	.	.	3	0	1	27	5.8636	352	0	0	.	0	25.6	10	30	0	0.063
8	8	1	0	.	.	.	.	10	0	2	27	5.3914	219.5	0	0	.	0	25.6	10	30	0	0.063
8	8	1	0	.	.	.	.	3	0	1	28	5.8464	346	0	0	.	0	25.6	10	30	0	0.063
8	8	1	0	.	.	.	.	10	0	2	28	5.4515	233.1	0	0	.	0	25.6	10	30	0	0.063
8	8	1	0	.	.	.	.	3	0	1	29	5.4972	244	0	0	.	0	25.6	10	30	0	0.063
8	8	1	0	.	.	.	.	10	0	2	29	5.4744	238.5	0	0	.	0	25.6	10	30	0	0.063
8	8	1	0	.	.	.	.	3	0	1	30	5.5373	254	0	0	.	0	25.6	10	30	0	0.063
8	8	1	0	.	.	.	.	10	0	2	30	5.5286	251.8	0	0	.	0	25.6	10	30	0	0.063
9	9	1	0	52.35	52350	1.745	1745	1	1	0	0	-1	-1	1	0	.	0	27.7	10	30	0	0.063
9	9	1	0	52.35	52350	1.745	1745	2	1	0	0	-1	-1	1	0	.	0	27.7	10	30	0	0.063
9	9	1	0	.	.	.	.	3	0	1	0	7.8087	2462	0	0	.	0	27.7	10	30	0	0.063
9	9	1	0	.	.	.	.	10	0	2	0	5.5599	259.8	0	0	.	0	27.7	10	30	0	0.063
9	9	1	0	.	.	.	.	3	0	1	1	9.024	8300	0	0	.	0	27.7	10	30	0	0.063
9	9	1	0	.	.	.	.	10	0	2	1	5.9457	382.1	0	0	.	0	27.7	10	30	0	0.063
9	9	1	0	.	.	.	.	3	0	1	2	9.3553	11560	0	0	.	0	27.7	10	30	0	0.063
9	9	1	0	.	.	.	.	10	0	2	2	6.9873	1082.8	0	0	.	0	27.7	10	30	0	0.063
9	9	1	0	.	.	.	.	3	0	1	3	9.77	17500	0	0	.	0	27.7	10	30	0	0.063
9	9	1	0	.	.	.	.	10	0	2	3	6.8958	988.1	0	0	.	0	27.7	10	30	0	0.063
9	9	1	0	.	.	.	.	3	0	1	4	9.1391	9312	0	0	.	0	27.7	10	30	0	0.063
9	9	1	0	.	.	.	.	10	0	2	4	6.3279	560	0	0	.	0	27.7	10	30	0	0.063
9	9	1	0	.	.	.	.	3	0	1	5	8.9603	7788	0	0	.	0	27.7	10	30	0	0.063
9	9	1	0	.	.	.	.	10	0	2	5	6.1779	482	0	0	.	0	27.7	10	30	0	0.063
9	9	1	0	.	.	.	.	3	0	1	6	9.0134	8212	0	0	.	0	27.7	10	30	0	0.063
9	9	1	0	.	.	.	.	10	0	2	6	6.2584	522.4	0	0	.	0	27.7	10	30	0	0.063
9	9	1	0	.	.	.	.	3	0	1	7	-2	-2	1	0	.	0	27.7	10	30	0	0.063
9	9	1	0	.	.	.	.	10	0	2	7	-2	-2	1	0	.	0	27.7	10	30	0	0.063
9	9	1	0	.	.	.	.	3	0	1	8	-2	-2	1	0	.	0	27.7	10	30	0	0.063
9	9	1	0	.	.	.	.	10	0	2	8	-2	-2	1	0	.	0	27.7	10	30	0	0.063
9	9	1	0	.	.	.	.	3	0	1	9	7.6871	2180	0	0	.	0	27.7	10	30	0	0.063
9	9	1	0	.	.	.	.	10	0	2	9	5.9457	382.1	0	0	.	0	27.7	10	30	0	0.063
9	9	1	0	.	.	.	.	3	0	1	10	-2	-2	1	0	.	0	27.7	10	30	0	0.063
9	9	1	0	.	.	.	.	10	0	2	10	-2	-2	1	0	.	0	27.7	10	30	0	0.063
9	9	1	0	.	.	.	.	3	0	1	11	-2	-2	1	0	.	0	27.7	10	30	0	0.063
9	9	1	0	.	.	.	.	10	0	2	11	-2	-2	1	0	.	0	27.7	10	30	0	0.063
9	9	1	0	.	.	.	.	3	0	1	12	7.3106	1496	0	0	.	0	27.7	10	30	0	0.063
9	9	1	0	.	.	.	.	10	0	2	12	5.7239	306.1	0	0	.	0	27.7	10	30	0	0.063
9	9	1	0	.	.	.	.	3	0	1	13	-2	-2	1	0	.	0	27.7	10	30	0	0.063
9	9	1	0	.	.	.	.	10	0	2	13	-2	-2	1	0	.	0	27.7	10	30	0	0.063
9	9	1	0	.	.	.	.	3	0	1	14	-2	-2	1	0	.	0	27.7	10	30	0	0.063
9	9	1	0	.	.	.	.	10	0	2	14	-2	-2	1	0	.	0	27.7	10	30	0	0.063
9	9	1	0	.	.	.	.	3	0	1	15	7.0579	1162	0	0	.	0	27.7	10	30	0	0.063
9	9	1	0	.	.	.	.	10	0	2	15	5.4744	238.5	0	0	.	0	27.7	10	30	0	0.063
9	9	1	0	.	.	.	.	3	0	1	16	-2	-2	1	0	.	0	27.7	10	30	0	0.063
9	9	1	0	.	.	.	.	10	0	2	16	-2	-2	1	0	.	0	27.7	10	30	0	0.063
9	9	1	0	.	.	.	.	3	0	1	17	-2	-2	1	0	.	0	27.7	10	30	0	0.063
9	9	1	0	.	.	.	.	10	0	2	17	-2	-2	1	0	.	0	27.7	10	30	0	0.063
9	9	1	0	.	.	.	.	3	0	1	18	7.5929	1984	0	0	.	0	27.7	10	30	0	0.063
9	9	1	0	.	.	.	.	10	0	2	18	5.3785	216.7	0	0	.	0	27.7	10	30	0	0.063
9	9	1	0	.	.	.	.	3	0	1	19	-2	-2	1	0	.	0	27.7	10	30	0	0.063
9	9	1	0	.	.	.	.	10	0	2	19	-2	-2	1	0	.	0	27.7	10	30	0	0.063
9	9	1	0	.	.	.	.	3	0	1	20	-2	-2	1	0	.	0	27.7	10	30	0	0.063
9	9	1	0	.	.	.	.	10	0	2	20	-2	-2	1	0	.	0	27.7	10	30	0	0.063
9	9	1	0	.	.	.	.	3	0	1	21	7.4605	1738	0	0	.	0	27.7	10	30	0	0.063
9	9	1	0	.	.	.	.	10	0	2	21	5.5797	265	0	0	.	0	27.7	10	30	0	0.063
9	9	1	0	.	.	.	.	3	0	1	22	-2	-2	1	0	.	0	27.7	10	30	0	0.063
9	9	1	0	.	.	.	.	10	0	2	22	-2	-2	1	0	.	0	27.7	10	30	0	0.063
9	9	1	0	.	.	.	.	3	0	1	23	-2	-2	1	0	.	0	27.7	10	30	0	0.063
9	9	1	0	.	.	.	.	10	0	2	23	-2	-2	1	0	.	0	27.7	10	30	0	0.063
9	9	1	0	.	.	.	.	3	0	1	24	7.5099	1826	0	0	.	0	27.7	10	30	0	0.063
9	9	1	0	.	.	.	.	10	0	2	24	5.4036	222.2	0	0	.	0	27.7	10	30	0	0.063
9	9	1	0	.	.	.	.	3	0	1	25	6.2066	496	0	0	.	0	27.7	10	30	0	0.063
9	9	1	0	.	.	.	.	10	0	2	25	5.2554	191.6	0	0	.	0	27.7	10	30	0	0.063
9	9	1	0	.	.	.	.	3	0	1	26	6.1985	492	0	0	.	0	27.7	10	30	0	0.063
9	9	1	0	.	.	.	.	10	0	2	26	5.4467	232	0	0	.	0	27.7	10	30	0	0.063
9	9	1	0	.	.	.	.	3	0	1	27	6.3561	576	0	0	.	0	27.7	10	30	0	0.063
9	9	1	0	.	.	.	.	10	0	2	27	5.5763	264.1	0	0	.	0	27.7	10	30	0	0.063
9	9	1	0	.	.	.	.	3	0	1	28	6.1985	492	0	0	.	0	27.7	10	30	0	0.063
9	9	1	0	.	.	.	.	10	0	2	28	5.4926	242.9	0	0	.	0	27.7	10	30	0	0.063
9	9	1	0	.	.	.	.	3	0	1	29	6.2691	528	0	0	.	0	27.7	10	30	0	0.063
9	9	1	0	.	.	.	.	10	0	2	29	5.5358	253.6	0	0	.	0	27.7	10	30	0	0.063
9	9	1	0	.	.	.	.	3	0	1	30	6.2729	530	0	0	.	0	27.7	10	30	0	0.063
9	9	1	0	.	.	.	.	10	0	2	30	5.624	277	0	0	.	0	27.7	10	30	0	0.063
10	10	1	1	187.2	187200	7.8	7800	1	1	0	0	-1	-1	1	0	.	0	31.2	10	30	0	0.25
10	10	1	1	187.2	187200	7.8	7800	2	1	0	0	-1	-1	1	0	.	0	31.2	10	30	0	0.25
10	10	1	1	.	.	.	.	3	0	1	0	5.2149	184	0	0	.	0	31.2	10	30	0	0.25
10	10	1	1	.	.	.	.	10	0	2	0	2.7973	16.4	0	0	.	0	31.2	10	30	0	0.25
10	10	1	1	.	.	.	.	3	0	1	1	9.0595	8600	0	0	.	0	31.2	10	30	0	0.25
10	10	1	1	.	.	.	.	10	0	2	1	4.8219	124.2	0	0	.	0	31.2	10	30	0	0.25
10	10	1	1	.	.	.	.	3	0	1	2	8.3589	4268	0	0	.	0	31.2	10	30	0	0.25
10	10	1	1	.	.	.	.	10	0	2	2	6.6171	747.8	0	0	.	0	31.2	10	30	0	0.25
10	10	1	1	.	.	.	.	3	0	1	3	7.1099	1224	0	0	.	0	31.2	10	30	0	0.25
10	10	1	1	.	.	.	.	10	0	2	3	5.9895	399.2	0	0	.	0	31.2	10	30	0	0.25
10	10	1	1	.	.	.	.	3	0	1	4	6.5653	710	0	0	.	0	31.2	10	30	0	0.25
10	10	1	1	.	.	.	.	10	0	2	4	5.5962	269.4	0	0	.	0	31.2	10	30	0	0.25
10	10	1	1	.	.	.	.	3	0	1	5	6.5013	666	0	0	.	0	31.2	10	30	0	0.25
10	10	1	1	.	.	.	.	10	0	2	5	5.6036	271.4	0	0	.	0	31.2	10	30	0	0.25
10	10	1	1	.	.	.	.	3	0	1	6	6.1442	466	0	0	.	0	31.2	10	30	0	0.25
10	10	1	1	.	.	.	.	10	0	2	6	5.3594	212.6	0	0	.	0	31.2	10	30	0	0.25
10	10	1	1	.	.	.	.	3	0	1	7	-2	-2	1	0	.	0	31.2	10	30	0	0.25
10	10	1	1	.	.	.	.	10	0	2	7	-2	-2	1	0	.	0	31.2	10	30	0	0.25
10	10	1	1	.	.	.	.	3	0	1	8	-2	-2	1	0	.	0	31.2	10	30	0	0.25
10	10	1	1	.	.	.	.	10	0	2	8	-2	-2	1	0	.	0	31.2	10	30	0	0.25
10	10	1	1	.	.	.	.	3	0	1	9	5.9081	368	0	0	.	0	31.2	10	30	0	0.25
10	10	1	1	.	.	.	.	10	0	2	9	5.0499	156	0	0	.	0	31.2	10	30	0	0.25
10	10	1	1	.	.	.	.	3	0	1	10	-2	-2	1	0	.	0	31.2	10	30	0	0.25
10	10	1	1	.	.	.	.	10	0	2	10	-2	-2	1	0	.	0	31.2	10	30	0	0.25
10	10	1	1	.	.	.	.	3	0	1	11	-2	-2	1	0	.	0	31.2	10	30	0	0.25
10	10	1	1	.	.	.	.	10	0	2	11	-2	-2	1	0	.	0	31.2	10	30	0	0.25
10	10	1	1	.	.	.	.	3	0	1	12	5.3566	212	0	0	.	0	31.2	10	30	0	0.25
10	10	1	1	.	.	.	.	10	0	2	12	4.557	95.3	0	0	.	0	31.2	10	30	0	0.25
10	10	1	1	.	.	.	.	3	0	1	13	-2	-2	1	0	.	0	31.2	10	30	0	0.25
10	10	1	1	.	.	.	.	10	0	2	13	-2	-2	1	0	.	0	31.2	10	30	0	0.25
10	10	1	1	.	.	.	.	3	0	1	14	-2	-2	1	0	.	0	31.2	10	30	0	0.25
10	10	1	1	.	.	.	.	10	0	2	14	-2	-2	1	0	.	0	31.2	10	30	0	0.25
10	10	1	1	.	.	.	.	3	0	1	15	5.193	180	0	0	.	0	31.2	10	30	0	0.25
10	10	1	1	.	.	.	.	10	0	2	15	4.2413	69.5	0	0	.	0	31.2	10	30	0	0.25
10	10	1	1	.	.	.	.	3	0	1	16	-2	-2	1	0	.	0	31.2	10	30	0	0.25
10	10	1	1	.	.	.	.	10	0	2	16	-2	-2	1	0	.	0	31.2	10	30	0	0.25
10	10	1	1	.	.	.	.	3	0	1	17	-2	-2	1	0	.	0	31.2	10	30	0	0.25
10	10	1	1	.	.	.	.	10	0	2	17	-2	-2	1	0	.	0	31.2	10	30	0	0.25
10	10	1	1	.	.	.	.	3	0	1	18	5.2983	200	0	0	.	0	31.2	10	30	0	0.25
10	10	1	1	.	.	.	.	10	0	2	18	4.4976	89.8	0	0	.	0	31.2	10	30	0	0.25
10	10	1	1	.	.	.	.	3	0	1	19	-2	-2	1	0	.	0	31.2	10	30	0	0.25
10	10	1	1	.	.	.	.	10	0	2	19	-2	-2	1	0	.	0	31.2	10	30	0	0.25
10	10	1	1	.	.	.	.	3	0	1	20	-2	-2	1	0	.	0	31.2	10	30	0	0.25
10	10	1	1	.	.	.	.	10	0	2	20	-2	-2	1	0	.	0	31.2	10	30	0	0.25
10	10	1	1	.	.	.	.	3	0	1	21	6.3801	590	0	0	.	0	31.2	10	30	0	0.25
10	10	1	1	.	.	.	.	10	0	2	21	4.0448	57.1	0	0	.	0	31.2	10	30	0	0.25
10	10	1	1	.	.	.	.	3	0	1	22	-2	-2	1	0	.	0	31.2	10	30	0	0.25
10	10	1	1	.	.	.	.	10	0	2	22	-2	-2	1	0	.	0	31.2	10	30	0	0.25
10	10	1	1	.	.	.	.	3	0	1	23	-2	-2	1	0	.	0	31.2	10	30	0	0.25
10	10	1	1	.	.	.	.	10	0	2	23	-2	-2	1	0	.	0	31.2	10	30	0	0.25
10	10	1	1	187.2	187200	31.2	31200	1	1	0	24	-1	-1	1	0	.	0	31.2	10	30	0	0.25
10	10	1	1	187.2	187200	31.2	31200	2	1	0	24	-1	-1	1	0	.	0	31.2	10	30	0	0.25
10	10	1	1	.	.	.	.	3	0	1	24	5.7104	302	0	0	.	0	31.2	10	30	0	0.25
10	10	1	1	.	.	.	.	10	0	2	24	4.4659	87	0	0	.	0	31.2	10	30	0	0.25
10	10	1	1	.	.	.	.	3	0	1	25	6.0544	426	0	0	.	0	31.2	10	30	0	0.25
10	10	1	1	.	.	.	.	10	0	2	25	5.238	188.3	0	0	.	0	31.2	10	30	0	0.25
10	10	1	1	.	.	.	.	3	0	1	26	6.0684	432	0	0	.	0	31.2	10	30	0	0.25
10	10	1	1	.	.	.	.	10	0	2	26	5.8696	354.1	0	0	.	0	31.2	10	30	0	0.25
10	10	1	1	.	.	.	.	3	0	1	27	5.7494	314	0	0	.	0	31.2	10	30	0	0.25
10	10	1	1	.	.	.	.	10	0	2	27	4.8418	126.7	0	0	.	0	31.2	10	30	0	0.25
10	10	1	1	.	.	.	.	3	0	1	28	5.4638	236	0	0	.	0	31.2	10	30	0	0.25
10	10	1	1	.	.	.	.	10	0	2	28	4.3618	78.4	0	0	.	0	31.2	10	30	0	0.25
10	10	1	1	.	.	.	.	3	0	1	29	5.5759	264	0	0	.	0	31.2	10	30	0	0.25
10	10	1	1	.	.	.	.	10	0	2	29	4.7122	111.3	0	0	.	0	31.2	10	30	0	0.25
10	10	1	1	.	.	.	.	3	0	1	30	5.5134	248	0	0	.	0	31.2	10	30	0	0.25
10	10	1	1	.	.	.	.	10	0	2	30	4.9863	146.4	0	0	.	0	31.2	10	30	0	0.25
11	11	1	1	178.8	178800	7.45	7450	1	1	0	0	-1	-1	1	0	.	0	29.8	10	30	0	0.25
11	11	1	1	178.8	178800	7.45	7450	2	1	0	0	-1	-1	1	0	.	0	29.8	10	30	0	0.25
11	11	1	1	.	.	.	.	3	0	1	0	6.8669	960	0	0	.	0	29.8	10	30	0	0.25
11	11	1	1	.	.	.	.	10	0	2	0	5.7034	299.9	0	0	.	0	29.8	10	30	0	0.25
11	11	1	1	.	.	.	.	3	0	1	1	10.2016	26946	0	0	.	0	29.8	10	30	0	0.25
11	11	1	1	.	.	.	.	10	0	2	1	5.6305	278.8	0	0	.	0	29.8	10	30	0	0.25
11	11	1	1	.	.	.	.	3	0	1	2	8.9736	7892	0	0	.	0	29.8	10	30	0	0.25
11	11	1	1	.	.	.	.	10	0	2	2	7.2076	1349.7	0	0	.	0	29.8	10	30	0	0.25
11	11	1	1	.	.	.	.	3	0	1	3	7.9266	2770	0	0	.	0	29.8	10	30	0	0.25
11	11	1	1	.	.	.	.	10	0	2	3	7.2524	1411.5	0	0	.	0	29.8	10	30	0	0.25
11	11	1	1	.	.	.	.	3	0	1	4	7.7424	2304	0	0	.	0	29.8	10	30	0	0.25
11	11	1	1	.	.	.	.	10	0	2	4	6.8739	966.7	0	0	.	0	29.8	10	30	0	0.25
11	11	1	1	.	.	.	.	3	0	1	5	7.5219	1848	0	0	.	0	29.8	10	30	0	0.25
11	11	1	1	.	.	.	.	10	0	2	5	6.5984	733.9	0	0	.	0	29.8	10	30	0	0.25
11	11	1	1	.	.	.	.	3	0	1	6	7.2064	1348	0	0	.	0	29.8	10	30	0	0.25
11	11	1	1	.	.	.	.	10	0	2	6	6.5751	717	0	0	.	0	29.8	10	30	0	0.25
11	11	1	1	.	.	.	.	3	0	1	7	-2	-2	1	0	.	0	29.8	10	30	0	0.25
11	11	1	1	.	.	.	.	10	0	2	7	-2	-2	1	0	.	0	29.8	10	30	0	0.25
11	11	1	1	.	.	.	.	3	0	1	8	-2	-2	1	0	.	0	29.8	10	30	0	0.25
11	11	1	1	.	.	.	.	10	0	2	8	-2	-2	1	0	.	0	29.8	10	30	0	0.25
11	11	1	1	.	.	.	.	3	0	1	9	6.8957	988	0	0	.	0	29.8	10	30	0	0.25
11	11	1	1	.	.	.	.	10	0	2	9	6.0417	420.6	0	0	.	0	29.8	10	30	0	0.25
11	11	1	1	.	.	.	.	3	0	1	10	-2	-2	1	0	.	0	29.8	10	30	0	0.25
11	11	1	1	.	.	.	.	10	0	2	10	-2	-2	1	0	.	0	29.8	10	30	0	0.25
11	11	1	1	.	.	.	.	3	0	1	11	-2	-2	1	0	.	0	29.8	10	30	0	0.25
11	11	1	1	.	.	.	.	10	0	2	11	-2	-2	1	0	.	0	29.8	10	30	0	0.25
11	11	1	1	.	.	.	.	3	0	1	12	6.8395	934	0	0	.	0	29.8	10	30	0	0.25
11	11	1	1	.	.	.	.	10	0	2	12	6.1944	490	0	0	.	0	29.8	10	30	0	0.25
11	11	1	1	.	.	.	.	3	0	1	13	-2	-2	1	0	.	0	29.8	10	30	0	0.25
11	11	1	1	.	.	.	.	10	0	2	13	-2	-2	1	0	.	0	29.8	10	30	0	0.25
11	11	1	1	.	.	.	.	3	0	1	14	-2	-2	1	0	.	0	29.8	10	30	0	0.25
11	11	1	1	.	.	.	.	10	0	2	14	-2	-2	1	0	.	0	29.8	10	30	0	0.25
11	11	1	1	.	.	.	.	3	0	1	15	6.8287	924	0	0	.	0	29.8	10	30	0	0.25
11	11	1	1	.	.	.	.	10	0	2	15	5.8269	339.3	0	0	.	0	29.8	10	30	0	0.25
11	11	1	1	.	.	.	.	3	0	1	16	-2	-2	1	0	.	0	29.8	10	30	0	0.25
11	11	1	1	.	.	.	.	10	0	2	16	-2	-2	1	0	.	0	29.8	10	30	0	0.25
11	11	1	1	.	.	.	.	3	0	1	17	-2	-2	1	0	.	0	29.8	10	30	0	0.25
11	11	1	1	.	.	.	.	10	0	2	17	-2	-2	1	0	.	0	29.8	10	30	0	0.25
11	11	1	1	.	.	.	.	3	0	1	18	6.8835	976	0	0	.	0	29.8	10	30	0	0.25
11	11	1	1	.	.	.	.	10	0	2	18	6.1944	490	0	0	.	0	29.8	10	30	0	0.25
11	11	1	1	.	.	.	.	3	0	1	19	-2	-2	1	0	.	0	29.8	10	30	0	0.25
11	11	1	1	.	.	.	.	10	0	2	19	-2	-2	1	0	.	0	29.8	10	30	0	0.25
11	11	1	1	.	.	.	.	3	0	1	20	-2	-2	1	0	.	0	29.8	10	30	0	0.25
11	11	1	1	.	.	.	.	10	0	2	20	-2	-2	1	0	.	0	29.8	10	30	0	0.25
11	11	1	1	.	.	.	.	3	0	1	21	6.1003	446	0	0	.	0	29.8	10	30	0	0.25
11	11	1	1	.	.	.	.	10	0	2	21	5.7301	308	0	0	.	0	29.8	10	30	0	0.25
11	11	1	1	.	.	.	.	3	0	1	22	-2	-2	1	0	.	0	29.8	10	30	0	0.25
11	11	1	1	.	.	.	.	10	0	2	22	-2	-2	1	0	.	0	29.8	10	30	0	0.25
11	11	1	1	.	.	.	.	3	0	1	23	-2	-2	1	0	.	0	29.8	10	30	0	0.25
11	11	1	1	.	.	.	.	10	0	2	23	-2	-2	1	0	.	0	29.8	10	30	0	0.25
11	11	1	1	178.8	178800	29.8	29800	1	1	0	24	-1	-1	1	0	.	0	29.8	10	30	0	0.25
11	11	1	1	178.8	178800	29.8	29800	2	1	0	24	-1	-1	1	0	.	0	29.8	10	30	0	0.25
11	11	1	1	.	.	.	.	3	0	1	24	5.9814	396	0	0	.	0	29.8	10	30	0	0.25
11	11	1	1	.	.	.	.	10	0	2	24	5.8805	358	0	0	.	0	29.8	10	30	0	0.25
11	11	1	1	.	.	.	.	3	0	1	25	6.0497	424	0	0	.	0	29.8	10	30	0	0.25
11	11	1	1	.	.	.	.	10	0	2	25	5.8156	335.5	0	0	.	0	29.8	10	30	0	0.25
11	11	1	1	.	.	.	.	3	0	1	26	7.3702	1588	0	0	.	0	29.8	10	30	0	0.25
11	11	1	1	.	.	.	.	10	0	2	26	6.1364	462.4	0	0	.	0	29.8	10	30	0	0.25
11	11	1	1	.	.	.	.	3	0	1	27	6.0591	428	0	0	.	0	29.8	10	30	0	0.25
11	11	1	1	.	.	.	.	10	0	2	27	6.1629	474.8	0	0	.	0	29.8	10	30	0	0.25
11	11	1	1	.	.	.	.	3	0	1	28	6.0355	418	0	0	.	0	29.8	10	30	0	0.25
11	11	1	1	.	.	.	.	10	0	2	28	5.8905	361.6	0	0	.	0	29.8	10	30	0	0.25
11	11	1	1	.	.	.	.	3	0	1	29	6.0307	416	0	0	.	0	29.8	10	30	0	0.25
11	11	1	1	.	.	.	.	10	0	2	29	5.717	304	0	0	.	0	29.8	10	30	0	0.25
11	11	1	1	.	.	.	.	3	0	1	30	6.0307	416	0	0	.	0	29.8	10	30	0	0.25
11	11	1	1	.	.	.	.	10	0	2	30	5.838	343.1	0	0	.	0	29.8	10	30	0	0.25
12	12	1	1	171	171000	7.125	7125	1	1	0	0	-1	-1	1	0	.	0	28.5	10	30	0	0.25
12	12	1	1	171	171000	7.125	7125	2	1	0	0	-1	-1	1	0	.	0	28.5	10	30	0	0.25
12	12	1	1	.	.	.	.	3	0	1	0	7.8144	2476	0	0	.	0	28.5	10	30	0	0.25
12	12	1	1	.	.	.	.	10	0	2	0	5.033	153.4	0	0	.	0	28.5	10	30	0	0.25
12	12	1	1	.	.	.	.	3	0	1	1	8.9256	7522	0	0	.	0	28.5	10	30	0	0.25
12	12	1	1	.	.	.	.	10	0	2	1	5.8024	331.1	0	0	.	0	28.5	10	30	0	0.25
12	12	1	1	.	.	.	.	3	0	1	2	8.6858	5918	0	0	.	0	28.5	10	30	0	0.25
12	12	1	1	.	.	.	.	10	0	2	2	6.861	954.3	0	0	.	0	28.5	10	30	0	0.25
12	12	1	1	.	.	.	.	3	0	1	3	7.7732	2376	0	0	.	0	28.5	10	30	0	0.25
12	12	1	1	.	.	.	.	10	0	2	3	6.4062	605.6	0	0	.	0	28.5	10	30	0	0.25
12	12	1	1	.	.	.	.	3	0	1	4	7.1608	1288	0	0	.	0	28.5	10	30	0	0.25
12	12	1	1	.	.	.	.	10	0	2	4	5.7157	303.6	0	0	.	0	28.5	10	30	0	0.25
12	12	1	1	.	.	.	.	3	0	1	5	7.0246	1124	0	0	.	0	28.5	10	30	0	0.25
12	12	1	1	.	.	.	.	10	0	2	5	5.5797	265	0	0	.	0	28.5	10	30	0	0.25
12	12	1	1	.	.	.	.	3	0	1	6	7.4685	1752	0	0	.	0	28.5	10	30	0	0.25
12	12	1	1	.	.	.	.	10	0	2	6	6.1295	459.2	0	0	.	0	28.5	10	30	0	0.25
12	12	1	1	.	.	.	.	3	0	1	7	-2	-2	1	0	.	0	28.5	10	30	0	0.25
12	12	1	1	.	.	.	.	10	0	2	7	-2	-2	1	0	.	0	28.5	10	30	0	0.25
12	12	1	1	.	.	.	.	3	0	1	8	-2	-2	1	0	.	0	28.5	10	30	0	0.25
12	12	1	1	.	.	.	.	10	0	2	8	-2	-2	1	0	.	0	28.5	10	30	0	0.25
12	12	1	1	.	.	.	.	3	0	1	9	6.6995	812	0	0	.	0	28.5	10	30	0	0.25
12	12	1	1	.	.	.	.	10	0	2	9	5.5992	270.2	0	0	.	0	28.5	10	30	0	0.25
12	12	1	1	.	.	.	.	3	0	1	10	-2	-2	1	0	.	0	28.5	10	30	0	0.25
12	12	1	1	.	.	.	.	10	0	2	10	-2	-2	1	0	.	0	28.5	10	30	0	0.25
12	12	1	1	.	.	.	.	3	0	1	11	-2	-2	1	0	.	0	28.5	10	30	0	0.25
12	12	1	1	.	.	.	.	10	0	2	11	-2	-2	1	0	.	0	28.5	10	30	0	0.25
12	12	1	1	.	.	.	.	3	0	1	12	6.2691	528	0	0	.	0	28.5	10	30	0	0.25
12	12	1	1	.	.	.	.	10	0	2	12	5.2247	185.8	0	0	.	0	28.5	10	30	0	0.25
12	12	1	1	.	.	.	.	3	0	1	13	-2	-2	1	0	.	0	28.5	10	30	0	0.25
12	12	1	1	.	.	.	.	10	0	2	13	-2	-2	1	0	.	0	28.5	10	30	0	0.25
12	12	1	1	.	.	.	.	3	0	1	14	-2	-2	1	0	.	0	28.5	10	30	0	0.25
12	12	1	1	.	.	.	.	10	0	2	14	-2	-2	1	0	.	0	28.5	10	30	0	0.25
12	12	1	1	.	.	.	.	3	0	1	15	6.1903	488	0	0	.	0	28.5	10	30	0	0.25
12	12	1	1	.	.	.	.	10	0	2	15	4.9712	144.2	0	0	.	0	28.5	10	30	0	0.25
12	12	1	1	.	.	.	.	3	0	1	16	-2	-2	1	0	.	0	28.5	10	30	0	0.25
12	12	1	1	.	.	.	.	10	0	2	16	-2	-2	1	0	.	0	28.5	10	30	0	0.25
12	12	1	1	.	.	.	.	3	0	1	17	-2	-2	1	0	.	0	28.5	10	30	0	0.25
12	12	1	1	.	.	.	.	10	0	2	17	-2	-2	1	0	.	0	28.5	10	30	0	0.25
12	12	1	1	.	.	.	.	3	0	1	18	6.2538	520	0	0	.	0	28.5	10	30	0	0.25
12	12	1	1	.	.	.	.	10	0	2	18	5.193	180	0	0	.	0	28.5	10	30	0	0.25
12	12	1	1	.	.	.	.	3	0	1	19	-2	-2	1	0	.	0	28.5	10	30	0	0.25
12	12	1	1	.	.	.	.	10	0	2	19	-2	-2	1	0	.	0	28.5	10	30	0	0.25
12	12	1	1	.	.	.	.	3	0	1	20	-2	-2	1	0	.	0	28.5	10	30	0	0.25
12	12	1	1	.	.	.	.	10	0	2	20	-2	-2	1	0	.	0	28.5	10	30	0	0.25
12	12	1	1	.	.	.	.	3	0	1	21	5.112	166	0	0	.	0	28.5	10	30	0	0.25
12	12	1	1	.	.	.	.	10	0	2	21	5.5599	259.8	0	0	.	0	28.5	10	30	0	0.25
12	12	1	1	.	.	.	.	3	0	1	22	-2	-2	1	0	.	0	28.5	10	30	0	0.25
12	12	1	1	.	.	.	.	10	0	2	22	-2	-2	1	0	.	0	28.5	10	30	0	0.25
12	12	1	1	.	.	.	.	3	0	1	23	-2	-2	1	0	.	0	28.5	10	30	0	0.25
12	12	1	1	.	.	.	.	10	0	2	23	-2	-2	1	0	.	0	28.5	10	30	0	0.25
12	12	1	1	171	171000	28.5	28500	1	1	0	24	-1	-1	1	0	.	0	28.5	10	30	0	0.25
12	12	1	1	171	171000	28.5	28500	2	1	0	24	-1	-1	1	0	.	0	28.5	10	30	0	0.25
12	12	1	1	.	.	.	.	3	0	1	24	5.8406	344	0	0	.	0	28.5	10	30	0	0.25
12	12	1	1	.	.	.	.	10	0	2	24	4.8567	128.6	0	0	.	0	28.5	10	30	0	0.25
12	12	1	1	.	.	.	.	3	0	1	25	5.193	180	0	0	.	0	28.5	10	30	0	0.25
12	12	1	1	.	.	.	.	10	0	2	25	4.9273	138	0	0	.	0	28.5	10	30	0	0.25
12	12	1	1	.	.	.	.	3	0	1	26	5.247	190	0	0	.	0	28.5	10	30	0	0.25
12	12	1	1	.	.	.	.	10	0	2	26	4.7791	119	0	0	.	0	28.5	10	30	0	0.25
12	12	1	1	.	.	.	.	3	0	1	27	5.247	190	0	0	.	0	28.5	10	30	0	0.25
12	12	1	1	.	.	.	.	10	0	2	27	4.6923	109.1	0	0	.	0	28.5	10	30	0	0.25
12	12	1	1	.	.	.	.	3	0	1	28	5.2575	192	0	0	.	0	28.5	10	30	0	0.25
12	12	1	1	.	.	.	.	10	0	2	28	4.9495	141.1	0	0	.	0	28.5	10	30	0	0.25
12	12	1	1	.	.	.	.	3	0	1	29	5.6058	272	0	0	.	0	28.5	10	30	0	0.25
12	12	1	1	.	.	.	.	10	0	2	29	5.3395	208.4	0	0	.	0	28.5	10	30	0	0.25
12	12	1	1	.	.	.	.	3	0	1	30	6.2066	496	0	0	.	0	28.5	10	30	0	0.25
12	12	1	1	.	.	.	.	10	0	2	30	4.8057	122.2	0	0	.	0	28.5	10	30	0	0.25
13	13	1	4	165	165000	6.875	6875	1	1	0	0	-1	-1	1	0	.	0	27.5	10	30	0	0.25
13	13	1	4	165	165000	6.875	6875	2	1	0	0	-1	-1	1	0	.	0	27.5	10	30	0	0.25
13	13	1	4	.	.	.	.	3	0	1	0	6.5568	704	0	0	.	0	27.5	10	30	0	0.25
13	13	1	4	.	.	.	.	10	0	2	0	3.6763	39.5	0	0	.	0	27.5	10	30	0	0.25
13	13	1	4	.	.	.	.	3	0	1	1	9.5103	13498	0	0	.	0	27.5	10	30	0	0.25
13	13	1	4	.	.	.	.	10	0	2	1	6.1868	486.3	0	0	.	0	27.5	10	30	0	0.25
13	13	1	4	.	.	.	.	3	0	1	2	10.2525	28354	0	0	.	0	27.5	10	30	0	0.25
13	13	1	4	.	.	.	.	10	0	2	2	7.3543	1562.9	0	0	.	0	27.5	10	30	0	0.25
13	13	1	4	.	.	.	.	3	0	1	3	8.3719	4324	0	0	.	0	27.5	10	30	0	0.25
13	13	1	4	.	.	.	.	10	0	2	3	7.34	1540.7	0	0	.	0	27.5	10	30	0	0.25
13	13	1	4	.	.	.	.	3	0	1	4	7.5704	1940	0	0	.	0	27.5	10	30	0	0.25
13	13	1	4	.	.	.	.	10	0	2	4	7.0901	1200	0	0	.	0	27.5	10	30	0	0.25
13	13	1	4	.	.	.	.	3	0	1	5	7.3639	1578	0	0	.	0	27.5	10	30	0	0.25
13	13	1	4	.	.	.	.	10	0	2	5	6.9103	1002.5	0	0	.	0	27.5	10	30	0	0.25
13	13	1	4	.	.	.	.	3	0	1	6	7.2654	1430	0	0	.	0	27.5	10	30	0	0.25
13	13	1	4	.	.	.	.	10	0	2	6	6.5482	698	0	0	.	0	27.5	10	30	0	0.25
13	13	1	4	.	.	.	.	3	0	1	7	-2	-2	1	0	.	0	27.5	10	30	0	0.25
13	13	1	4	.	.	.	.	10	0	2	7	-2	-2	1	0	.	0	27.5	10	30	0	0.25
13	13	1	4	.	.	.	.	3	0	1	8	-2	-2	1	0	.	0	27.5	10	30	0	0.25
13	13	1	4	.	.	.	.	10	0	2	8	-2	-2	1	0	.	0	27.5	10	30	0	0.25
13	13	1	4	.	.	.	.	3	0	1	9	6.6359	762	0	0	.	0	27.5	10	30	0	0.25
13	13	1	4	.	.	.	.	10	0	2	9	5.2837	197.1	0	0	.	0	27.5	10	30	0	0.25
13	13	1	4	.	.	.	.	3	0	1	10	-2	-2	1	0	.	0	27.5	10	30	0	0.25
13	13	1	4	.	.	.	.	10	0	2	10	-2	-2	1	0	.	0	27.5	10	30	0	0.25
13	13	1	4	.	.	.	.	3	0	1	11	-2	-2	1	0	.	0	27.5	10	30	0	0.25
13	13	1	4	.	.	.	.	10	0	2	11	-2	-2	1	0	.	0	27.5	10	30	0	0.25
13	13	1	4	.	.	.	.	3	0	1	12	5.8972	364	0	0	.	0	27.5	10	30	0	0.25
13	13	1	4	.	.	.	.	10	0	2	12	5.0938	163	0	0	.	0	27.5	10	30	0	0.25
13	13	1	4	.	.	.	.	3	0	1	13	-2	-2	1	0	.	0	27.5	10	30	0	0.25
13	13	1	4	.	.	.	.	10	0	2	13	-2	-2	1	0	.	0	27.5	10	30	0	0.25
13	13	1	4	.	.	.	.	3	0	1	14	-2	-2	1	0	.	0	27.5	10	30	0	0.25
13	13	1	4	.	.	.	.	10	0	2	14	-2	-2	1	0	.	0	27.5	10	30	0	0.25
13	13	1	4	.	.	.	.	3	0	1	15	5.5294	252	0	0	.	0	27.5	10	30	0	0.25
13	13	1	4	.	.	.	.	10	0	2	15	4.8858	132.4	0	0	.	0	27.5	10	30	0	0.25
13	13	1	4	.	.	.	.	3	0	1	16	-2	-2	1	0	.	0	27.5	10	30	0	0.25
13	13	1	4	.	.	.	.	10	0	2	16	-2	-2	1	0	.	0	27.5	10	30	0	0.25
13	13	1	4	.	.	.	.	3	0	1	17	-2	-2	1	0	.	0	27.5	10	30	0	0.25
13	13	1	4	.	.	.	.	10	0	2	17	-2	-2	1	0	.	0	27.5	10	30	0	0.25
13	13	1	4	.	.	.	.	3	0	1	18	5.5134	248	0	0	.	0	27.5	10	30	0	0.25
13	13	1	4	.	.	.	.	10	0	2	18	4.4543	86	0	0	.	0	27.5	10	30	0	0.25
13	13	1	4	.	.	.	.	3	0	1	19	-2	-2	1	0	.	0	27.5	10	30	0	0.25
13	13	1	4	.	.	.	.	10	0	2	19	-2	-2	1	0	.	0	27.5	10	30	0	0.25
13	13	1	4	.	.	.	.	3	0	1	20	-2	-2	1	0	.	0	27.5	10	30	0	0.25
13	13	1	4	.	.	.	.	10	0	2	20	-2	-2	1	0	.	0	27.5	10	30	0	0.25
13	13	1	4	.	.	.	.	3	0	1	21	5.4723	238	0	0	.	0	27.5	10	30	0	0.25
13	13	1	4	.	.	.	.	10	0	2	21	4.4212	83.2	0	0	.	0	27.5	10	30	0	0.25
13	13	1	4	.	.	.	.	3	0	1	22	-2	-2	1	0	.	0	27.5	10	30	0	0.25
13	13	1	4	.	.	.	.	10	0	2	22	-2	-2	1	0	.	0	27.5	10	30	0	0.25
13	13	1	4	.	.	.	.	3	0	1	23	-2	-2	1	0	.	0	27.5	10	30	0	0.25
13	13	1	4	.	.	.	.	10	0	2	23	-2	-2	1	0	.	0	27.5	10	30	0	0.25
13	13	1	4	660	660000	110	110000	1	1	0	24	-1	-1	1	0	.	0	27.5	10	30	0	0.25
13	13	1	4	660	660000	110	110000	2	1	0	24	-1	-1	1	0	.	0	27.5	10	30	0	0.25
13	13	1	4	.	.	.	.	3	0	1	24	6.0591	428	0	0	.	0	27.5	10	30	0	0.25
13	13	1	4	.	.	.	.	10	0	2	24	4.4875	88.9	0	0	.	0	27.5	10	30	0	0.25
13	13	1	4	.	.	.	.	3	0	1	25	6.0776	436	0	0	.	0	27.5	10	30	0	0.25
13	13	1	4	.	.	.	.	10	0	2	25	4.7104	111.1	0	0	.	0	27.5	10	30	0	0.25
13	13	1	4	.	.	.	.	3	0	1	26	6.5681	712	0	0	.	0	27.5	10	30	0	0.25
13	13	1	4	.	.	.	.	10	0	2	26	5.8198	336.9	0	0	.	0	27.5	10	30	0	0.25
13	13	1	4	.	.	.	.	3	0	1	27	6.649	772	0	0	.	0	27.5	10	30	0	0.25
13	13	1	4	.	.	.	.	10	0	2	27	6.5911	728.6	0	0	.	0	27.5	10	30	0	0.25
13	13	1	4	.	.	.	.	3	0	1	28	6.5453	696	0	0	.	0	27.5	10	30	0	0.25
13	13	1	4	.	.	.	.	10	0	2	28	7.1697	1299.4	0	0	.	0	27.5	10	30	0	0.25
13	13	1	4	.	.	.	.	3	0	1	29	6.628	756	0	0	.	0	27.5	10	30	0	0.25
13	13	1	4	.	.	.	.	10	0	2	29	7.4751	1763.5	0	0	.	0	27.5	10	30	0	0.25
13	13	1	4	.	.	.	.	3	0	1	30	6.5396	692	0	0	.	0	27.5	10	30	0	0.25
13	13	1	4	.	.	.	.	10	0	2	30	7.6521	2105	0	0	.	0	27.5	10	30	0	0.25
14	14	1	4	159	159000	6.625	6625	1	1	0	0	-1	-1	1	0	.	0	26.5	10	30	0	0.25
14	14	1	4	159	159000	6.625	6625	2	1	0	0	-1	-1	1	0	.	0	26.5	10	30	0	0.25
14	14	1	4	.	.	.	.	3	0	1	0	5.6276	278	0	0	.	0	26.5	10	30	0	0.25
14	14	1	4	.	.	.	.	10	0	2	0	3.904	49.6	0	0	.	0	26.5	10	30	0	0.25
14	14	1	4	.	.	.	.	3	0	1	1	10.15	25590	0	0	.	0	26.5	10	30	0	0.25
14	14	1	4	.	.	.	.	10	0	2	1	6.4618	640.2	0	0	.	0	26.5	10	30	0	0.25
14	14	1	4	.	.	.	.	3	0	1	2	9.8517	18990	0	0	.	0	26.5	10	30	0	0.25
14	14	1	4	.	.	.	.	10	0	2	2	7.726	2266.5	0	0	.	0	26.5	10	30	0	0.25
14	14	1	4	.	.	.	.	3	0	1	3	8.349	4226	0	0	.	0	26.5	10	30	0	0.25
14	14	1	4	.	.	.	.	10	0	2	3	7.3602	1572.2	0	0	.	0	26.5	10	30	0	0.25
14	14	1	4	.	.	.	.	3	0	1	4	7.3132	1500	0	0	.	0	26.5	10	30	0	0.25
14	14	1	4	.	.	.	.	10	0	2	4	7.3508	1557.4	0	0	.	0	26.5	10	30	0	0.25
14	14	1	4	.	.	.	.	3	0	1	5	7.3803	1604	0	0	.	0	26.5	10	30	0	0.25
14	14	1	4	.	.	.	.	10	0	2	5	7.3472	1551.8	0	0	.	0	26.5	10	30	0	0.25
14	14	1	4	.	.	.	.	3	0	1	6	8.0104	3012	0	0	.	0	26.5	10	30	0	0.25
14	14	1	4	.	.	.	.	10	0	2	6	7.2153	1360.1	0	0	.	0	26.5	10	30	0	0.25
14	14	1	4	.	.	.	.	3	0	1	7	-2	-2	1	0	.	0	26.5	10	30	0	0.25
14	14	1	4	.	.	.	.	10	0	2	7	-2	-2	1	0	.	0	26.5	10	30	0	0.25
14	14	1	4	.	.	.	.	3	0	1	8	-2	-2	1	0	.	0	26.5	10	30	0	0.25
14	14	1	4	.	.	.	.	10	0	2	8	-2	-2	1	0	.	0	26.5	10	30	0	0.25
14	14	1	4	.	.	.	.	3	0	1	9	7.5517	1904	0	0	.	0	26.5	10	30	0	0.25
14	14	1	4	.	.	.	.	10	0	2	9	6.7224	830.8	0	0	.	0	26.5	10	30	0	0.25
14	14	1	4	.	.	.	.	3	0	1	10	-2	-2	1	0	.	0	26.5	10	30	0	0.25
14	14	1	4	.	.	.	.	10	0	2	10	-2	-2	1	0	.	0	26.5	10	30	0	0.25
14	14	1	4	.	.	.	.	3	0	1	11	-2	-2	1	0	.	0	26.5	10	30	0	0.25
14	14	1	4	.	.	.	.	10	0	2	11	-2	-2	1	0	.	0	26.5	10	30	0	0.25
14	14	1	4	.	.	.	.	3	0	1	12	7.1229	1240	0	0	.	0	26.5	10	30	0	0.25
14	14	1	4	.	.	.	.	10	0	2	12	5.9496	383.6	0	0	.	0	26.5	10	30	0	0.25
14	14	1	4	.	.	.	.	3	0	1	13	-2	-2	1	0	.	0	26.5	10	30	0	0.25
14	14	1	4	.	.	.	.	10	0	2	13	-2	-2	1	0	.	0	26.5	10	30	0	0.25
14	14	1	4	.	.	.	.	3	0	1	14	-2	-2	1	0	.	0	26.5	10	30	0	0.25
14	14	1	4	.	.	.	.	10	0	2	14	-2	-2	1	0	.	0	26.5	10	30	0	0.25
14	14	1	4	.	.	.	.	3	0	1	15	6.4892	658	0	0	.	0	26.5	10	30	0	0.25
14	14	1	4	.	.	.	.	10	0	2	15	5.4777	239.3	0	0	.	0	26.5	10	30	0	0.25
14	14	1	4	.	.	.	.	3	0	1	16	-2	-2	1	0	.	0	26.5	10	30	0	0.25
14	14	1	4	.	.	.	.	10	0	2	16	-2	-2	1	0	.	0	26.5	10	30	0	0.25
14	14	1	4	.	.	.	.	3	0	1	17	-2	-2	1	0	.	0	26.5	10	30	0	0.25
14	14	1	4	.	.	.	.	10	0	2	17	-2	-2	1	0	.	0	26.5	10	30	0	0.25
14	14	1	4	.	.	.	.	3	0	1	18	6.4329	622	0	0	.	0	26.5	10	30	0	0.25
14	14	1	4	.	.	.	.	10	0	2	18	5.1941	180.2	0	0	.	0	26.5	10	30	0	0.25
14	14	1	4	.	.	.	.	3	0	1	19	-2	-2	1	0	.	0	26.5	10	30	0	0.25
14	14	1	4	.	.	.	.	10	0	2	19	-2	-2	1	0	.	0	26.5	10	30	0	0.25
14	14	1	4	.	.	.	.	3	0	1	20	-2	-2	1	0	.	0	26.5	10	30	0	0.25
14	14	1	4	.	.	.	.	10	0	2	20	-2	-2	1	0	.	0	26.5	10	30	0	0.25
14	14	1	4	.	.	.	.	3	0	1	21	6.2804	534	0	0	.	0	26.5	10	30	0	0.25
14	14	1	4	.	.	.	.	10	0	2	21	5.0133	150.4	0	0	.	0	26.5	10	30	0	0.25
14	14	1	4	.	.	.	.	3	0	1	22	-2	-2	1	0	.	0	26.5	10	30	0	0.25
14	14	1	4	.	.	.	.	10	0	2	22	-2	-2	1	0	.	0	26.5	10	30	0	0.25
14	14	1	4	.	.	.	.	3	0	1	23	-2	-2	1	0	.	0	26.5	10	30	0	0.25
14	14	1	4	.	.	.	.	10	0	2	23	-2	-2	1	0	.	0	26.5	10	30	0	0.25
14	14	1	4	636	636000	106	106000	1	1	0	24	-1	-1	1	0	.	0	26.5	10	30	0	0.25
14	14	1	4	636	636000	106	106000	2	1	0	24	-1	-1	1	0	.	0	26.5	10	30	0	0.25
14	14	1	4	.	.	.	.	3	0	1	24	6.2804	534	0	0	.	0	26.5	10	30	0	0.25
14	14	1	4	.	.	.	.	10	0	2	24	4.9607	142.7	0	0	.	0	26.5	10	30	0	0.25
14	14	1	4	.	.	.	.	3	0	1	25	7.3576	1568	0	0	.	0	26.5	10	30	0	0.25
14	14	1	4	.	.	.	.	10	0	2	25	5.6348	280	0	0	.	0	26.5	10	30	0	0.25
14	14	1	4	.	.	.	.	3	0	1	26	7.1869	1322	0	0	.	0	26.5	10	30	0	0.25
14	14	1	4	.	.	.	.	10	0	2	26	6.7623	864.6	0	0	.	0	26.5	10	30	0	0.25
14	14	1	4	.	.	.	.	3	0	1	27	6.9622	1056	0	0	.	0	26.5	10	30	0	0.25
14	14	1	4	.	.	.	.	10	0	2	27	6.7359	842.1	0	0	.	0	26.5	10	30	0	0.25
14	14	1	4	.	.	.	.	3	0	1	28	7.3132	1500	0	0	.	0	26.5	10	30	0	0.25
14	14	1	4	.	.	.	.	10	0	2	28	7.2934	1470.6	0	0	.	0	26.5	10	30	0	0.25
14	14	1	4	.	.	.	.	3	0	1	29	7.1148	1230	0	0	.	0	26.5	10	30	0	0.25
14	14	1	4	.	.	.	.	10	0	2	29	7.7597	2344.2	0	0	.	0	26.5	10	30	0	0.25
14	14	1	4	.	.	.	.	3	0	1	30	7.3065	1490	0	0	.	0	26.5	10	30	0	0.25
14	14	1	4	.	.	.	.	10	0	2	30	7.8301	2515.1	0	0	.	0	26.5	10	30	0	0.25
15	15	1	4	188.4	188400	7.85	7850	1	1	0	0	-1	-1	1	0	.	0	31.4	10	30	0	0.25
15	15	1	4	188.4	188400	7.85	7850	2	1	0	0	-1	-1	1	0	.	0	31.4	10	30	0	0.25
15	15	1	4	.	.	.	.	3	0	1	0	5.1475	172	0	0	.	0	31.4	10	30	0	0.25
15	15	1	4	.	.	.	.	10	0	2	0	3.6763	39.5	0	0	.	0	31.4	10	30	0	0.25
15	15	1	4	.	.	.	.	3	0	1	1	9.2774	10694	0	0	.	0	31.4	10	30	0	0.25
15	15	1	4	.	.	.	.	10	0	2	1	5.3863	218.4	0	0	.	0	31.4	10	30	0	0.25
15	15	1	4	.	.	.	.	3	0	1	2	8.5934	5396	0	0	.	0	31.4	10	30	0	0.25
15	15	1	4	.	.	.	.	10	0	2	2	6.7133	823.3	0	0	.	0	31.4	10	30	0	0.25
15	15	1	4	.	.	.	.	3	0	1	3	8.4407	4632	0	0	.	0	31.4	10	30	0	0.25
15	15	1	4	.	.	.	.	10	0	2	3	5.8325	341.2	0	0	.	0	31.4	10	30	0	0.25
15	15	1	4	.	.	.	.	3	0	1	4	7.9084	2720	0	0	.	0	31.4	10	30	0	0.25
15	15	1	4	.	.	.	.	10	0	2	4	5.5061	246.2	0	0	.	0	31.4	10	30	0	0.25
15	15	1	4	.	.	.	.	3	0	1	5	7.2152	1360	0	0	.	0	31.4	10	30	0	0.25
15	15	1	4	.	.	.	.	10	0	2	5	5.5857	266.6	0	0	.	0	31.4	10	30	0	0.25
15	15	1	4	.	.	.	.	3	0	1	6	6.8565	950	0	0	.	0	31.4	10	30	0	0.25
15	15	1	4	.	.	.	.	10	0	2	6	5.5247	250.8	0	0	.	0	31.4	10	30	0	0.25
15	15	1	4	.	.	.	.	3	0	1	7	-2	-2	1	0	.	0	31.4	10	30	0	0.25
15	15	1	4	.	.	.	.	10	0	2	7	-2	-2	1	0	.	0	31.4	10	30	0	0.25
15	15	1	4	.	.	.	.	3	0	1	8	-2	-2	1	0	.	0	31.4	10	30	0	0.25
15	15	1	4	.	.	.	.	10	0	2	8	-2	-2	1	0	.	0	31.4	10	30	0	0.25
15	15	1	4	.	.	.	.	3	0	1	9	6.2879	538	0	0	.	0	31.4	10	30	0	0.25
15	15	1	4	.	.	.	.	10	0	2	9	5.046	155.4	0	0	.	0	31.4	10	30	0	0.25
15	15	1	4	.	.	.	.	3	0	1	10	-2	-2	1	0	.	0	31.4	10	30	0	0.25
15	15	1	4	.	.	.	.	10	0	2	10	-2	-2	1	0	.	0	31.4	10	30	0	0.25
15	15	1	4	.	.	.	.	3	0	1	11	-2	-2	1	0	.	0	31.4	10	30	0	0.25
15	15	1	4	.	.	.	.	10	0	2	11	-2	-2	1	0	.	0	31.4	10	30	0	0.25
15	15	1	4	.	.	.	.	3	0	1	12	6.1738	480	0	0	.	0	31.4	10	30	0	0.25
15	15	1	4	.	.	.	.	10	0	2	12	4.9053	135	0	0	.	0	31.4	10	30	0	0.25
15	15	1	4	.	.	.	.	3	0	1	13	-2	-2	1	0	.	0	31.4	10	30	0	0.25
15	15	1	4	.	.	.	.	10	0	2	13	-2	-2	1	0	.	0	31.4	10	30	0	0.25
15	15	1	4	.	.	.	.	3	0	1	14	-2	-2	1	0	.	0	31.4	10	30	0	0.25
15	15	1	4	.	.	.	.	10	0	2	14	-2	-2	1	0	.	0	31.4	10	30	0	0.25
15	15	1	4	.	.	.	.	3	0	1	15	6.0684	432	0	0	.	0	31.4	10	30	0	0.25
15	15	1	4	.	.	.	.	10	0	2	15	4.7808	119.2	0	0	.	0	31.4	10	30	0	0.25
15	15	1	4	.	.	.	.	3	0	1	16	-2	-2	1	0	.	0	31.4	10	30	0	0.25
15	15	1	4	.	.	.	.	10	0	2	16	-2	-2	1	0	.	0	31.4	10	30	0	0.25
15	15	1	4	.	.	.	.	3	0	1	17	-2	-2	1	0	.	0	31.4	10	30	0	0.25
15	15	1	4	.	.	.	.	10	0	2	17	-2	-2	1	0	.	0	31.4	10	30	0	0.25
15	15	1	4	.	.	.	.	3	0	1	18	5.2983	200	0	0	.	0	31.4	10	30	0	0.25
15	15	1	4	.	.	.	.	10	0	2	18	4.6644	106.1	0	0	.	0	31.4	10	30	0	0.25
15	15	1	4	.	.	.	.	3	0	1	19	-2	-2	1	0	.	0	31.4	10	30	0	0.25
15	15	1	4	.	.	.	.	10	0	2	19	-2	-2	1	0	.	0	31.4	10	30	0	0.25
15	15	1	4	.	.	.	.	3	0	1	20	-2	-2	1	0	.	0	31.4	10	30	0	0.25
15	15	1	4	.	.	.	.	10	0	2	20	-2	-2	1	0	.	0	31.4	10	30	0	0.25
15	15	1	4	.	.	.	.	3	0	1	21	5.0499	156	0	0	.	0	31.4	10	30	0	0.25
15	15	1	4	.	.	.	.	10	0	2	21	4.0993	60.3	0	0	.	0	31.4	10	30	0	0.25
15	15	1	4	.	.	.	.	3	0	1	22	-2	-2	1	0	.	0	31.4	10	30	0	0.25
15	15	1	4	.	.	.	.	10	0	2	22	-2	-2	1	0	.	0	31.4	10	30	0	0.25
15	15	1	4	.	.	.	.	3	0	1	23	-2	-2	1	0	.	0	31.4	10	30	0	0.25
15	15	1	4	.	.	.	.	10	0	2	23	-2	-2	1	0	.	0	31.4	10	30	0	0.25
15	15	1	4	753.6	753600	125.6	125600	1	1	0	24	-1	-1	1	0	.	0	31.4	10	30	0	0.25
15	15	1	4	753.6	753600	125.6	125600	2	1	0	24	-1	-1	1	0	.	0	31.4	10	30	0	0.25
15	15	1	4	.	.	.	.	3	0	1	24	5.037	154	0	0	.	0	31.4	10	30	0	0.25
15	15	1	4	.	.	.	.	10	0	2	24	4.4659	87	0	0	.	0	31.4	10	30	0	0.25
15	15	1	4	.	.	.	.	3	0	1	25	6.1612	474	0	0	.	0	31.4	10	30	0	0.25
15	15	1	4	.	.	.	.	10	0	2	25	4.8007	121.6	0	0	.	0	31.4	10	30	0	0.25
15	15	1	4	.	.	.	.	3	0	1	26	6.7238	832	0	0	.	0	31.4	10	30	0	0.25
15	15	1	4	.	.	.	.	10	0	2	26	6.6391	764.4	0	0	.	0	31.4	10	30	0	0.25
15	15	1	4	.	.	.	.	3	0	1	27	6.1821	484	0	0	.	0	31.4	10	30	0	0.25
15	15	1	4	.	.	.	.	10	0	2	27	6.2228	504.1	0	0	.	0	31.4	10	30	0	0.25
15	15	1	4	.	.	.	.	3	0	1	28	5.8693	354	0	0	.	0	31.4	10	30	0	0.25
15	15	1	4	.	.	.	.	10	0	2	28	6.1572	472.1	0	0	.	0	31.4	10	30	0	0.25
15	15	1	4	.	.	.	.	3	0	1	29	5.7236	306	0	0	.	0	31.4	10	30	0	0.25
15	15	1	4	.	.	.	.	10	0	2	29	6.3342	563.5	0	0	.	0	31.4	10	30	0	0.25
15	15	1	4	.	.	.	.	3	0	1	30	5.8051	332	0	0	.	0	31.4	10	30	0	0.25
15	15	1	4	.	.	.	.	10	0	2	30	6.7529	856.5	0	0	.	0	31.4	10	30	0	0.25
16	16	1	0	162	162000	6.75	6750	1	1	0	0	-1	-1	1	0	.	0	27	10	30	0	0.25
16	16	1	0	162	162000	6.75	6750	2	1	0	0	-1	-1	1	0	.	0	27	10	30	0	0.25
16	16	1	0	.	.	.	.	3	0	1	0	6.0638	430	0	0	.	0	27	10	30	0	0.25
16	16	1	0	.	.	.	.	10	0	2	0	4.5229	92.1	0	0	.	0	27	10	30	0	0.25
16	16	1	0	.	.	.	.	3	0	1	1	10.5401	37800	0	0	.	0	27	10	30	0	0.25
16	16	1	0	.	.	.	.	10	0	2	1	5.9073	367.7	0	0	.	0	27	10	30	0	0.25
16	16	1	0	.	.	.	.	3	0	1	2	9.8904	19740	0	0	.	0	27	10	30	0	0.25
16	16	1	0	.	.	.	.	10	0	2	2	7.5963	1990.8	0	0	.	0	27	10	30	0	0.25
16	16	1	0	.	.	.	.	3	0	1	3	8.4251	4560	0	0	.	0	27	10	30	0	0.25
16	16	1	0	.	.	.	.	10	0	2	3	6.9818	1076.9	0	0	.	0	27	10	30	0	0.25
16	16	1	0	.	.	.	.	3	0	1	4	7.7698	2368	0	0	.	0	27	10	30	0	0.25
16	16	1	0	.	.	.	.	10	0	2	4	6.3356	564.3	0	0	.	0	27	10	30	0	0.25
16	16	1	0	.	.	.	.	3	0	1	5	7.816	2480	0	0	.	0	27	10	30	0	0.25
16	16	1	0	.	.	.	.	10	0	2	5	6.1589	472.9	0	0	.	0	27	10	30	0	0.25
16	16	1	0	.	.	.	.	3	0	1	6	7.0665	1172	0	0	.	0	27	10	30	0	0.25
16	16	1	0	.	.	.	.	10	0	2	6	6.6957	808.9	0	0	.	0	27	10	30	0	0.25
16	16	1	0	.	.	.	.	3	0	1	7	-2	-2	1	0	.	0	27	10	30	0	0.25
16	16	1	0	.	.	.	.	10	0	2	7	-2	-2	1	0	.	0	27	10	30	0	0.25
16	16	1	0	.	.	.	.	3	0	1	8	-2	-2	1	0	.	0	27	10	30	0	0.25
16	16	1	0	.	.	.	.	10	0	2	8	-2	-2	1	0	.	0	27	10	30	0	0.25
16	16	1	0	.	.	.	.	3	0	1	9	6.7262	834	0	0	.	0	27	10	30	0	0.25
16	16	1	0	.	.	.	.	10	0	2	9	5.7239	306.1	0	0	.	0	27	10	30	0	0.25
16	16	1	0	.	.	.	.	3	0	1	10	-2	-2	1	0	.	0	27	10	30	0	0.25
16	16	1	0	.	.	.	.	10	0	2	10	-2	-2	1	0	.	0	27	10	30	0	0.25
16	16	1	0	.	.	.	.	3	0	1	11	-2	-2	1	0	.	0	27	10	30	0	0.25
16	16	1	0	.	.	.	.	10	0	2	11	-2	-2	1	0	.	0	27	10	30	0	0.25
16	16	1	0	.	.	.	.	3	0	1	12	6.4831	654	0	0	.	0	27	10	30	0	0.25
16	16	1	0	.	.	.	.	10	0	2	12	5.2842	197.2	0	0	.	0	27	10	30	0	0.25
16	16	1	0	.	.	.	.	3	0	1	13	-2	-2	1	0	.	0	27	10	30	0	0.25
16	16	1	0	.	.	.	.	10	0	2	13	-2	-2	1	0	.	0	27	10	30	0	0.25
16	16	1	0	.	.	.	.	3	0	1	14	-2	-2	1	0	.	0	27	10	30	0	0.25
16	16	1	0	.	.	.	.	10	0	2	14	-2	-2	1	0	.	0	27	10	30	0	0.25
16	16	1	0	.	.	.	.	3	0	1	15	6.1985	492	0	0	.	0	27	10	30	0	0.25
16	16	1	0	.	.	.	.	10	0	2	15	4.9712	144.2	0	0	.	0	27	10	30	0	0.25
16	16	1	0	.	.	.	.	3	0	1	16	-2	-2	1	0	.	0	27	10	30	0	0.25
16	16	1	0	.	.	.	.	10	0	2	16	-2	-2	1	0	.	0	27	10	30	0	0.25
16	16	1	0	.	.	.	.	3	0	1	17	-2	-2	1	0	.	0	27	10	30	0	0.25
16	16	1	0	.	.	.	.	10	0	2	17	-2	-2	1	0	.	0	27	10	30	0	0.25
16	16	1	0	.	.	.	.	3	0	1	18	6.2989	544	0	0	.	0	27	10	30	0	0.25
16	16	1	0	.	.	.	.	10	0	2	18	5.0126	150.3	0	0	.	0	27	10	30	0	0.25
16	16	1	0	.	.	.	.	3	0	1	19	-2	-2	1	0	.	0	27	10	30	0	0.25
16	16	1	0	.	.	.	.	10	0	2	19	-2	-2	1	0	.	0	27	10	30	0	0.25
16	16	1	0	.	.	.	.	3	0	1	20	-2	-2	1	0	.	0	27	10	30	0	0.25
16	16	1	0	.	.	.	.	10	0	2	20	-2	-2	1	0	.	0	27	10	30	0	0.25
16	16	1	0	.	.	.	.	3	0	1	21	5.6904	296	0	0	.	0	27	10	30	0	0.25
16	16	1	0	.	.	.	.	10	0	2	21	4.7791	119	0	0	.	0	27	10	30	0	0.25
16	16	1	0	.	.	.	.	3	0	1	22	-2	-2	1	0	.	0	27	10	30	0	0.25
16	16	1	0	.	.	.	.	10	0	2	22	-2	-2	1	0	.	0	27	10	30	0	0.25
16	16	1	0	.	.	.	.	3	0	1	23	-2	-2	1	0	.	0	27	10	30	0	0.25
16	16	1	0	.	.	.	.	10	0	2	23	-2	-2	1	0	.	0	27	10	30	0	0.25
16	16	1	0	40.5	40500	6.75	6750	1	1	0	24	-1	-1	1	0	.	0	27	10	30	0	0.25
16	16	1	0	40.5	40500	6.75	6750	2	1	0	24	-1	-1	1	0	.	0	27	10	30	0	0.25
16	16	1	0	.	.	.	.	3	0	1	24	5.5984	270	0	0	.	0	27	10	30	0	0.25
16	16	1	0	.	.	.	.	10	0	2	24	5.2247	185.8	0	0	.	0	27	10	30	0	0.25
16	16	1	0	.	.	.	.	3	0	1	25	5.3566	212	0	0	.	0	27	10	30	0	0.25
16	16	1	0	.	.	.	.	10	0	2	25	5.2396	188.6	0	0	.	0	27	10	30	0	0.25
16	16	1	0	.	.	.	.	3	0	1	26	5.2679	194	0	0	.	0	27	10	30	0	0.25
16	16	1	0	.	.	.	.	10	0	2	26	5.1428	171.2	0	0	.	0	27	10	30	0	0.25
16	16	1	0	.	.	.	.	3	0	1	27	5.3845	218	0	0	.	0	27	10	30	0	0.25
16	16	1	0	.	.	.	.	10	0	2	27	5.5699	262.4	0	0	.	0	27	10	30	0	0.25
16	16	1	0	.	.	.	.	3	0	1	28	5.3566	212	0	0	.	0	27	10	30	0	0.25
16	16	1	0	.	.	.	.	10	0	2	28	5.8805	358	0	0	.	0	27	10	30	0	0.25
16	16	1	0	.	.	.	.	3	0	1	29	5.3471	210	0	0	.	0	27	10	30	0	0.25
16	16	1	0	.	.	.	.	10	0	2	29	5.5895	267.6	0	0	.	0	27	10	30	0	0.25
16	16	1	0	.	.	.	.	3	0	1	30	5.663	288	0	0	.	0	27	10	30	0	0.25
16	16	1	0	.	.	.	.	10	0	2	30	5.7157	303.6	0	0	.	0	27	10	30	0	0.25
17	17	1	0	166.2	166200	6.925	6925	1	1	0	0	-1	-1	1	0	.	0	27.7	10	30	0	0.25
17	17	1	0	166.2	166200	6.925	6925	2	1	0	0	-1	-1	1	0	.	0	27.7	10	30	0	0.25
17	17	1	0	.	.	.	.	3	0	1	0	5.6904	296	0	0	.	0	27.7	10	30	0	0.25
17	17	1	0	.	.	.	.	10	0	2	0	4.4344	84.3	0	0	.	0	27.7	10	30	0	0.25
17	17	1	0	.	.	.	.	3	0	1	1	7.1854	1320	0	0	.	0	27.7	10	30	0	0.25
17	17	1	0	.	.	.	.	10	0	2	1	5.2396	188.6	0	0	.	0	27.7	10	30	0	0.25
17	17	1	0	.	.	.	.	3	0	1	2	7.5929	1984	0	0	.	0	27.7	10	30	0	0.25
17	17	1	0	.	.	.	.	10	0	2	2	5.3575	212.2	0	0	.	0	27.7	10	30	0	0.25
17	17	1	0	.	.	.	.	3	0	1	3	7.6128	2024	0	0	.	0	27.7	10	30	0	0.25
17	17	1	0	.	.	.	.	10	0	2	3	5.9723	392.4	0	0	.	0	27.7	10	30	0	0.25
17	17	1	0	.	.	.	.	3	0	1	4	7.2034	1344	0	0	.	0	27.7	10	30	0	0.25
17	17	1	0	.	.	.	.	10	0	2	4	6.1238	456.6	0	0	.	0	27.7	10	30	0	0.25
17	17	1	0	.	.	.	.	3	0	1	5	7.2182	1364	0	0	.	0	27.7	10	30	0	0.25
17	17	1	0	.	.	.	.	10	0	2	5	6.1238	456.6	0	0	.	0	27.7	10	30	0	0.25
17	17	1	0	.	.	.	.	3	0	1	6	7.0665	1172	0	0	.	0	27.7	10	30	0	0.25
17	17	1	0	.	.	.	.	10	0	2	6	5.9013	365.5	0	0	.	0	27.7	10	30	0	0.25
17	17	1	0	.	.	.	.	3	0	1	7	-2	-2	1	0	.	0	27.7	10	30	0	0.25
17	17	1	0	.	.	.	.	10	0	2	7	-2	-2	1	0	.	0	27.7	10	30	0	0.25
17	17	1	0	.	.	.	.	3	0	1	8	-2	-2	1	0	.	0	27.7	10	30	0	0.25
17	17	1	0	.	.	.	.	10	0	2	8	-2	-2	1	0	.	0	27.7	10	30	0	0.25
17	17	1	0	.	.	.	.	3	0	1	9	6.7476	852	0	0	.	0	27.7	10	30	0	0.25
17	17	1	0	.	.	.	.	10	0	2	9	5.6685	289.6	0	0	.	0	27.7	10	30	0	0.25
17	17	1	0	.	.	.	.	3	0	1	10	-2	-2	1	0	.	0	27.7	10	30	0	0.25
17	17	1	0	.	.	.	.	10	0	2	10	-2	-2	1	0	.	0	27.7	10	30	0	0.25
17	17	1	0	.	.	.	.	3	0	1	11	-2	-2	1	0	.	0	27.7	10	30	0	0.25
17	17	1	0	.	.	.	.	10	0	2	11	-2	-2	1	0	.	0	27.7	10	30	0	0.25
17	17	1	0	.	.	.	.	3	0	1	12	6.1485	468	0	0	.	0	27.7	10	30	0	0.25
17	17	1	0	.	.	.	.	10	0	2	12	4.7673	117.6	0	0	.	0	27.7	10	30	0	0.25
17	17	1	0	.	.	.	.	3	0	1	13	-2	-2	1	0	.	0	27.7	10	30	0	0.25
17	17	1	0	.	.	.	.	10	0	2	13	-2	-2	1	0	.	0	27.7	10	30	0	0.25
17	17	1	0	.	.	.	.	3	0	1	14	-2	-2	1	0	.	0	27.7	10	30	0	0.25
17	17	1	0	.	.	.	.	10	0	2	14	-2	-2	1	0	.	0	27.7	10	30	0	0.25
17	17	1	0	.	.	.	.	3	0	1	15	6.3279	560	0	0	.	0	27.7	10	30	0	0.25
17	17	1	0	.	.	.	.	10	0	2	15	5.2062	182.4	0	0	.	0	27.7	10	30	0	0.25
17	17	1	0	.	.	.	.	3	0	1	16	-2	-2	1	0	.	0	27.7	10	30	0	0.25
17	17	1	0	.	.	.	.	10	0	2	16	-2	-2	1	0	.	0	27.7	10	30	0	0.25
17	17	1	0	.	.	.	.	3	0	1	17	-2	-2	1	0	.	0	27.7	10	30	0	0.25
17	17	1	0	.	.	.	.	10	0	2	17	-2	-2	1	0	.	0	27.7	10	30	0	0.25
17	17	1	0	.	.	.	.	3	0	1	18	6.1048	448	0	0	.	0	27.7	10	30	0	0.25
17	17	1	0	.	.	.	.	10	0	2	18	4.7673	117.6	0	0	.	0	27.7	10	30	0	0.25
17	17	1	0	.	.	.	.	3	0	1	19	-2	-2	1	0	.	0	27.7	10	30	0	0.25
17	17	1	0	.	.	.	.	10	0	2	19	-2	-2	1	0	.	0	27.7	10	30	0	0.25
17	17	1	0	.	.	.	.	3	0	1	20	-2	-2	1	0	.	0	27.7	10	30	0	0.25
17	17	1	0	.	.	.	.	10	0	2	20	-2	-2	1	0	.	0	27.7	10	30	0	0.25
17	17	1	0	.	.	.	.	3	0	1	21	6.612	744	0	0	.	0	27.7	10	30	0	0.25
17	17	1	0	.	.	.	.	10	0	2	21	7.0742	1181.1	0	1	.	0	27.7	10	30	0	0.25
17	17	1	0	.	.	.	.	3	0	1	22	-2	-2	1	0	.	0	27.7	10	30	0	0.25
17	17	1	0	.	.	.	.	10	0	2	22	-2	-2	1	0	.	0	27.7	10	30	0	0.25
17	17	1	0	.	.	.	.	3	0	1	23	-2	-2	1	0	.	0	27.7	10	30	0	0.25
17	17	1	0	.	.	.	.	10	0	2	23	-2	-2	1	0	.	0	27.7	10	30	0	0.25
17	17	1	0	41.55	41550	6.925	6925	1	1	0	24	-1	-1	1	0	.	0	27.7	10	30	0	0.25
17	17	1	0	41.55	41550	6.925	6925	2	1	0	24	-1	-1	1	0	.	0	27.7	10	30	0	0.25
17	17	1	0	.	.	.	.	3	0	1	24	6.1654	476	0	0	.	0	27.7	10	30	0	0.25
17	17	1	0	.	.	.	.	10	0	2	24	4.9134	136.1	0	0	.	0	27.7	10	30	0	0.25
17	17	1	0	.	.	.	.	3	0	1	25	6.021	412	0	0	.	0	27.7	10	30	0	0.25
17	17	1	0	.	.	.	.	10	0	2	25	5.1533	173	0	0	.	0	27.7	10	30	0	0.25
17	17	1	0	.	.	.	.	3	0	1	26	5.7301	308	0	0	.	0	27.7	10	30	0	0.25
17	17	1	0	.	.	.	.	10	0	2	26	5.3845	218	0	0	.	0	27.7	10	30	0	0.25
17	17	1	0	.	.	.	.	3	0	1	27	5.7746	322	0	0	.	0	27.7	10	30	0	0.25
17	17	1	0	.	.	.	.	10	0	2	27	5.4223	226.4	0	0	.	0	27.7	10	30	0	0.25
17	17	1	0	.	.	.	.	3	0	1	28	5.6131	274	0	0	.	0	27.7	10	30	0	0.25
17	17	1	0	.	.	.	.	10	0	2	28	5.5763	264.1	0	0	.	0	27.7	10	30	0	0.25
17	17	1	0	.	.	.	.	3	0	1	29	5.366	214	0	0	.	0	27.7	10	30	0	0.25
17	17	1	0	.	.	.	.	10	0	2	29	5.624	277	0	0	.	0	27.7	10	30	0	0.25
17	17	1	0	.	.	.	.	3	0	1	30	5.4972	244	0	0	.	0	27.7	10	30	0	0.25
17	17	1	0	.	.	.	.	10	0	2	30	5.6423	282.1	0	0	.	0	27.7	10	30	0	0.25
18	18	1	0	162	162000	6.75	6750	1	1	0	0	-1	-1	1	0	.	0	27	10	30	0	0.25
18	18	1	0	162	162000	6.75	6750	2	1	0	0	-1	-1	1	0	.	0	27	10	30	0	0.25
18	18	1	0	.	.	.	.	3	0	1	0	6.3596	578	0	0	.	0	27	10	30	0	0.25
18	18	1	0	.	.	.	.	10	0	2	0	6.3126	551.5	0	0	.	0	27	10	30	0	0.25
18	18	1	0	.	.	.	.	3	0	1	1	8.2945	4002	0	0	.	0	27	10	30	0	0.25
18	18	1	0	.	.	.	.	10	0	2	1	6.2534	519.8	0	0	.	0	27	10	30	0	0.25
18	18	1	0	.	.	.	.	3	0	1	2	8.2252	3734	0	0	.	0	27	10	30	0	0.25
18	18	1	0	.	.	.	.	10	0	2	2	6.28	533.8	0	0	.	0	27	10	30	0	0.25
18	18	1	0	.	.	.	.	3	0	1	3	7.4313	1688	0	0	.	0	27	10	30	0	0.25
18	18	1	0	.	.	.	.	10	0	2	3	5.3973	220.8	0	0	.	0	27	10	30	0	0.25
18	18	1	0	.	.	.	.	3	0	1	4	5.4205	226	0	1	.	0	27	10	30	0	0.25
18	18	1	0	.	.	.	.	10	0	2	4	6.846	940.1	0	0	.	0	27	10	30	0	0.25
18	18	1	0	.	.	.	.	3	0	1	5	7.1293	1248	0	0	.	0	27	10	30	0	0.25
18	18	1	0	.	.	.	.	10	0	2	5	6.3938	598.1	0	0	.	0	27	10	30	0	0.25
18	18	1	0	.	.	.	.	3	0	1	6	6.9117	1004	0	0	.	0	27	10	30	0	0.25
18	18	1	0	.	.	.	.	10	0	2	6	6.1284	458.7	0	0	.	0	27	10	30	0	0.25
18	18	1	0	.	.	.	.	3	0	1	7	-2	-2	1	0	.	0	27	10	30	0	0.25
18	18	1	0	.	.	.	.	10	0	2	7	-2	-2	1	0	.	0	27	10	30	0	0.25
18	18	1	0	.	.	.	.	3	0	1	8	-2	-2	1	0	.	0	27	10	30	0	0.25
18	18	1	0	.	.	.	.	10	0	2	8	-2	-2	1	0	.	0	27	10	30	0	0.25
18	18	1	0	.	.	.	.	3	0	1	9	6.5453	696	0	0	.	0	27	10	30	0	0.25
18	18	1	0	.	.	.	.	10	0	2	9	5.7497	314.1	0	0	.	0	27	10	30	0	0.25
18	18	1	0	.	.	.	.	3	0	1	10	-2	-2	1	0	.	0	27	10	30	0	0.25
18	18	1	0	.	.	.	.	10	0	2	10	-2	-2	1	0	.	0	27	10	30	0	0.25
18	18	1	0	.	.	.	.	3	0	1	11	-2	-2	1	0	.	0	27	10	30	0	0.25
18	18	1	0	.	.	.	.	10	0	2	11	-2	-2	1	0	.	0	27	10	30	0	0.25
18	18	1	0	.	.	.	.	3	0	1	12	6.3869	594	0	0	.	0	27	10	30	0	0.25
18	18	1	0	.	.	.	.	10	0	2	12	5.9664	390.1	0	0	.	0	27	10	30	0	0.25
18	18	1	0	.	.	.	.	3	0	1	13	-2	-2	1	0	.	0	27	10	30	0	0.25
18	18	1	0	.	.	.	.	10	0	2	13	-2	-2	1	0	.	0	27	10	30	0	0.25
18	18	1	0	.	.	.	.	3	0	1	14	-2	-2	1	0	.	0	27	10	30	0	0.25
18	18	1	0	.	.	.	.	10	0	2	14	-2	-2	1	0	.	0	27	10	30	0	0.25
18	18	1	0	.	.	.	.	3	0	1	15	6.2538	520	0	0	.	0	27	10	30	0	0.25
18	18	1	0	.	.	.	.	10	0	2	15	5.8889	361	0	0	.	0	27	10	30	0	0.25
18	18	1	0	.	.	.	.	3	0	1	16	-2	-2	1	0	.	0	27	10	30	0	0.25
18	18	1	0	.	.	.	.	10	0	2	16	-2	-2	1	0	.	0	27	10	30	0	0.25
18	18	1	0	.	.	.	.	3	0	1	17	-2	-2	1	0	.	0	27	10	30	0	0.25
18	18	1	0	.	.	.	.	10	0	2	17	-2	-2	1	0	.	0	27	10	30	0	0.25
18	18	1	0	.	.	.	.	3	0	1	18	6.1612	474	0	0	.	0	27	10	30	0	0.25
18	18	1	0	.	.	.	.	10	0	2	18	5.8565	349.5	0	0	.	0	27	10	30	0	0.25
18	18	1	0	.	.	.	.	3	0	1	19	-2	-2	1	0	.	0	27	10	30	0	0.25
18	18	1	0	.	.	.	.	10	0	2	19	-2	-2	1	0	.	0	27	10	30	0	0.25
18	18	1	0	.	.	.	.	3	0	1	20	-2	-2	1	0	.	0	27	10	30	0	0.25
18	18	1	0	.	.	.	.	10	0	2	20	-2	-2	1	0	.	0	27	10	30	0	0.25
18	18	1	0	.	.	.	.	3	0	1	21	5.9402	380	0	0	.	0	27	10	30	0	0.25
18	18	1	0	.	.	.	.	10	0	2	21	5.6598	287.1	0	0	.	0	27	10	30	0	0.25
18	18	1	0	.	.	.	.	3	0	1	22	-2	-2	1	0	.	0	27	10	30	0	0.25
18	18	1	0	.	.	.	.	10	0	2	22	-2	-2	1	0	.	0	27	10	30	0	0.25
18	18	1	0	.	.	.	.	3	0	1	23	-2	-2	1	0	.	0	27	10	30	0	0.25
18	18	1	0	.	.	.	.	10	0	2	23	-2	-2	1	0	.	0	27	10	30	0	0.25
18	18	1	0	40.5	40500	6.75	6750	1	1	0	24	-1	-1	1	0	.	0	27	10	30	0	0.25
18	18	1	0	40.5	40500	6.75	6750	2	1	0	24	-1	-1	1	0	.	0	27	10	30	0	0.25
18	18	1	0	.	.	.	.	3	0	1	24	5.717	304	0	0	.	0	27	10	30	0	0.25
18	18	1	0	.	.	.	.	10	0	2	24	5.2554	191.6	0	0	.	0	27	10	30	0	0.25
18	18	1	0	.	.	.	.	3	0	1	25	5.7494	314	0	0	.	0	27	10	30	0	0.25
18	18	1	0	.	.	.	.	10	0	2	25	4.9134	136.1	0	0	.	0	27	10	30	0	0.25
18	18	1	0	.	.	.	.	3	0	1	26	5.8289	340	0	0	.	0	27	10	30	0	0.25
18	18	1	0	.	.	.	.	10	0	2	26	5.1716	176.2	0	0	.	0	27	10	30	0	0.25
18	18	1	0	.	.	.	.	3	0	1	27	5.6768	292	0	0	.	0	27	10	30	0	0.25
18	18	1	0	.	.	.	.	10	0	2	27	5.0113	150.1	0	0	.	0	27	10	30	0	0.25
18	18	1	0	.	.	.	.	3	0	1	28	5.5683	262	0	0	.	0	27	10	30	0	0.25
18	18	1	0	.	.	.	.	10	0	2	28	5.2862	197.6	0	0	.	0	27	10	30	0	0.25
18	18	1	0	.	.	.	.	3	0	1	29	5.4723	238	0	0	.	0	27	10	30	0	0.25
18	18	1	0	.	.	.	.	10	0	2	29	5.4346	229.2	0	0	.	0	27	10	30	0	0.25
18	18	1	0	.	.	.	.	3	0	1	30	5.4027	222	0	0	.	0	27	10	30	0	0.25
18	18	1	0	.	.	.	.	10	0	2	30	5.4467	232	0	0	.	0	27	10	30	0	0.25
19	19	1	1	166.2	166200	27.7	27700	1	1	0	24	-1	-1	1	0	.	0	27.7	10	6	0	0
19	19	1	1	166.2	166200	27.7	27700	2	1	0	24	-1	-1	1	0	.	0	27.7	10	6	0	0
19	19	1	1	.	.	.	.	3	0	1	24	5.5835	266	0	0	.	0	27.7	10	6	0	0
19	19	1	1	.	.	.	.	10	0	2	24	2.7973	16.4	0	0	.	0	27.7	10	6	0	0
19	19	1	1	.	.	.	.	3	0	1	25	11.8729	143330	0	0	.	0	27.7	10	6	0	0
19	19	1	1	.	.	.	.	10	0	2	25	5.1222	167.7	0	0	.	0	27.7	10	6	0	0
19	19	1	1	.	.	.	.	3	0	1	26	12.081	176480	0	0	.	0	27.7	10	6	0	0
19	19	1	1	.	.	.	.	10	0	2	26	7.5522	1905	0	0	.	0	27.7	10	6	0	0
19	19	1	1	.	.	.	.	3	0	1	27	10.3222	30400	0	0	.	0	27.7	10	6	0	0
19	19	1	1	.	.	.	.	10	0	2	27	8.3788	4353.9	0	0	.	0	27.7	10	6	0	0
19	19	1	1	.	.	.	.	3	0	1	28	9.1519	9432	0	0	.	0	27.7	10	6	0	0
19	19	1	1	.	.	.	.	10	0	2	28	8.4755	4796	0	0	.	0	27.7	10	6	0	0
19	19	1	1	.	.	.	.	3	0	1	29	8.3907	4406	0	0	.	0	27.7	10	6	0	0
19	19	1	1	.	.	.	.	10	0	2	29	8.3386	4182.1	0	0	.	0	27.7	10	6	0	0
19	19	1	1	.	.	.	.	3	0	1	30	10.5937	39882	0	1	.	0	27.7	10	6	0	0
19	19	1	1	.	.	.	.	10	0	2	30	8.3226	4115.9	0	0	.	0	27.7	10	6	0	0
20	20	1	1	167.4	167400	27.9	27900	1	1	0	24	-1	-1	1	0	.	0	27.9	10	6	0	0
20	20	1	1	167.4	167400	27.9	27900	2	1	0	24	-1	-1	1	0	.	0	27.9	10	6	0	0
20	20	1	1	.	.	.	.	3	0	1	24	6.3561	576	0	0	.	0	27.9	10	6	0	0
20	20	1	1	.	.	.	.	10	0	2	24	4.8057	122.2	0	0	.	0	27.9	10	6	0	0
20	20	1	1	.	.	.	.	3	0	1	25	10.0105	22260	0	0	.	0	27.9	10	6	0	0
20	20	1	1	.	.	.	.	10	0	2	25	7.242	1396.9	0	0	.	0	27.9	10	6	0	0
20	20	1	1	.	.	.	.	3	0	1	26	9.2496	10400	0	0	.	0	27.9	10	6	0	0
20	20	1	1	.	.	.	.	10	0	2	26	8.033	3081	0	0	.	0	27.9	10	6	0	0
20	20	1	1	.	.	.	.	3	0	1	27	8.6269	5580	0	0	.	0	27.9	10	6	0	0
20	20	1	1	.	.	.	.	10	0	2	27	7.8003	2441.4	0	0	.	0	27.9	10	6	0	0
20	20	1	1	.	.	.	.	3	0	1	28	8.1179	3354	0	0	.	0	27.9	10	6	0	0
20	20	1	1	.	.	.	.	10	0	2	28	7.4929	1795.2	0	0	.	0	27.9	10	6	0	0
20	20	1	1	.	.	.	.	3	0	1	29	7.6953	2198	0	0	.	0	27.9	10	6	0	0
20	20	1	1	.	.	.	.	10	0	2	29	7	1096.6	0	0	.	0	27.9	10	6	0	0
20	20	1	1	.	.	.	.	3	0	1	30	7.5326	1868	0	0	.	0	27.9	10	6	0	0
20	20	1	1	.	.	.	.	10	0	2	30	6.8713	964.2	0	0	.	0	27.9	10	6	0	0
21	21	1	4	715.2	715200	119.2	119200	1	1	0	24	-1	-1	1	0	.	0	29.8	10	6	0	0
21	21	1	4	715.2	715200	119.2	119200	2	1	0	24	-1	-1	1	0	.	0	29.8	10	6	0	0
21	21	1	4	.	.	.	.	3	0	1	24	5.366	214	0	0	.	0	29.8	10	6	0	0
21	21	1	4	.	.	.	.	10	0	2	24	3.0397	20.9	0	0	.	0	29.8	10	6	0	0
21	21	1	4	.	.	.	.	3	0	1	25	11.7096	121738	0	0	.	0	29.8	10	6	0	0
21	21	1	4	.	.	.	.	10	0	2	25	7.6334	2066.1	0	0	.	0	29.8	10	6	0	0
21	21	1	4	.	.	.	.	3	0	1	26	10.4516	34600	0	0	.	0	29.8	10	6	0	0
21	21	1	4	.	.	.	.	10	0	2	26	8.1437	3441.5	0	0	.	0	29.8	10	6	0	0
21	21	1	4	.	.	.	.	3	0	1	27	8.1059	3314	0	0	.	0	29.8	10	6	0	0
21	21	1	4	.	.	.	.	10	0	2	27	7.7856	2405.6	0	0	.	0	29.8	10	6	0	0
21	21	1	4	.	.	.	.	3	0	1	28	7.3563	1566	0	0	.	0	29.8	10	6	0	0
21	21	1	4	.	.	.	.	10	0	2	28	7.4346	1693.5	0	0	.	0	29.8	10	6	0	0
21	21	1	4	.	.	.	.	3	0	1	29	7.2211	1368	0	0	.	0	29.8	10	6	0	0
21	21	1	4	.	.	.	.	10	0	2	29	7.0016	1098.4	0	0	.	0	29.8	10	6	0	0
21	21	1	4	.	.	.	.	3	0	1	30	7.0335	1134	0	0	.	0	29.8	10	6	0	0
21	21	1	4	.	.	.	.	10	0	2	30	6.7316	838.5	0	0	.	0	29.8	10	6	0	0
22	22	1	4	669.6	669600	111.6	111600	1	1	0	24	-1	-1	1	0	.	0	27.9	10	6	0	0
22	22	1	4	669.6	669600	111.6	111600	2	1	0	24	-1	-1	1	0	.	0	27.9	10	6	0	0
22	22	1	4	.	.	.	.	3	0	1	24	5.663	288	0	0	.	0	27.9	10	6	0	0
22	22	1	4	.	.	.	.	10	0	2	24	2.3418	10.4	0	0	.	0	27.9	10	6	0	0
22	22	1	4	.	.	.	.	3	0	1	25	11.1	66172	0	0	.	0	27.9	10	6	0	0
22	22	1	4	.	.	.	.	10	0	2	25	6.1629	474.8	0	0	.	0	27.9	10	6	0	0
22	22	1	4	.	.	.	.	3	0	1	26	10.6561	42450	0	0	.	0	27.9	10	6	0	0
22	22	1	4	.	.	.	.	10	0	2	26	8.1234	3372.5	0	0	.	0	27.9	10	6	0	0
22	22	1	4	.	.	.	.	3	0	1	27	8.7419	6260	0	0	.	0	27.9	10	6	0	0
22	22	1	4	.	.	.	.	10	0	2	27	8.237	3778	0	0	.	0	27.9	10	6	0	0
22	22	1	4	.	.	.	.	3	0	1	28	8.426	4564	0	0	.	0	27.9	10	6	0	0
22	22	1	4	.	.	.	.	10	0	2	28	8.1043	3308.6	0	0	.	0	27.9	10	6	0	0
22	22	1	4	.	.	.	.	3	0	1	29	8.1964	3628	0	0	.	0	27.9	10	6	0	0
22	22	1	4	.	.	.	.	10	0	2	29	7.9169	2743.3	0	0	.	0	27.9	10	6	0	0
22	22	1	4	.	.	.	.	3	0	1	30	8.2449	3808	0	0	.	0	27.9	10	6	0	0
22	22	1	4	.	.	.	.	10	0	2	30	7.8395	2538.9	0	0	.	0	27.9	10	6	0	0
23	23	1	0	1.00E-05	1.00E-05	.	.	1	1	0	0	-1	-1	1	0	.	0	28.1	10	30	0	0
23	23	1	0	1.00E-05	1.00E-05	.	.	2	1	0	0	-1	-1	1	0	.	0	28.1	10	30	0	0
23	23	1	0	.	.	.	.	3	0	1	0	4.7707	118	0	0	.	0	28.1	10	30	0	0
23	23	1	0	.	.	.	.	10	0	2	0	-2	-2	1	0	.	0	28.1	10	30	0	0
23	23	1	0	.	.	.	.	3	0	1	1	5.124	168	0	0	.	0	28.1	10	30	0	0
23	23	1	0	.	.	.	.	10	0	2	1	-2	-2	1	0	.	0	28.1	10	30	0	0
23	23	1	0	.	.	.	.	3	0	1	2	5.193	180	0	0	.	0	28.1	10	30	0	0
23	23	1	0	.	.	.	.	10	0	2	2	-2	-2	1	0	.	0	28.1	10	30	0	0
23	23	1	0	.	.	.	.	3	0	1	3	5.3083	202	0	0	.	0	28.1	10	30	0	0
23	23	1	0	.	.	.	.	10	0	2	3	-2	-2	1	0	.	0	28.1	10	30	0	0
23	23	1	0	.	.	.	.	3	0	1	4	5.4293	228	0	0	.	0	28.1	10	30	0	0
23	23	1	0	.	.	.	.	10	0	2	4	-2	-2	1	0	.	0	28.1	10	30	0	0
23	23	1	0	.	.	.	.	3	0	1	5	5.6699	290	0	0	.	0	28.1	10	30	0	0
23	23	1	0	.	.	.	.	10	0	2	5	-2	-2	1	0	.	0	28.1	10	30	0	0
23	23	1	0	.	.	.	.	3	0	1	6	5.124	168	0	0	.	0	28.1	10	30	0	0
23	23	1	0	.	.	.	.	10	0	2	6	-2	-2	1	0	.	0	28.1	10	30	0	0
23	23	1	0	.	.	.	.	3	0	1	7	-2	-2	1	0	.	0	28.1	10	30	0	0
23	23	1	0	.	.	.	.	10	0	2	7	-2	-2	1	0	.	0	28.1	10	30	0	0
23	23	1	0	.	.	.	.	3	0	1	8	-2	-2	1	0	.	0	28.1	10	30	0	0
23	23	1	0	.	.	.	.	10	0	2	8	-2	-2	1	0	.	0	28.1	10	30	0	0
23	23	1	0	.	.	.	.	3	0	1	9	5.0999	164	0	0	.	0	28.1	10	30	0	0
23	23	1	0	.	.	.	.	10	0	2	9	-2	-2	1	0	.	0	28.1	10	30	0	0
23	23	1	0	.	.	.	.	3	0	1	10	-2	-2	1	0	.	0	28.1	10	30	0	0
23	23	1	0	.	.	.	.	10	0	2	10	-2	-2	1	0	.	0	28.1	10	30	0	0
23	23	1	0	.	.	.	.	3	0	1	11	-2	-2	1	0	.	0	28.1	10	30	0	0
23	23	1	0	.	.	.	.	10	0	2	11	-2	-2	1	0	.	0	28.1	10	30	0	0
23	23	1	0	.	.	.	.	3	0	1	12	5.0752	160	0	0	.	0	28.1	10	30	0	0
23	23	1	0	.	.	.	.	10	0	2	12	-2	-2	1	0	.	0	28.1	10	30	0	0
23	23	1	0	.	.	.	.	3	0	1	13	-2	-2	1	0	.	0	28.1	10	30	0	0
23	23	1	0	.	.	.	.	10	0	2	13	-2	-2	1	0	.	0	28.1	10	30	0	0
23	23	1	0	.	.	.	.	3	0	1	14	-2	-2	1	0	.	0	28.1	10	30	0	0
23	23	1	0	.	.	.	.	10	0	2	14	-2	-2	1	0	.	0	28.1	10	30	0	0
23	23	1	0	.	.	.	.	3	0	1	15	4.9127	136	0	0	.	0	28.1	10	30	0	0
23	23	1	0	.	.	.	.	10	0	2	15	-2	-2	1	0	.	0	28.1	10	30	0	0
23	23	1	0	.	.	.	.	3	0	1	16	-2	-2	1	0	.	0	28.1	10	30	0	0
23	23	1	0	.	.	.	.	10	0	2	16	-2	-2	1	0	.	0	28.1	10	30	0	0
23	23	1	0	.	.	.	.	3	0	1	17	-2	-2	1	0	.	0	28.1	10	30	0	0
23	23	1	0	.	.	.	.	10	0	2	17	-2	-2	1	0	.	0	28.1	10	30	0	0
23	23	1	0	.	.	.	.	3	0	1	18	8.1696	3532	0	1	.	0	28.1	10	30	0	0
23	23	1	0	.	.	.	.	10	0	2	18	-2	-2	1	0	.	0	28.1	10	30	0	0
23	23	1	0	.	.	.	.	3	0	1	19	-2	-2	1	0	.	0	28.1	10	30	0	0
23	23	1	0	.	.	.	.	10	0	2	19	-2	-2	1	0	.	0	28.1	10	30	0	0
23	23	1	0	.	.	.	.	3	0	1	20	-2	-2	1	0	.	0	28.1	10	30	0	0
23	23	1	0	.	.	.	.	10	0	2	20	-2	-2	1	0	.	0	28.1	10	30	0	0
23	23	1	0	.	.	.	.	3	0	1	21	5.0999	164	0	0	.	0	28.1	10	30	0	0
23	23	1	0	.	.	.	.	10	0	2	21	-2	-2	1	0	.	0	28.1	10	30	0	0
23	23	1	0	.	.	.	.	3	0	1	22	-2	-2	1	0	.	0	28.1	10	30	0	0
23	23	1	0	.	.	.	.	10	0	2	22	-2	-2	1	0	.	0	28.1	10	30	0	0
23	23	1	0	.	.	.	.	3	0	1	23	-2	-2	1	0	.	0	28.1	10	30	0	0
23	23	1	0	.	.	.	.	10	0	2	23	-2	-2	1	0	.	0	28.1	10	30	0	0
23	23	1	0	1.00E-05	1.00E-05	.	.	1	1	0	24	-1	-1	1	0	.	0	28.1	10	30	0	0
23	23	1	0	1.00E-05	1.00E-05	.	.	2	1	0	24	-1	-1	1	0	.	0	28.1	10	30	0	0
23	23	1	0	.	.	.	.	3	0	1	24	5.3083	202	0	0	.	0	28.1	10	30	0	0
23	23	1	0	.	.	.	.	10	0	2	24	-2	-2	1	0	.	0	28.1	10	30	0	0
23	23	1	0	.	.	.	.	3	0	1	25	5.4116	224	0	0	.	0	28.1	10	30	0	0
23	23	1	0	.	.	.	.	10	0	2	25	-2	-2	1	0	.	0	28.1	10	30	0	0
23	23	1	0	.	.	.	.	3	0	1	26	5.3936	220	0	0	.	0	28.1	10	30	0	0
23	23	1	0	.	.	.	.	10	0	2	26	-2	-2	1	0	.	0	28.1	10	30	0	0
23	23	1	0	.	.	.	.	3	0	1	27	5.4889	242	0	0	.	0	28.1	10	30	0	0
23	23	1	0	.	.	.	.	10	0	2	27	-2	-2	1	0	.	0	28.1	10	30	0	0
23	23	1	0	.	.	.	.	3	0	1	28	4.9558	142	0	0	.	0	28.1	10	30	0	0
23	23	1	0	.	.	.	.	10	0	2	28	-2	-2	1	0	.	0	28.1	10	30	0	0
23	23	1	0	.	.	.	.	3	0	1	29	5.0106	150	0	0	.	0	28.1	10	30	0	0
23	23	1	0	.	.	.	.	10	0	2	29	-2	-2	1	0	.	0	28.1	10	30	0	0
23	23	1	0	.	.	.	.	3	0	1	30	4.9416	140	0	0	.	0	28.1	10	30	0	0
23	23	1	0	.	.	.	.	10	0	2	30	-2	-2	1	0	.	0	28.1	10	30	0	0
24	24	1	0	1.00E-05	1.00E-05	.	.	1	1	0	0	-1	-1	1	0	.	0	28.6	10	30	0	0
24	24	1	0	1.00E-05	1.00E-05	.	.	2	1	0	0	-1	-1	1	0	.	0	28.6	10	30	0	0
24	24	1	0	.	.	.	.	3	0	1	0	5.4553	234	0	0	.	0	28.6	10	30	0	0
24	24	1	0	.	.	.	.	10	0	2	0	4.866	129.8	0	0	.	0	28.6	10	30	0	0
24	24	1	0	.	.	.	.	3	0	1	1	6.3208	556	0	0	.	0	28.6	10	30	0	0
24	24	1	0	.	.	.	.	10	0	2	1	5.6754	291.6	0	0	.	0	28.6	10	30	0	0
24	24	1	0	.	.	.	.	3	0	1	2	6.1225	456	0	0	.	0	28.6	10	30	0	0
24	24	1	0	.	.	.	.	10	0	2	2	5.3863	218.4	0	0	.	0	28.6	10	30	0	0
24	24	1	0	.	.	.	.	3	0	1	3	5.8693	354	0	0	.	0	28.6	10	30	0	0
24	24	1	0	.	.	.	.	10	0	2	3	5.2852	197.4	0	0	.	0	28.6	10	30	0	0
24	24	1	0	.	.	.	.	3	0	1	4	6.1944	490	0	0	.	0	28.6	10	30	0	0
24	24	1	0	.	.	.	.	10	0	2	4	5.409	223.4	0	0	.	0	28.6	10	30	0	0
24	24	1	0	.	.	.	.	3	0	1	5	6.1862	486	0	0	.	0	28.6	10	30	0	0
24	24	1	0	.	.	.	.	10	0	2	5	5.5653	261.2	0	0	.	0	28.6	10	30	0	0
24	24	1	0	.	.	.	.	3	0	1	6	6.2729	530	0	0	.	0	28.6	10	30	0	0
24	24	1	0	.	.	.	.	10	0	2	6	5.838	343.1	0	0	.	0	28.6	10	30	0	0
24	24	1	0	.	.	.	.	3	0	1	7	-2	-2	1	0	.	0	28.6	10	30	0	0
24	24	1	0	.	.	.	.	10	0	2	7	-2	-2	1	0	.	0	28.6	10	30	0	0
24	24	1	0	.	.	.	.	3	0	1	8	-2	-2	1	0	.	0	28.6	10	30	0	0
24	24	1	0	.	.	.	.	10	0	2	8	-2	-2	1	0	.	0	28.6	10	30	0	0
24	24	1	0	.	.	.	.	3	0	1	9	6.1696	478	0	0	.	0	28.6	10	30	0	0
24	24	1	0	.	.	.	.	10	0	2	9	6.4489	632	0	0	.	0	28.6	10	30	0	0
24	24	1	0	.	.	.	.	3	0	1	10	-2	-2	1	0	.	0	28.6	10	30	0	0
24	24	1	0	.	.	.	.	10	0	2	10	-2	-2	1	0	.	0	28.6	10	30	0	0
24	24	1	0	.	.	.	.	3	0	1	11	-2	-2	1	0	.	0	28.6	10	30	0	0
24	24	1	0	.	.	.	.	10	0	2	11	-2	-2	1	0	.	0	28.6	10	30	0	0
24	24	1	0	.	.	.	.	3	0	1	12	6.1137	452	0	0	.	0	28.6	10	30	0	0
24	24	1	0	.	.	.	.	10	0	2	12	6.2005	493	0	0	.	0	28.6	10	30	0	0
24	24	1	0	.	.	.	.	3	0	1	13	-2	-2	1	0	.	0	28.6	10	30	0	0
24	24	1	0	.	.	.	.	10	0	2	13	-2	-2	1	0	.	0	28.6	10	30	0	0
24	24	1	0	.	.	.	.	3	0	1	14	-2	-2	1	0	.	0	28.6	10	30	0	0
24	24	1	0	.	.	.	.	10	0	2	14	-2	-2	1	0	.	0	28.6	10	30	0	0
24	24	1	0	.	.	.	.	3	0	1	15	6.021	412	0	0	.	0	28.6	10	30	0	0
24	24	1	0	.	.	.	.	10	0	2	15	6.1629	474.8	0	0	.	0	28.6	10	30	0	0
24	24	1	0	.	.	.	.	3	0	1	16	-2	-2	1	0	.	0	28.6	10	30	0	0
24	24	1	0	.	.	.	.	10	0	2	16	-2	-2	1	0	.	0	28.6	10	30	0	0
24	24	1	0	.	.	.	.	3	0	1	17	-2	-2	1	0	.	0	28.6	10	30	0	0
24	24	1	0	.	.	.	.	10	0	2	17	-2	-2	1	0	.	0	28.6	10	30	0	0
24	24	1	0	.	.	.	.	3	0	1	18	5.5215	250	0	0	.	0	28.6	10	30	0	0
24	24	1	0	.	.	.	.	10	0	2	18	5.9391	379.6	0	0	.	0	28.6	10	30	0	0
24	24	1	0	.	.	.	.	3	0	1	19	-2	-2	1	0	.	0	28.6	10	30	0	0
24	24	1	0	.	.	.	.	10	0	2	19	-2	-2	1	0	.	0	28.6	10	30	0	0
24	24	1	0	.	.	.	.	3	0	1	20	-2	-2	1	0	.	0	28.6	10	30	0	0
24	24	1	0	.	.	.	.	10	0	2	20	-2	-2	1	0	.	0	28.6	10	30	0	0
24	24	1	0	.	.	.	.	3	0	1	21	5.6058	272	0	0	.	0	28.6	10	30	0	0
24	24	1	0	.	.	.	.	10	0	2	21	5.2279	186.4	0	0	.	0	28.6	10	30	0	0
24	24	1	0	.	.	.	.	3	0	1	22	-2	-2	1	0	.	0	28.6	10	30	0	0
24	24	1	0	.	.	.	.	10	0	2	22	-2	-2	1	0	.	0	28.6	10	30	0	0
24	24	1	0	.	.	.	.	3	0	1	23	-2	-2	1	0	.	0	28.6	10	30	0	0
24	24	1	0	.	.	.	.	10	0	2	23	-2	-2	1	0	.	0	28.6	10	30	0	0
24	24	1	0	1.00E-05	1.00E-05	.	.	1	1	0	24	-1	-1	1	0	.	0	28.6	10	30	0	0
24	24	1	0	1.00E-05	1.00E-05	.	.	2	1	0	24	-1	-1	1	0	.	0	28.6	10	30	0	0
24	24	1	0	.	.	.	.	3	0	1	24	5.649	284	0	0	.	0	28.6	10	30	0	0
24	24	1	0	.	.	.	.	10	0	2	24	6.0256	413.9	0	0	.	0	28.6	10	30	0	0
24	24	1	0	.	.	.	.	3	0	1	25	5.6276	278	0	0	.	0	28.6	10	30	0	0
24	24	1	0	.	.	.	.	10	0	2	25	5.6305	278.8	0	0	.	0	28.6	10	30	0	0
24	24	1	0	.	.	.	.	3	0	1	26	5.5835	266	0	0	.	0	28.6	10	30	0	0
24	24	1	0	.	.	.	.	10	0	2	26	6.1088	449.8	0	0	.	0	28.6	10	30	0	0
24	24	1	0	.	.	.	.	3	0	1	27	5.6836	294	0	0	.	0	28.6	10	30	0	0
24	24	1	0	.	.	.	.	10	0	2	27	5.3863	218.4	0	0	.	0	28.6	10	30	0	0
24	24	1	0	.	.	.	.	3	0	1	28	5.7236	306	0	0	.	0	28.6	10	30	0	0
24	24	1	0	.	.	.	.	10	0	2	28	6.1563	471.7	0	0	.	0	28.6	10	30	0	0
24	24	1	0	.	.	.	.	3	0	1	29	5.793	328	0	0	.	0	28.6	10	30	0	0
24	24	1	0	.	.	.	.	10	0	2	29	6.1364	462.4	0	0	.	0	28.6	10	30	0	0
24	24	1	0	.	.	.	.	3	0	1	30	6.0307	416	0	0	.	0	28.6	10	30	0	0
24	24	1	0	.	.	.	.	10	0	2	30	6.0176	410.6	0	0	.	0	28.6	10	30	0	0
25	25	1	1	168.6	168600	28.1	28100	1	1	0	24	-1	-1	1	0	.	0	28.1	10	6	0	0
25	25	1	1	168.6	168600	28.1	28100	2	1	0	24	-1	-1	1	0	.	0	28.1	10	6	0	0
25	25	1	1	.	.	.	.	3	0	1	24	7.2528	1412	0	0	.	0	28.1	10	6	0	0
25	25	1	1	.	.	.	.	10	0	2	24	1.5892	4.9	0	0	.	0	28.1	10	6	0	0
25	25	1	1	.	.	.	.	3	0	1	25	10.5629	38672	0	0	.	0	28.1	10	6	0	0
25	25	1	1	.	.	.	.	10	0	2	25	7.7942	2426.5	0	0	.	0	28.1	10	6	0	0
25	25	1	1	.	.	.	.	3	0	1	26	9.1538	9450	0	0	.	0	28.1	10	6	0	0
25	25	1	1	.	.	.	.	10	0	2	26	8.3526	4241.3	0	0	.	0	28.1	10	6	0	0
25	25	1	1	.	.	.	.	3	0	1	27	8.6041	5454	0	0	.	0	28.1	10	6	0	0
25	25	1	1	.	.	.	.	10	0	2	27	8.3313	4152	0	0	.	0	28.1	10	6	0	0
25	25	1	1	.	.	.	.	3	0	1	28	8.4083	4484	0	0	.	0	28.1	10	6	0	0
25	25	1	1	.	.	.	.	10	0	2	28	8.1674	3524.1	0	0	.	0	28.1	10	6	0	0
25	25	1	1	.	.	.	.	3	0	1	29	8.1274	3386	0	0	.	0	28.1	10	6	0	0
25	25	1	1	.	.	.	.	10	0	2	29	8.4769	4802.7	0	0	.	0	28.1	10	6	0	0
25	25	1	1	.	.	.	.	3	0	1	30	8.0379	3096	0	0	.	0	28.1	10	6	0	0
25	25	1	1	.	.	.	.	10	0	2	30	8.6299	5596.5	0	0	.	0	28.1	10	6	0	0
26	26	1	4	652.8	652800	108.8	108800	1	1	0	24	-1	-1	1	0	.	0	27.2	10	6	0	0
26	26	1	4	652.8	652800	108.8	108800	2	1	0	24	-1	-1	1	0	.	0	27.2	10	6	0	0
26	26	1	4	.	.	.	.	3	0	1	24	5.5452	256	0	0	.	0	27.2	10	6	0	0
26	26	1	4	.	.	.	.	10	0	2	24	5.6856	294.6	0	0	.	0	27.2	10	6	0	0
26	26	1	4	.	.	.	.	3	0	1	25	10.4301	33864	0	0	.	0	27.2	10	6	0	0
26	26	1	4	.	.	.	.	10	0	2	25	7.2093	1351.9	0	0	.	0	27.2	10	6	0	0
26	26	1	4	.	.	.	.	3	0	1	26	10.7348	45928	0	0	.	0	27.2	10	6	0	0
26	26	1	4	.	.	.	.	10	0	2	26	8.3048	4043.1	0	0	.	0	27.2	10	6	0	0
26	26	1	4	.	.	.	.	3	0	1	27	9.0674	8668	0	0	.	0	27.2	10	6	0	0
26	26	1	4	.	.	.	.	10	0	2	27	8.4051	4469.6	0	0	.	0	27.2	10	6	0	0
26	26	1	4	.	.	.	.	3	0	1	28	8.8036	6658	0	0	.	0	27.2	10	6	0	0
26	26	1	4	.	.	.	.	10	0	2	28	8.4295	4580.1	0	0	.	0	27.2	10	6	0	0
26	26	1	4	.	.	.	.	3	0	1	29	8.5132	4980	0	0	.	0	27.2	10	6	0	0
26	26	1	4	.	.	.	.	10	0	2	29	8.3492	4227	0	0	.	0	27.2	10	6	0	0
26	26	1	4	.	.	.	.	3	0	1	30	8.2003	3642	0	0	.	0	27.2	10	6	0	0
26	26	1	4	.	.	.	.	10	0	2	30	8.3247	4124.4	0	0	.	0	27.2	10	6	0	0
27	27	1	0	1.00E-05	1.00E-05	.	.	1	1	0	0	-1	-1	1	0	.	0	29.2	10	30	0	0
27	27	1	0	1.00E-05	1.00E-05	.	.	2	1	0	0	-1	-1	1	0	.	0	29.2	10	30	0	0
27	27	1	0	.	.	.	.	3	0	1	0	5.6419	282	0	0	.	0	29.2	10	30	0	0
27	27	1	0	.	.	.	.	10	0	2	0	5.2279	186.4	0	0	.	0	29.2	10	30	0	0
27	27	1	0	.	.	.	.	3	0	1	1	5.4806	240	0	0	.	0	29.2	10	30	0	0
27	27	1	0	.	.	.	.	10	0	2	1	5.5653	261.2	0	0	.	0	29.2	10	30	0	0
27	27	1	0	.	.	.	.	3	0	1	2	5.3083	202	0	0	.	0	29.2	10	30	0	0
27	27	1	0	.	.	.	.	10	0	2	2	4.967	143.6	0	0	.	0	29.2	10	30	0	0
27	27	1	0	.	.	.	.	3	0	1	3	5.663	288	0	0	.	0	29.2	10	30	0	0
27	27	1	0	.	.	.	.	10	0	2	3	4.3808	79.9	0	0	.	0	29.2	10	30	0	0
27	27	1	0	.	.	.	.	3	0	1	4	5.6058	272	0	0	.	0	29.2	10	30	0	0
27	27	1	0	.	.	.	.	10	0	2	4	4.9185	136.8	0	0	.	0	29.2	10	30	0	0
27	27	1	0	.	.	.	.	3	0	1	5	5.8289	340	0	0	.	0	29.2	10	30	0	0
27	27	1	0	.	.	.	.	10	0	2	5	5.838	343.1	0	0	.	0	29.2	10	30	0	0
27	27	1	0	.	.	.	.	3	0	1	6	5.6419	282	0	0	.	0	29.2	10	30	0	0
27	27	1	0	.	.	.	.	10	0	2	6	5.849	346.9	0	0	.	0	29.2	10	30	0	0
27	27	1	0	.	.	.	.	3	0	1	7	-2	-2	1	0	.	0	29.2	10	30	0	0
27	27	1	0	.	.	.	.	10	0	2	7	-2	-2	1	0	.	0	29.2	10	30	0	0
27	27	1	0	.	.	.	.	3	0	1	8	-2	-2	1	0	.	0	29.2	10	30	0	0
27	27	1	0	.	.	.	.	10	0	2	8	-2	-2	1	0	.	0	29.2	10	30	0	0
27	27	1	0	.	.	.	.	3	0	1	9	5.717	304	0	0	.	0	29.2	10	30	0	0
27	27	1	0	.	.	.	.	10	0	2	9	6.3119	551.1	0	0	.	0	29.2	10	30	0	0
27	27	1	0	.	.	.	.	3	0	1	10	-2	-2	1	0	.	0	29.2	10	30	0	0
27	27	1	0	.	.	.	.	10	0	2	10	-2	-2	1	0	.	0	29.2	10	30	0	0
27	27	1	0	.	.	.	.	3	0	1	11	-2	-2	1	0	.	0	29.2	10	30	0	0
27	27	1	0	.	.	.	.	10	0	2	11	-2	-2	1	0	.	0	29.2	10	30	0	0
27	27	1	0	.	.	.	.	3	0	1	12	5.5452	256	0	0	.	0	29.2	10	30	0	0
27	27	1	0	.	.	.	.	10	0	2	12	5.1642	174.9	0	0	.	0	29.2	10	30	0	0
27	27	1	0	.	.	.	.	3	0	1	13	-2	-2	1	0	.	0	29.2	10	30	0	0
27	27	1	0	.	.	.	.	10	0	2	13	-2	-2	1	0	.	0	29.2	10	30	0	0
27	27	1	0	.	.	.	.	3	0	1	14	-2	-2	1	0	.	0	29.2	10	30	0	0
27	27	1	0	.	.	.	.	10	0	2	14	-2	-2	1	0	.	0	29.2	10	30	0	0
27	27	1	0	.	.	.	.	3	0	1	15	5.6276	278	0	0	.	0	29.2	10	30	0	0
27	27	1	0	.	.	.	.	10	0	2	15	5.743	312	0	0	.	0	29.2	10	30	0	0
27	27	1	0	.	.	.	.	3	0	1	16	-2	-2	1	0	.	0	29.2	10	30	0	0
27	27	1	0	.	.	.	.	10	0	2	16	-2	-2	1	0	.	0	29.2	10	30	0	0
27	27	1	0	.	.	.	.	3	0	1	17	-2	-2	1	0	.	0	29.2	10	30	0	0
27	27	1	0	.	.	.	.	10	0	2	17	-2	-2	1	0	.	0	29.2	10	30	0	0
27	27	1	0	.	.	.	.	3	0	1	18	5.649	284	0	0	.	0	29.2	10	30	0	0
27	27	1	0	.	.	.	.	10	0	2	18	5.1968	180.7	0	0	.	0	29.2	10	30	0	0
27	27	1	0	.	.	.	.	3	0	1	19	-2	-2	1	0	.	0	29.2	10	30	0	0
27	27	1	0	.	.	.	.	10	0	2	19	-2	-2	1	0	.	0	29.2	10	30	0	0
27	27	1	0	.	.	.	.	3	0	1	20	-2	-2	1	0	.	0	29.2	10	30	0	0
27	27	1	0	.	.	.	.	10	0	2	20	-2	-2	1	0	.	0	29.2	10	30	0	0
27	27	1	0	.	.	.	.	3	0	1	21	5.4638	236	0	0	.	0	29.2	10	30	0	0
27	27	1	0	.	.	.	.	10	0	2	21	5.2279	186.4	0	0	.	0	29.2	10	30	0	0
27	27	1	0	.	.	.	.	3	0	1	22	-2	-2	1	0	.	0	29.2	10	30	0	0
27	27	1	0	.	.	.	.	10	0	2	22	-2	-2	1	0	.	0	29.2	10	30	0	0
27	27	1	0	.	.	.	.	3	0	1	23	-2	-2	1	0	.	0	29.2	10	30	0	0
27	27	1	0	.	.	.	.	10	0	2	23	-2	-2	1	0	.	0	29.2	10	30	0	0
27	27	1	0	1.00E-05	1.00E-05	.	.	1	1	0	24	-1	-1	1	0	.	0	29.2	10	30	0	0
27	27	1	0	1.00E-05	1.00E-05	.	.	2	1	0	24	-1	-1	1	0	.	0	29.2	10	30	0	0
27	27	1	0	.	.	.	.	3	0	1	24	5.0999	164	0	0	.	0	29.2	10	30	0	0
27	27	1	0	.	.	.	.	10	0	2	24	4.8081	122.5	0	0	.	0	29.2	10	30	0	0
27	27	1	0	.	.	.	.	3	0	1	25	5.112	166	0	0	.	0	29.2	10	30	0	0
27	27	1	0	.	.	.	.	10	0	2	25	5.012	150.2	0	0	.	0	29.2	10	30	0	0
27	27	1	0	.	.	.	.	3	0	1	26	5.2364	188	0	0	.	0	29.2	10	30	0	0
27	27	1	0	.	.	.	.	10	0	2	26	5.2279	186.4	0	0	.	0	29.2	10	30	0	0
27	27	1	0	.	.	.	.	3	0	1	27	5.2781	196	0	0	.	0	29.2	10	30	0	0
27	27	1	0	.	.	.	.	10	0	2	27	5.7034	299.9	0	0	.	0	29.2	10	30	0	0
27	27	1	0	.	.	.	.	3	0	1	28	5.3083	202	0	0	.	0	29.2	10	30	0	0
27	27	1	0	.	.	.	.	10	0	2	28	5.1642	174.9	0	0	.	0	29.2	10	30	0	0
27	27	1	0	.	.	.	.	3	0	1	29	5.4806	240	0	0	.	0	29.2	10	30	0	0
27	27	1	0	.	.	.	.	10	0	2	29	6.1431	465.5	0	0	.	0	29.2	10	30	0	0
27	27	1	0	.	.	.	.	3	0	1	30	5.2257	186	0	0	.	0	29.2	10	30	0	0
27	27	1	0	.	.	.	.	10	0	2	30	5.4922	242.8	0	0	.	0	29.2	10	30	0	0
28	1	2	0.063	47.48	47480	1.978	1978	1	1	0	0	-1	-1	1	0	.	0	31.4	10	24	0	0
28	1	2	0.063	41.13	41130	1.714	1714	2	1	0	0	-1	-1	1	0	.	0	31.4	10	24	0	0
28	1	2	0.063	.	.	.	.	3	0	1	0	4.6259	102.09	0	0	.	0	31.4	10	24	0	0
28	1	2	0.063	.	.	.	.	10	0	2	0	2.0794	8	0	0	.	0	31.4	10	24	0	0
28	1	2	0.063	.	.	.	.	3	0	1	3	5.9713	392	0	0	.	0	31.4	10	24	0	0
28	1	2	0.063	.	.	.	.	10	0	2	3	4.4067	82	0	0	.	0	31.4	10	24	0	0
28	1	2	0.063	.	.	.	.	3	0	1	6	5.2149	184	0	0	.	0	31.4	10	24	0	0
28	1	2	0.063	.	.	.	.	10	0	2	6	4.3567	78	0	0	.	0	31.4	10	24	0	0
28	1	2	0.063	.	.	.	.	3	0	1	9	4.6634	106	0	0	.	0	31.4	10	24	0	0
28	1	2	0.063	.	.	.	.	10	0	2	9	3.2958	27	0	0	.	0	31.4	10	24	0	0
28	1	2	0.063	.	.	.	.	3	0	1	12	4.4998	90	0	0	.	0	31.4	10	24	0	0
28	1	2	0.063	.	.	.	.	10	0	2	12	3.6889	40	0	0	.	0	31.4	10	24	0	0
28	1	2	0.063	.	.	.	.	3	0	1	15	4.2767	72	0	0	.	0	31.4	10	24	0	0
28	1	2	0.063	.	.	.	.	10	0	2	15	3.2958	27	0	0	.	0	31.4	10	24	0	0
28	1	2	0.063	.	.	.	.	3	0	1	18	4.5433	94	0	0	.	0	31.4	10	24	0	0
28	1	2	0.063	.	.	.	.	10	0	2	18	3.6889	40	0	0	.	0	31.4	10	24	0	0
28	1	2	0.063	.	.	.	.	3	0	1	21	4.4067	82	0	0	.	0	31.4	10	24	0	0
28	1	2	0.063	.	.	.	.	10	0	2	21	3.6109	37	0	0	.	0	31.4	10	24	0	0
28	1	2	0.063	.	.	.	.	3	0	1	24	4.4543	86	0	0	.	0	31.4	10	24	0	0
28	1	2	0.063	.	.	.	.	10	0	2	24	3.6376	38	0	0	.	0	31.4	10	24	0	0
29	2	2	0.063	45.36	45360	1.89	1890	1	1	0	0	-1	-1	1	0	.	0	27.2	10	24	0	0
29	2	2	0.063	49.59	49590	2.066	2066	2	1	0	0	-1	-1	1	0	.	0	27.2	10	24	0	0
29	2	2	0.063	.	.	.	.	3	0	1	0	4.6996	109.9	0	0	.	0	27.2	10	24	0	0
29	2	2	0.063	.	.	.	.	10	0	2	0	3.7136	41	0	0	.	0	27.2	10	24	0	0
29	2	2	0.063	.	.	.	.	3	0	1	3	6.5793	720	0	0	.	0	27.2	10	24	0	0
29	2	2	0.063	.	.	.	.	10	0	2	3	4.7536	116	0	0	.	0	27.2	10	24	0	0
29	2	2	0.063	.	.	.	.	3	0	1	6	5.8916	362	0	0	.	0	27.2	10	24	0	0
29	2	2	0.063	.	.	.	.	10	0	2	6	4.0254	56	0	0	.	0	27.2	10	24	0	0
29	2	2	0.063	.	.	.	.	3	0	1	9	5.0239	152	0	0	.	0	27.2	10	24	0	0
29	2	2	0.063	.	.	.	.	10	0	2	9	3.2958	27	0	0	.	0	27.2	10	24	0	0
29	2	2	0.063	.	.	.	.	3	0	1	12	5.0752	160	0	0	.	0	27.2	10	24	0	0
29	2	2	0.063	.	.	.	.	10	0	2	12	3.6889	40	0	0	.	0	27.2	10	24	0	0
29	2	2	0.063	.	.	.	.	3	0	1	15	4.7185	112	0	0	.	0	27.2	10	24	0	0
29	2	2	0.063	.	.	.	.	10	0	2	15	3.6889	40	0	0	.	0	27.2	10	24	0	0
29	2	2	0.063	.	.	.	.	3	0	1	18	4.5218	92	0	0	.	0	27.2	10	24	0	0
29	2	2	0.063	.	.	.	.	10	0	2	18	2.8904	18	0	0	.	0	27.2	10	24	0	0
29	2	2	0.063	.	.	.	.	3	0	1	21	4.1271	62	0	0	.	0	27.2	10	24	0	0
29	2	2	0.063	.	.	.	.	10	0	2	21	3.2189	25	0	0	.	0	27.2	10	24	0	0
29	2	2	0.063	.	.	.	.	3	0	1	24	4.4067	82	0	0	.	0	27.2	10	24	0	0
29	2	2	0.063	.	.	.	.	10	0	2	24	3.2189	25	0	0	.	0	27.2	10	24	0	0
30	3	2	0.063	44.3	44300	1.846	1846	1	1	0	0	-1	-1	1	0	.	0	30	10	24	0	0
30	3	2	0.063	41.88	41880	1.745	1745	2	1	0	0	-1	-1	1	0	.	0	30	10	24	0	0
30	3	2	0.063	.	.	.	.	3	0	1	0	5.5446	255.86	0	0	.	0	30	10	24	0	0
30	3	2	0.063	.	.	.	.	10	0	2	0	4.6385	103.39	0	0	.	0	30	10	24	0	0
30	3	2	0.063	.	.	.	.	3	0	1	3	7.0733	1180	0	0	.	0	30	10	24	0	0
30	3	2	0.063	.	.	.	.	10	0	2	3	5.9366	378.66	0	0	.	0	30	10	24	0	0
30	3	2	0.063	.	.	.	.	3	0	1	6	6.4135	610	0	0	.	0	30	10	24	0	0
30	3	2	0.063	.	.	.	.	10	0	2	6	5.508	246.66	0	0	.	0	30	10	24	0	0
30	3	2	0.063	.	.	.	.	3	0	1	9	5.9189	372	0	0	.	0	30	10	24	0	0
30	3	2	0.063	.	.	.	.	10	0	2	9	5.2379	188.27	0	0	.	0	30	10	24	0	0
30	3	2	0.063	.	.	.	.	3	0	1	12	6.045	422	0	0	.	0	30	10	24	0	0
30	3	2	0.063	.	.	.	.	10	0	2	12	5.4279	227.66	0	0	.	0	30	10	24	0	0
30	3	2	0.063	.	.	.	.	3	0	1	15	5.9081	368	0	0	.	0	30	10	24	0	0
30	3	2	0.063	.	.	.	.	10	0	2	15	5.2729	194.98	0	0	.	0	30	10	24	0	0
30	3	2	0.063	.	.	.	.	3	0	1	18	5.6768	292	0	0	.	0	30	10	24	0	0
30	3	2	0.063	.	.	.	.	10	0	2	18	5.2614	192.75	0	0	.	0	30	10	24	0	0
30	3	2	0.063	.	.	.	.	3	0	1	21	5.4116	224	0	0	.	0	30	10	24	0	0
30	3	2	0.063	.	.	.	.	10	0	2	21	5.1222	167.71	0	0	.	0	30	10	24	0	0
30	3	2	0.063	.	.	.	.	3	0	1	24	5.9189	372	0	0	.	0	30	10	24	0	0
30	3	2	0.063	.	.	.	.	10	0	2	24	5.349	210.4	0	0	.	0	30	10	24	0	0
31	4	2	0.063	42.94	42940	1.789	1789	1	1	0	0	-1	-1	1	0	.	0	32.8	10	24	0	0
31	4	2	0.063	38.71	38710	1.613	1613	2	1	0	0	-1	-1	1	0	.	0	32.8	10	24	0	0
31	4	2	0.063	.	.	.	.	3	0	1	0	5.9407	380.19	0	0	.	0	32.8	10	24	0	0
31	4	2	0.063	.	.	.	.	10	0	2	0	3.781	43.86	0	0	.	0	32.8	10	24	0	0
31	4	2	0.063	.	.	.	.	3	0	1	3	6.9197	1012	0	0	.	0	32.8	10	24	0	0
31	4	2	0.063	.	.	.	.	10	0	2	3	5.6331	279.53	0	0	.	0	32.8	10	24	0	0
31	4	2	0.063	.	.	.	.	3	0	1	6	6.1269	458	0	0	.	0	32.8	10	24	0	0
31	4	2	0.063	.	.	.	.	10	0	2	6	5.4555	234.04	0	0	.	0	32.8	10	24	0	0
31	4	2	0.063	.	.	.	.	3	0	1	9	5.6276	278	0	0	.	0	32.8	10	24	0	0
31	4	2	0.063	.	.	.	.	10	0	2	9	4.8806	131.71	0	0	.	0	32.8	10	24	0	0
31	4	2	0.063	.	.	.	.	3	0	1	12	5.7869	326	0	0	.	0	32.8	10	24	0	0
31	4	2	0.063	.	.	.	.	10	0	2	12	4.8011	121.64	0	0	.	0	32.8	10	24	0	0
31	4	2	0.063	.	.	.	.	3	0	1	15	5.6904	296	0	0	.	0	32.8	10	24	0	0
31	4	2	0.063	.	.	.	.	10	0	2	15	5.328	206.03	0	0	.	0	32.8	10	24	0	0
31	4	2	0.063	.	.	.	.	3	0	1	18	5.6348	280	0	0	.	0	32.8	10	24	0	0
31	4	2	0.063	.	.	.	.	10	0	2	18	4.8614	129.21	0	0	.	0	32.8	10	24	0	0
31	4	2	0.063	.	.	.	.	3	0	1	21	5.5215	250	0	0	.	0	32.8	10	24	0	0
31	4	2	0.063	.	.	.	.	10	0	2	21	4.7355	113.92	0	0	.	0	32.8	10	24	0	0
31	4	2	0.063	.	.	.	.	3	0	1	24	5.4467	232	0	0	.	0	32.8	10	24	0	0
31	4	2	0.063	.	.	.	.	10	0	2	24	5.2614	192.75	0	0	.	0	32.8	10	24	0	0
32	5	2	0.063	41.88	41880	1.745	1745	1	1	0	0	-1	-1	1	0	.	0	29.3	10	24	0	0
32	5	2	0.063	47.17	47170	1.966	1966	2	1	0	0	-1	-1	1	0	.	0	29.3	10	24	0	0
32	5	2	0.063	.	.	.	.	3	0	1	0	5.4111	223.87	0	0	.	0	29.3	10	24	0	0
32	5	2	0.063	.	.	.	.	10	0	2	0	3.4494	31.48	0	0	.	0	29.3	10	24	0	0
32	5	2	0.063	.	.	.	.	3	0	1	3	6.7569	860	0	0	.	0	29.3	10	24	0	0
32	5	2	0.063	.	.	.	.	10	0	2	3	5.0377	154.11	0	0	.	0	29.3	10	24	0	0
32	5	2	0.063	.	.	.	.	3	0	1	6	6.48	652	0	0	.	0	29.3	10	24	0	0
32	5	2	0.063	.	.	.	.	10	0	2	6	5.4852	241.09	0	0	.	0	29.3	10	24	0	0
32	5	2	0.063	.	.	.	.	3	0	1	9	5.717	304	0	0	.	0	29.3	10	24	0	0
32	5	2	0.063	.	.	.	.	10	0	2	9	3.7959	44.52	0	0	.	0	29.3	10	24	0	0
32	5	2	0.063	.	.	.	.	3	0	1	12	5.3471	210	0	0	.	0	29.3	10	24	0	0
32	5	2	0.063	.	.	.	.	10	0	2	12	3.7959	44.52	0	0	.	0	29.3	10	24	0	0
32	5	2	0.063	.	.	.	.	3	0	1	15	5.5053	246	0	0	.	0	29.3	10	24	0	0
32	5	2	0.063	.	.	.	.	10	0	2	15	4.0856	59.48	0	0	.	0	29.3	10	24	0	0
32	5	2	0.063	.	.	.	.	3	0	1	18	5.3566	212	0	0	.	0	29.3	10	24	0	0
32	5	2	0.063	.	.	.	.	10	0	2	18	3.863	47.61	0	0	.	0	29.3	10	24	0	0
32	5	2	0.063	.	.	.	.	3	0	1	21	5.3083	202	0	0	.	0	29.3	10	24	0	0
32	5	2	0.063	.	.	.	.	10	0	2	21	4.0856	59.48	0	0	.	0	29.3	10	24	0	0
32	5	2	0.063	.	.	.	.	3	0	1	24	5.0876	162	0	0	.	0	29.3	10	24	0	0
32	5	2	0.063	.	.	.	.	10	0	2	24	3.4494	31.48	0	0	.	0	29.3	10	24	0	0
33	6	2	0.063	45.06	45060	1.877	1877	1	1	0	0	-1	-1	1	0	.	0	27.7	10	24	0	0
33	6	2	0.063	43.09	43090	1.796	1796	2	1	0	0	-1	-1	1	0	.	0	27.7	10	24	0	0
33	6	2	0.063	.	.	.	.	3	0	1	0	5.2775	195.88	0	0	.	0	27.7	10	24	0	0
33	6	2	0.063	.	.	.	.	10	0	2	0	4.9879	146.63	0	0	.	0	27.7	10	24	0	0
33	6	2	0.063	.	.	.	.	3	0	1	3	7.854	2576	0	0	.	0	27.7	10	24	0	0
33	6	2	0.063	.	.	.	.	10	0	2	3	5.7602	317.42	0	0	.	0	27.7	10	24	0	0
33	6	2	0.063	.	.	.	.	3	0	1	6	7.5283	1860	0	0	.	0	27.7	10	24	0	0
33	6	2	0.063	.	.	.	.	10	0	2	6	4.9242	137.58	0	0	.	0	27.7	10	24	0	0
33	6	2	0.063	.	.	.	.	3	0	1	9	7.1483	1272	0	0	.	0	27.7	10	24	0	0
33	6	2	0.063	.	.	.	.	10	0	2	9	5.1086	165.44	0	0	.	0	27.7	10	24	0	0
33	6	2	0.063	.	.	.	.	3	0	1	12	6.3665	582	0	0	.	0	27.7	10	24	0	0
33	6	2	0.063	.	.	.	.	10	0	2	12	5.0132	150.38	0	0	.	0	27.7	10	24	0	0
33	6	2	0.063	.	.	.	.	3	0	1	15	6.2265	506	0	0	.	0	27.7	10	24	0	0
33	6	2	0.063	.	.	.	.	10	0	2	15	5.2716	194.73	0	0	.	0	27.7	10	24	0	0
33	6	2	0.063	.	.	.	.	3	0	1	18	5.8348	342	0	0	.	0	27.7	10	24	0	0
33	6	2	0.063	.	.	.	.	10	0	2	18	5.5424	255.3	0	0	.	0	27.7	10	24	0	0
33	6	2	0.063	.	.	.	.	3	0	1	21	6.0776	436	0	0	.	0	27.7	10	24	0	0
33	6	2	0.063	.	.	.	.	10	0	2	21	5.0463	155.44	0	0	.	0	27.7	10	24	0	0
33	6	2	0.063	.	.	.	.	3	0	1	24	6.0307	416	0	0	.	0	27.7	10	24	0	0
33	6	2	0.063	.	.	.	.	10	0	2	24	5.0463	155.44	0	0	.	0	27.7	10	24	0	0
34	7	2	0.063	41.58	41580	1.732	1732	1	1	0	0	-1	-1	1	0	.	0	28.4	10	24	0	0
34	7	2	0.063	40.07	40070	1.67	1670	2	1	0	0	-1	-1	1	0	.	0	28.4	10	24	0	0
34	7	2	0.063	.	.	.	.	3	0	1	0	4.9828	145.88	0	0	.	0	28.4	10	24	0	0
34	7	2	0.063	.	.	.	.	10	0	2	0	2.5233	12.47	0	0	.	0	28.4	10	24	0	0
34	7	2	0.063	.	.	.	.	3	0	1	3	6.1985	492	0	0	.	0	28.4	10	24	0	0
34	7	2	0.063	.	.	.	.	10	0	2	3	4.6739	107.11	0	0	.	0	28.4	10	24	0	0
34	7	2	0.063	.	.	.	.	3	0	1	6	5.9661	390	0	0	.	0	28.4	10	24	0	0
34	7	2	0.063	.	.	.	.	10	0	2	6	5.6445	282.73	0	0	.	0	28.4	10	24	0	0
34	7	2	0.063	.	.	.	.	3	0	1	9	5.4889	242	0	0	.	0	28.4	10	24	0	0
34	7	2	0.063	.	.	.	.	10	0	2	9	4.6739	107.11	0	0	.	0	28.4	10	24	0	0
34	7	2	0.063	.	.	.	.	3	0	1	12	5.204	182	0	0	.	0	28.4	10	24	0	0
34	7	2	0.063	.	.	.	.	10	0	2	12	4.3334	76.2	0	0	.	0	28.4	10	24	0	0
34	7	2	0.063	.	.	.	.	3	0	1	15	4.9273	138	0	0	.	0	28.4	10	24	0	0
34	7	2	0.063	.	.	.	.	10	0	2	15	4.4013	81.56	0	0	.	0	28.4	10	24	0	0
34	7	2	0.063	.	.	.	.	3	0	1	18	4.7005	110	0	0	.	0	28.4	10	24	0	0
34	7	2	0.063	.	.	.	.	10	0	2	18	4.2971	73.49	0	0	.	0	28.4	10	24	0	0
34	7	2	0.063	.	.	.	.	3	0	1	21	5.1475	172	0	0	.	0	28.4	10	24	0	0
34	7	2	0.063	.	.	.	.	10	0	2	21	4.6015	99.63	0	0	.	0	28.4	10	24	0	0
34	7	2	0.063	.	.	.	.	3	0	1	24	5.1591	174	0	0	.	0	28.4	10	24	0	0
34	7	2	0.063	.	.	.	.	10	0	2	24	4.7816	119.29	0	0	.	0	28.4	10	24	0	0
35	8	2	0.063	47.48	47480	1.978	1978	1	1	0	0	-1	-1	1	0	.	0	25.6	10	24	0	0
35	8	2	0.063	40.82	40820	1.701	1701	2	1	0	0	-1	-1	1	0	.	0	25.6	10	24	0	0
35	8	2	0.063	.	.	.	.	3	0	1	0	5.7357	309.74	0	0	.	0	25.6	10	24	0	0
35	8	2	0.063	.	.	.	.	10	0	2	0	2.3026	10	0	0	.	0	25.6	10	24	0	0
35	8	2	0.063	.	.	.	.	3	0	1	3	8.2433	3802	0	0	.	0	25.6	10	24	0	0
35	8	2	0.063	.	.	.	.	10	0	2	3	7.0515	1154.63	0	0	.	0	25.6	10	24	0	0
35	8	2	0.063	.	.	.	.	3	0	1	6	7.688	2182	0	0	.	0	25.6	10	24	0	0
35	8	2	0.063	.	.	.	.	10	0	2	6	7.2498	1407.84	0	0	.	0	25.6	10	24	0	0
35	8	2	0.063	.	.	.	.	3	0	1	9	7.142	1264	0	0	.	0	25.6	10	24	0	0
35	8	2	0.063	.	.	.	.	10	0	2	9	7.5944	1987	0	0	.	0	25.6	10	24	0	0
35	8	2	0.063	.	.	.	.	3	0	1	12	7.1686	1298	0	0	.	0	25.6	10	24	0	0
35	8	2	0.063	.	.	.	.	10	0	2	12	7.4907	1791.35	0	0	.	0	25.6	10	24	0	0
35	8	2	0.063	.	.	.	.	3	0	1	15	6.8287	924	0	0	.	0	25.6	10	24	0	0
35	8	2	0.063	.	.	.	.	10	0	2	15	6.3883	594.82	0	0	.	0	25.6	10	24	0	0
35	8	2	0.063	.	.	.	.	3	0	1	18	6.1612	474	0	0	.	0	25.6	10	24	0	0
35	8	2	0.063	.	.	.	.	10	0	2	18	5.6988	298.51	0	0	.	0	25.6	10	24	0	0
35	8	2	0.063	.	.	.	.	3	0	1	21	5.961	388	0	0	.	0	25.6	10	24	0	0
35	8	2	0.063	.	.	.	.	10	0	2	21	5.6183	275.43	0	0	.	0	25.6	10	24	0	0
35	8	2	0.063	.	.	.	.	3	0	1	24	5.8749	356	0	0	.	0	25.6	10	24	0	0
35	8	2	0.063	.	.	.	.	10	0	2	24	5.4855	241.17	0	0	.	0	25.6	10	24	0	0
36	9	2	0.063	41.88	41880	1.745	1745	1	1	0	0	-1	-1	1	0	.	0	27.7	10	24	0	0
36	9	2	0.063	40.82	40820	1.701	1701	2	1	0	0	-1	-1	1	0	.	0	27.7	10	24	0	0
36	9	2	0.063	.	.	.	.	3	0	1	0	5.5608	260.02	0	0	.	0	27.7	10	24	0	0
36	9	2	0.063	.	.	.	.	10	0	2	0	5.5598	259.76	0	0	.	0	27.7	10	24	0	0
36	9	2	0.063	.	.	.	.	3	0	1	3	6.8958	988.09	0	0	.	0	27.7	10	24	0	0
36	9	2	0.063	.	.	.	.	10	0	2	3	6.8958	988.09	0	0	.	0	27.7	10	24	0	0
36	9	2	0.063	.	.	.	.	3	0	1	6	6.2585	522.41	0	0	.	0	27.7	10	24	0	0
36	9	2	0.063	.	.	.	.	10	0	2	6	6.2585	522.41	0	0	.	0	27.7	10	24	0	0
36	9	2	0.063	.	.	.	.	3	0	1	9	5.9457	382.12	0	0	.	0	27.7	10	24	0	0
36	9	2	0.063	.	.	.	.	10	0	2	9	5.9457	382.12	0	0	.	0	27.7	10	24	0	0
36	9	2	0.063	.	.	.	.	3	0	1	12	5.7239	306.1	0	0	.	0	27.7	10	24	0	0
36	9	2	0.063	.	.	.	.	10	0	2	12	5.7239	306.1	0	0	.	0	27.7	10	24	0	0
36	9	2	0.063	.	.	.	.	3	0	1	15	5.4743	238.49	0	0	.	0	27.7	10	24	0	0
36	9	2	0.063	.	.	.	.	10	0	2	15	5.4743	238.49	0	0	.	0	27.7	10	24	0	0
36	9	2	0.063	.	.	.	.	3	0	1	18	5.3785	216.7	0	0	.	0	27.7	10	24	0	0
36	9	2	0.063	.	.	.	.	10	0	2	18	5.3785	216.7	0	0	.	0	27.7	10	24	0	0
36	9	2	0.063	.	.	.	.	3	0	1	21	5.5798	265.01	0	0	.	0	27.7	10	24	0	0
36	9	2	0.063	.	.	.	.	10	0	2	21	5.5798	265.01	0	0	.	0	27.7	10	24	0	0
36	9	2	0.063	.	.	.	.	3	0	1	24	5.4036	222.2	0	0	.	0	27.7	10	24	0	0
36	9	2	0.063	.	.	.	.	10	0	2	24	5.4036	222.2	0	0	.	0	27.7	10	24	0	0
37	10	2	0.25	172.2	172200	7.175	7175	1	1	0	0	-1	-1	1	0	.	0	31.2	10	24	0	0
37	10	2	0.25	172.2	172200	7.175	7175	2	1	0	0	-1	-1	1	0	.	0	31.2	10	24	0	0
37	10	2	0.25	.	.	.	.	3	0	1	0	5.2154	184.08	0	0	.	0	31.2	10	24	0	0
37	10	2	0.25	.	.	.	.	10	0	2	0	2.7997	16.44	0	0	.	0	31.2	10	24	0	0
37	10	2	0.25	.	.	.	.	3	0	1	3	7.1099	1224	0	0	.	0	31.2	10	24	0	0
37	10	2	0.25	.	.	.	.	10	0	2	3	5.9895	399.2	0	0	.	0	31.2	10	24	0	0
37	10	2	0.25	.	.	.	.	3	0	1	6	6.1442	466	0	0	.	0	31.2	10	24	0	0
37	10	2	0.25	.	.	.	.	10	0	2	6	5.3593	212.58	0	0	.	0	31.2	10	24	0	0
37	10	2	0.25	.	.	.	.	3	0	1	9	5.9081	368	0	0	.	0	31.2	10	24	0	0
37	10	2	0.25	.	.	.	.	10	0	2	9	5.0497	155.98	0	0	.	0	31.2	10	24	0	0
37	10	2	0.25	.	.	.	.	3	0	1	12	5.3566	212	0	0	.	0	31.2	10	24	0	0
37	10	2	0.25	.	.	.	.	10	0	2	12	4.5568	95.28	0	0	.	0	31.2	10	24	0	0
37	10	2	0.25	.	.	.	.	3	0	1	15	5.193	180	0	0	.	0	31.2	10	24	0	0
37	10	2	0.25	.	.	.	.	10	0	2	15	4.2416	69.52	0	0	.	0	31.2	10	24	0	0
37	10	2	0.25	.	.	.	.	3	0	1	18	5.2983	200	0	0	.	0	31.2	10	24	0	0
37	10	2	0.25	.	.	.	.	10	0	2	18	4.497	89.75	0	0	.	0	31.2	10	24	0	0
37	10	2	0.25	.	.	.	.	3	0	1	21	6.3801	590	0	0	.	0	31.2	10	24	0	0
37	10	2	0.25	.	.	.	.	10	0	2	21	4.0453	57.13	0	0	.	0	31.2	10	24	0	0
37	10	2	0.25	.	.	.	.	3	0	1	24	5.7104	302	0	0	.	0	31.2	10	24	0	0
37	10	2	0.25	.	.	.	.	10	0	2	24	4.4653	86.95	0	0	.	0	31.2	10	24	0	0
38	11	2	0.25	172.2	172200	7.175	7175	1	1	0	0	-1	-1	1	0	.	0	29.8	10	24	0	0
38	11	2	0.25	188.4	188400	7.85	7850	2	1	0	0	-1	-1	1	0	.	0	29.8	10	24	0	0
38	11	2	0.25	.	.	.	.	3	0	1	0	6.8663	959.4	0	0	.	0	29.8	10	24	0	0
38	11	2	0.25	.	.	.	.	10	0	2	0	5.7033	299.86	0	0	.	0	29.8	10	24	0	0
38	11	2	0.25	.	.	.	.	3	0	1	3	7.9266	2770	0	0	.	0	29.8	10	24	0	0
38	11	2	0.25	.	.	.	.	10	0	2	3	7.2524	1411.45	0	0	.	0	29.8	10	24	0	0
38	11	2	0.25	.	.	.	.	3	0	1	6	7.2064	1348	0	0	.	0	29.8	10	24	0	0
38	11	2	0.25	.	.	.	.	10	0	2	6	6.5751	717.04	0	0	.	0	29.8	10	24	0	0
38	11	2	0.25	.	.	.	.	3	0	1	9	6.8957	988	0	0	.	0	29.8	10	24	0	0
38	11	2	0.25	.	.	.	.	10	0	2	9	6.0417	420.59	0	0	.	0	29.8	10	24	0	0
38	11	2	0.25	.	.	.	.	3	0	1	12	6.8395	934	0	0	.	0	29.8	10	24	0	0
38	11	2	0.25	.	.	.	.	10	0	2	12	6.1944	490	0	0	.	0	29.8	10	24	0	0
38	11	2	0.25	.	.	.	.	3	0	1	15	6.8287	924	0	0	.	0	29.8	10	24	0	0
38	11	2	0.25	.	.	.	.	10	0	2	15	5.8269	339.32	0	0	.	0	29.8	10	24	0	0
38	11	2	0.25	.	.	.	.	3	0	1	18	6.8835	976	0	0	.	0	29.8	10	24	0	0
38	11	2	0.25	.	.	.	.	10	0	2	18	6.1944	490	0	0	.	0	29.8	10	24	0	0
38	11	2	0.25	.	.	.	.	3	0	1	21	6.1003	446	0	0	.	0	29.8	10	24	0	0
38	11	2	0.25	.	.	.	.	10	0	2	21	5.7302	308.02	0	0	.	0	29.8	10	24	0	0
38	11	2	0.25	.	.	.	.	3	0	1	24	5.9814	396	0	0	.	0	29.8	10	24	0	0
38	11	2	0.25	.	.	.	.	10	0	2	24	5.8804	357.97	0	0	.	0	29.8	10	24	0	0
39	12	2	0.25	163.2	163200	6.8	6800	1	1	0	0	-1	-1	1	0	.	0	28.5	10	24	0	0
39	12	2	0.25	180	180000	7.5	7500	2	1	0	0	-1	-1	1	0	.	0	28.5	10	24	0	0
39	12	2	0.25	.	.	.	.	3	0	1	0	7.815	2477.42	0	1	.	0	28.5	10	24	0	0
39	12	2	0.25	.	.	.	.	10	0	2	0	5.0328	153.36	0	0	.	0	28.5	10	24	0	0
39	12	2	0.25	.	.	.	.	3	0	1	3	7.7732	2376	0	0	.	0	28.5	10	24	0	0
39	12	2	0.25	.	.	.	.	10	0	2	3	6.4063	605.63	0	0	.	0	28.5	10	24	0	0
39	12	2	0.25	.	.	.	.	3	0	1	6	7.4685	1752	0	0	.	0	28.5	10	24	0	0
39	12	2	0.25	.	.	.	.	10	0	2	6	6.1296	459.24	0	0	.	0	28.5	10	24	0	0
39	12	2	0.25	.	.	.	.	3	0	1	9	6.6995	812	0	0	.	0	28.5	10	24	0	0
39	12	2	0.25	.	.	.	.	10	0	2	9	5.5993	270.23	0	0	.	0	28.5	10	24	0	0
39	12	2	0.25	.	.	.	.	3	0	1	12	6.2691	528	0	0	.	0	28.5	10	24	0	0
39	12	2	0.25	.	.	.	.	10	0	2	12	5.2245	185.76	0	0	.	0	28.5	10	24	0	0
39	12	2	0.25	.	.	.	.	3	0	1	15	6.1903	488	0	0	.	0	28.5	10	24	0	0
39	12	2	0.25	.	.	.	.	10	0	2	15	4.9713	144.21	0	0	.	0	28.5	10	24	0	0
39	12	2	0.25	.	.	.	.	3	0	1	18	6.2538	520	0	0	.	0	28.5	10	24	0	0
39	12	2	0.25	.	.	.	.	10	0	2	18	5.1929	179.99	0	0	.	0	28.5	10	24	0	0
39	12	2	0.25	.	.	.	.	3	0	1	21	5.112	166	0	0	.	0	28.5	10	24	0	0
39	12	2	0.25	.	.	.	.	10	0	2	21	5.5598	259.76	0	0	.	0	28.5	10	24	0	0
39	12	2	0.25	.	.	.	.	3	0	1	24	5.8406	344	0	0	.	0	28.5	10	24	0	0
39	12	2	0.25	.	.	.	.	10	0	2	24	4.8566	128.59	0	0	.	0	28.5	10	24	0	0
40	13	2	0.25	196.8	196800	8.2	8200	1	1	0	0	-1	-1	1	0	.	0	27.5	10	24	0	0
40	13	2	0.25	175.8	175800	7.325	7325	2	1	0	0	-1	-1	1	0	.	0	27.5	10	24	0	0
40	13	2	0.25	.	.	.	.	3	0	1	0	6.5578	704.69	0	0	.	0	27.5	10	24	0	0
40	13	2	0.25	.	.	.	.	10	0	2	0	3.6773	39.54	0	0	.	0	27.5	10	24	0	0
40	13	2	0.25	.	.	.	.	3	0	1	3	8.3719	4324	0	0	.	0	27.5	10	24	0	0
40	13	2	0.25	.	.	.	.	10	0	2	3	7.34	1540.75	0	0	.	0	27.5	10	24	0	0
40	13	2	0.25	.	.	.	.	3	0	1	6	7.2654	1430	0	0	.	0	27.5	10	24	0	0
40	13	2	0.25	.	.	.	.	10	0	2	6	6.5482	698.01	0	0	.	0	27.5	10	24	0	0
40	13	2	0.25	.	.	.	.	3	0	1	9	6.6359	762	0	0	.	0	27.5	10	24	0	0
40	13	2	0.25	.	.	.	.	10	0	2	9	5.2838	197.12	0	0	.	0	27.5	10	24	0	0
40	13	2	0.25	.	.	.	.	3	0	1	12	5.8972	364	0	0	.	0	27.5	10	24	0	0
40	13	2	0.25	.	.	.	.	10	0	2	12	5.0935	162.96	0	0	.	0	27.5	10	24	0	0
40	13	2	0.25	.	.	.	.	3	0	1	15	5.5294	252	0	0	.	0	27.5	10	24	0	0
40	13	2	0.25	.	.	.	.	10	0	2	15	4.8858	132.39	0	0	.	0	27.5	10	24	0	0
40	13	2	0.25	.	.	.	.	3	0	1	18	5.5134	248	0	0	.	0	27.5	10	24	0	0
40	13	2	0.25	.	.	.	.	10	0	2	18	4.4548	86.04	0	0	.	0	27.5	10	24	0	0
40	13	2	0.25	.	.	.	.	3	0	1	21	5.4723	238	0	0	.	0	27.5	10	24	0	0
40	13	2	0.25	.	.	.	.	10	0	2	21	4.4208	83.16	0	0	.	0	27.5	10	24	0	0
40	13	2	0.25	.	.	.	.	3	0	1	24	6.0591	428	0	0	.	0	27.5	10	24	0	0
40	13	2	0.25	.	.	.	.	10	0	2	24	4.4875	88.9	0	0	.	0	27.5	10	24	0	0
41	14	2	0.25	166.2	166200	6.925	6925	1	1	0	0	-1	-1	1	0	.	0	26.5	10	24	0	0
41	14	2	0.25	170.4	170400	7.1	7100	2	1	0	0	-1	-1	1	0	.	0	26.5	10	24	0	0
41	14	2	0.25	.	.	.	.	3	0	1	0	5.6275	277.97	0	0	.	0	26.5	10	24	0	0
41	14	2	0.25	.	.	.	.	10	0	2	0	3.9034	49.57	0	0	.	0	26.5	10	24	0	0
41	14	2	0.25	.	.	.	.	3	0	1	3	8.349	4226	0	0	.	0	26.5	10	24	0	0
41	14	2	0.25	.	.	.	.	10	0	2	3	7.3602	1572.18	0	0	.	0	26.5	10	24	0	0
41	14	2	0.25	.	.	.	.	3	0	1	6	8.0104	3012	0	0	.	0	26.5	10	24	0	0
41	14	2	0.25	.	.	.	.	10	0	2	6	7.2153	1360.07	0	0	.	0	26.5	10	24	0	0
41	14	2	0.25	.	.	.	.	3	0	1	9	7.5517	1904	0	0	.	0	26.5	10	24	0	0
41	14	2	0.25	.	.	.	.	10	0	2	9	6.7224	830.8	0	0	.	0	26.5	10	24	0	0
41	14	2	0.25	.	.	.	.	3	0	1	12	7.1229	1240	0	0	.	0	26.5	10	24	0	0
41	14	2	0.25	.	.	.	.	10	0	2	12	5.9496	383.6	0	0	.	0	26.5	10	24	0	0
41	14	2	0.25	.	.	.	.	3	0	1	15	6.4892	658	0	0	.	0	26.5	10	24	0	0
41	14	2	0.25	.	.	.	.	10	0	2	15	5.4778	239.31	0	0	.	0	26.5	10	24	0	0
41	14	2	0.25	.	.	.	.	3	0	1	18	6.4329	622	0	0	.	0	26.5	10	24	0	0
41	14	2	0.25	.	.	.	.	10	0	2	18	5.1941	180.21	0	0	.	0	26.5	10	24	0	0
41	14	2	0.25	.	.	.	.	3	0	1	21	6.2804	534	0	0	.	0	26.5	10	24	0	0
41	14	2	0.25	.	.	.	.	10	0	2	21	5.0132	150.38	0	0	.	0	26.5	10	24	0	0
41	14	2	0.25	.	.	.	.	3	0	1	24	6.2804	534	0	0	.	0	26.5	10	24	0	0
41	14	2	0.25	.	.	.	.	10	0	2	24	4.961	142.73	0	0	.	0	26.5	10	24	0	0
42	15	2	0.25	153.6	153600	6.4	6400	1	1	0	0	-1	-1	1	0	.	0	31.4	10	24	0	0
42	15	2	0.25	166.2	166200	6.925	6925	2	1	0	0	-1	-1	1	0	.	0	31.4	10	24	0	0
42	15	2	0.25	.	.	.	.	3	0	1	0	5.1486	172.19	0	0	.	0	31.4	10	24	0	0
42	15	2	0.25	.	.	.	.	10	0	2	0	3.6773	39.54	0	0	.	0	31.4	10	24	0	0
42	15	2	0.25	.	.	.	.	3	0	1	3	8.4407	4632	0	0	.	0	31.4	10	24	0	0
42	15	2	0.25	.	.	.	.	10	0	2	3	5.8324	341.17	0	0	.	0	31.4	10	24	0	0
42	15	2	0.25	.	.	.	.	3	0	1	6	6.8565	950	0	0	.	0	31.4	10	24	0	0
42	15	2	0.25	.	.	.	.	10	0	2	6	5.5245	250.75	0	0	.	0	31.4	10	24	0	0
42	15	2	0.25	.	.	.	.	3	0	1	9	6.2879	538	0	0	.	0	31.4	10	24	0	0
42	15	2	0.25	.	.	.	.	10	0	2	9	5.0463	155.44	0	0	.	0	31.4	10	24	0	0
42	15	2	0.25	.	.	.	.	3	0	1	12	6.1738	480	0	0	.	0	31.4	10	24	0	0
42	15	2	0.25	.	.	.	.	10	0	2	12	4.9052	134.99	0	0	.	0	31.4	10	24	0	0
42	15	2	0.25	.	.	.	.	3	0	1	15	6.0684	432	0	0	.	0	31.4	10	24	0	0
42	15	2	0.25	.	.	.	.	10	0	2	15	4.7808	119.2	0	0	.	0	31.4	10	24	0	0
42	15	2	0.25	.	.	.	.	3	0	1	18	5.2983	200	0	0	.	0	31.4	10	24	0	0
42	15	2	0.25	.	.	.	.	10	0	2	18	4.6639	106.05	0	0	.	0	31.4	10	24	0	0
42	15	2	0.25	.	.	.	.	3	0	1	21	5.0499	156	0	0	.	0	31.4	10	24	0	0
42	15	2	0.25	.	.	.	.	10	0	2	21	4.0993	60.3	0	0	.	0	31.4	10	24	0	0
42	15	2	0.25	.	.	.	.	3	0	1	24	5.037	154	0	0	.	0	31.4	10	24	0	0
42	15	2	0.25	.	.	.	.	10	0	2	24	4.4653	86.95	0	0	.	0	31.4	10	24	0	0
43	16	2	0.25	187.2	187200	7.8	7800	1	1	0	0	-1	-1	1	0	.	0	27	10	24	0	0
43	16	2	0.25	178.8	178800	7.45	7450	2	1	0	0	-1	-1	1	0	.	0	27	10	24	0	0
43	16	2	0.25	.	.	.	.	3	0	1	0	6.0627	429.54	0	0	.	0	27	10	24	0	0
43	16	2	0.25	.	.	.	.	10	0	2	0	4.5232	92.13	0	0	.	0	27	10	24	0	0
43	16	2	0.25	.	.	.	.	3	0	1	3	8.4251	4560	0	0	.	0	27	10	24	0	0
43	16	2	0.25	.	.	.	.	10	0	2	3	6.9819	1076.94	0	0	.	0	27	10	24	0	0
43	16	2	0.25	.	.	.	.	3	0	1	6	7.0665	1172	0	0	.	0	27	10	24	0	0
43	16	2	0.25	.	.	.	.	10	0	2	6	6.6957	808.93	0	0	.	0	27	10	24	0	0
43	16	2	0.25	.	.	.	.	3	0	1	9	6.7262	834	0	0	.	0	27	10	24	0	0
43	16	2	0.25	.	.	.	.	10	0	2	9	5.7239	306.1	0	0	.	0	27	10	24	0	0
43	16	2	0.25	.	.	.	.	3	0	1	12	6.4831	654	0	0	.	0	27	10	24	0	0
43	16	2	0.25	.	.	.	.	10	0	2	12	5.284	197.16	0	0	.	0	27	10	24	0	0
43	16	2	0.25	.	.	.	.	3	0	1	15	6.1985	492	0	0	.	0	27	10	24	0	0
43	16	2	0.25	.	.	.	.	10	0	2	15	4.9713	144.21	0	0	.	0	27	10	24	0	0
43	16	2	0.25	.	.	.	.	3	0	1	18	6.2989	544	0	0	.	0	27	10	24	0	0
43	16	2	0.25	.	.	.	.	10	0	2	18	5.0128	150.33	0	0	.	0	27	10	24	0	0
43	16	2	0.25	.	.	.	.	3	0	1	21	5.6904	296	0	0	.	0	27	10	24	0	0
43	16	2	0.25	.	.	.	.	10	0	2	21	4.7789	118.97	0	0	.	0	27	10	24	0	0
43	16	2	0.25	.	.	.	.	3	0	1	24	5.5984	270	0	0	.	0	27	10	24	0	0
43	16	2	0.25	.	.	.	.	10	0	2	24	5.2245	185.76	0	0	.	0	27	10	24	0	0
44	17	2	0.25	171	171000	7.125	7125	1	1	0	0	-1	-1	1	0	.	0	27.7	10	24	0	0
44	17	2	0.25	165	165000	6.875	6875	2	1	0	0	-1	-1	1	0	.	0	27.7	10	24	0	0
44	17	2	0.25	.	.	.	.	3	0	1	0	5.6897	295.8	0	0	.	0	27.7	10	24	0	0
44	17	2	0.25	.	.	.	.	10	0	2	0	4.4346	84.32	0	0	.	0	27.7	10	24	0	0
44	17	2	0.25	.	.	.	.	3	0	1	3	7.6128	2024	0	0	.	0	27.7	10	24	0	0
44	17	2	0.25	.	.	.	.	10	0	2	3	5.9722	392.36	0	0	.	0	27.7	10	24	0	0
44	17	2	0.25	.	.	.	.	3	0	1	6	7.0665	1172	0	0	.	0	27.7	10	24	0	0
44	17	2	0.25	.	.	.	.	10	0	2	6	5.9013	365.53	0	0	.	0	27.7	10	24	0	0
44	17	2	0.25	.	.	.	.	3	0	1	9	6.7476	852	0	0	.	0	27.7	10	24	0	0
44	17	2	0.25	.	.	.	.	10	0	2	9	5.6685	289.6	0	0	.	0	27.7	10	24	0	0
44	17	2	0.25	.	.	.	.	3	0	1	12	6.1485	468	0	0	.	0	27.7	10	24	0	0
44	17	2	0.25	.	.	.	.	10	0	2	12	4.7673	117.6	0	0	.	0	27.7	10	24	0	0
44	17	2	0.25	.	.	.	.	3	0	1	15	6.3279	560	0	0	.	0	27.7	10	24	0	0
44	17	2	0.25	.	.	.	.	10	0	2	15	5.2064	182.44	0	0	.	0	27.7	10	24	0	0
44	17	2	0.25	.	.	.	.	3	0	1	18	6.1048	448	0	0	.	0	27.7	10	24	0	0
44	17	2	0.25	.	.	.	.	10	0	2	18	4.7673	117.6	0	0	.	0	27.7	10	24	0	0
44	17	2	0.25	.	.	.	.	3	0	1	21	6.612	744	0	0	.	0	27.7	10	24	0	0
44	17	2	0.25	.	.	.	.	10	0	2	21	7.0742	1181.1	0	1	.	0	27.7	10	24	0	0
44	17	2	0.25	.	.	.	.	3	0	1	24	6.1654	476	0	0	.	0	27.7	10	24	0	0
44	17	2	0.25	.	.	.	.	10	0	2	24	4.9135	136.12	0	0	.	0	27.7	10	24	0	0
45	18	2	0.25	159	159000	6.625	6625	1	1	0	0	-1	-1	1	0	.	0	27	10	24	0	0
45	18	2	0.25	188.4	188400	7.85	7850	2	1	0	0	-1	-1	1	0	.	0	27	10	24	0	0
45	18	2	0.25	.	.	.	.	3	0	1	0	6.3597	578.1	0	0	.	0	27	10	24	0	0
45	18	2	0.25	.	.	.	.	10	0	2	0	6.3127	551.52	0	1	.	0	27	10	24	0	0
45	18	2	0.25	.	.	.	.	3	0	1	3	7.4313	1688	0	0	.	0	27	10	24	0	0
45	18	2	0.25	.	.	.	.	10	0	2	3	5.3973	220.8	0	0	.	0	27	10	24	0	0
45	18	2	0.25	.	.	.	.	3	0	1	6	6.9117	1004	0	0	.	0	27	10	24	0	0
45	18	2	0.25	.	.	.	.	10	0	2	6	6.1284	458.69	0	0	.	0	27	10	24	0	0
45	18	2	0.25	.	.	.	.	3	0	1	9	6.5453	696	0	0	.	0	27	10	24	0	0
45	18	2	0.25	.	.	.	.	10	0	2	9	5.7499	314.15	0	0	.	0	27	10	24	0	0
45	18	2	0.25	.	.	.	.	3	0	1	12	6.3869	594	0	0	.	0	27	10	24	0	0
45	18	2	0.25	.	.	.	.	10	0	2	12	5.9665	390.15	0	0	.	0	27	10	24	0	0
45	18	2	0.25	.	.	.	.	3	0	1	15	6.2538	520	0	0	.	0	27	10	24	0	0
45	18	2	0.25	.	.	.	.	10	0	2	15	5.8889	360.99	0	0	.	0	27	10	24	0	0
45	18	2	0.25	.	.	.	.	3	0	1	18	6.1612	474	0	0	.	0	27	10	24	0	0
45	18	2	0.25	.	.	.	.	10	0	2	18	5.8566	349.52	0	0	.	0	27	10	24	0	0
45	18	2	0.25	.	.	.	.	3	0	1	21	5.9402	380	0	0	.	0	27	10	24	0	0
45	18	2	0.25	.	.	.	.	10	0	2	21	5.6598	287.1	0	0	.	0	27	10	24	0	0
45	18	2	0.25	.	.	.	.	3	0	1	24	5.717	304	0	0	.	0	27	10	24	0	0
45	18	2	0.25	.	.	.	.	10	0	2	24	5.2555	191.61	0	0	.	0	27	10	24	0	0
46	19	2	0	1.00E-05	1.00E-05	.	.	1	1	0	0	-1	-1	1	0	.	0	28.7	10	24	0	0
46	19	2	0	1.00E-05	1.00E-05	.	.	2	1	0	0	-1	-1	1	0	.	0	28.7	10	24	0	0
46	19	2	0	.	.	.	.	3	0	1	0	5.7334	309.03	0	0	.	0	28.7	10	24	0	0
46	19	2	0	.	.	.	.	10	0	2	0	-2	-2	1	0	.	0	28.7	10	24	0	0
46	19	2	0	.	.	.	.	3	0	1	3	5.8021	331	0	0	.	0	28.7	10	24	0	0
46	19	2	0	.	.	.	.	10	0	2	3	-2	-2	1	0	.	0	28.7	10	24	0	0
46	19	2	0	.	.	.	.	3	0	1	6	5.7777	323	0	0	.	0	28.7	10	24	0	0
46	19	2	0	.	.	.	.	10	0	2	6	-2	-2	1	0	.	0	28.7	10	24	0	0
46	19	2	0	.	.	.	.	3	0	1	9	5.6595	287	0	0	.	0	28.7	10	24	0	0
46	19	2	0	.	.	.	.	10	0	2	9	-2	-2	1	0	.	0	28.7	10	24	0	0
46	19	2	0	.	.	.	.	3	0	1	12	5.6664	289	0	0	.	0	28.7	10	24	0	0
46	19	2	0	.	.	.	.	10	0	2	12	-2	-2	1	0	.	0	28.7	10	24	0	0
46	19	2	0	.	.	.	.	3	0	1	15	5.5607	260	0	0	.	0	28.7	10	24	0	0
46	19	2	0	.	.	.	.	10	0	2	15	-2	-2	1	0	.	0	28.7	10	24	0	0
46	19	2	0	.	.	.	.	3	0	1	18	5.5134	248	0	0	.	0	28.7	10	24	0	0
46	19	2	0	.	.	.	.	10	0	2	18	-2	-2	1	0	.	0	28.7	10	24	0	0
46	19	2	0	.	.	.	.	3	0	1	21	5.5835	266	0	0	.	0	28.7	10	24	0	0
46	19	2	0	.	.	.	.	10	0	2	21	-2	-2	1	0	.	0	28.7	10	24	0	0
46	19	2	0	.	.	.	.	3	0	1	24	5.4889	242	0	0	.	0	28.7	10	24	0	0
46	19	2	0	.	.	.	.	10	0	2	24	-2	-2	1	0	.	0	28.7	10	24	0	0
47	20	2	0	1.00E-05	1.00E-05	.	.	1	1	0	0	-1	-1	1	0	.	0	28.7	10	24	0	0
47	20	2	0	1.00E-05	1.00E-05	.	.	2	1	0	0	-1	-1	1	0	.	0	28.7	10	24	0	0
47	20	2	0	.	.	.	.	3	0	1	0	5.4548	233.88	0	0	.	0	28.7	10	24	0	0
47	20	2	0	.	.	.	.	10	0	2	0	4.8654	129.72	0	0	.	0	28.7	10	24	0	0
47	20	2	0	.	.	.	.	3	0	1	3	5.8693	354	0	0	.	0	28.7	10	24	0	0
47	20	2	0	.	.	.	.	10	0	2	3	5.2854	197.44	0	0	.	0	28.7	10	24	0	0
47	20	2	0	.	.	.	.	3	0	1	6	6.2729	530	0	0	.	0	28.7	10	24	0	0
47	20	2	0	.	.	.	.	10	0	2	6	5.838	343.1	0	0	.	0	28.7	10	24	0	0
47	20	2	0	.	.	.	.	3	0	1	9	6.1696	478	0	0	.	0	28.7	10	24	0	0
47	20	2	0	.	.	.	.	10	0	2	9	6.4488	631.95	0	0	.	0	28.7	10	24	0	0
47	20	2	0	.	.	.	.	3	0	1	12	6.1137	452	0	0	.	0	28.7	10	24	0	0
47	20	2	0	.	.	.	.	10	0	2	12	6.2005	493.01	0	0	.	0	28.7	10	24	0	0
47	20	2	0	.	.	.	.	3	0	1	15	6.021	412	0	0	.	0	28.7	10	24	0	0
47	20	2	0	.	.	.	.	10	0	2	15	6.1629	474.78	0	0	.	0	28.7	10	24	0	0
47	20	2	0	.	.	.	.	3	0	1	18	5.5215	250	0	0	.	0	28.7	10	24	0	0
47	20	2	0	.	.	.	.	10	0	2	18	5.939	379.57	0	0	.	0	28.7	10	24	0	0
47	20	2	0	.	.	.	.	3	0	1	21	5.6058	272	0	0	.	0	28.7	10	24	0	0
47	20	2	0	.	.	.	.	10	0	2	21	5.2279	186.4	0	0	.	0	28.7	10	24	0	0
47	20	2	0	.	.	.	.	3	0	1	24	5.649	284	0	0	.	0	28.7	10	24	0	0
47	20	2	0	.	.	.	.	10	0	2	24	6.0257	413.93	0	0	.	0	28.7	10	24	0	0
48	21	2	0	1.00E-05	1.00E-05	.	.	1	1	0	0	-1	-1	1	0	.	0	28.7	10	24	0	0
48	21	2	0	1.00E-05	1.00E-05	.	.	2	1	0	0	-1	-1	1	0	.	0	28.7	10	24	0	0
48	21	2	0	.	.	.	.	3	0	1	0	5.6413	281.84	0	0	.	0	28.7	10	24	0	0
48	21	2	0	.	.	.	.	10	0	2	0	5.2269	186.21	0	0	.	0	28.7	10	24	0	0
48	21	2	0	.	.	.	.	3	0	1	3	5.663	288	0	0	.	0	28.7	10	24	0	0
48	21	2	0	.	.	.	.	10	0	2	3	4.3814	79.95	0	0	.	0	28.7	10	24	0	0
48	21	2	0	.	.	.	.	3	0	1	6	5.6419	282	0	0	.	0	28.7	10	24	0	0
48	21	2	0	.	.	.	.	10	0	2	6	5.8489	346.86	0	0	.	0	28.7	10	24	0	0
48	21	2	0	.	.	.	.	3	0	1	9	5.717	304	0	0	.	0	28.7	10	24	0	0
48	21	2	0	.	.	.	.	10	0	2	9	6.3118	551.06	0	0	.	0	28.7	10	24	0	0
48	21	2	0	.	.	.	.	3	0	1	12	5.5452	256	0	0	.	0	28.7	10	24	0	0
48	21	2	0	.	.	.	.	10	0	2	12	5.1643	174.91	0	0	.	0	28.7	10	24	0	0
48	21	2	0	.	.	.	.	3	0	1	15	5.6276	278	0	0	.	0	28.7	10	24	0	0
48	21	2	0	.	.	.	.	10	0	2	15	5.7431	312.04	0	0	.	0	28.7	10	24	0	0
48	21	2	0	.	.	.	.	3	0	1	18	5.649	284	0	0	.	0	28.7	10	24	0	0
48	21	2	0	.	.	.	.	10	0	2	18	5.1969	180.71	0	0	.	0	28.7	10	24	0	0
48	21	2	0	.	.	.	.	3	0	1	21	5.4638	236	0	0	.	0	28.7	10	24	0	0
48	21	2	0	.	.	.	.	10	0	2	21	5.2279	186.4	0	0	.	0	28.7	10	24	0	0
48	21	2	0	.	.	.	.	3	0	1	24	5.0999	164	0	0	.	0	28.7	10	24	0	0
48	21	2	0	.	.	.	.	10	0	2	24	4.8079	122.47	0	0	.	0	28.7	10	24	0	0
49	1	3	0	1.00E-05	1.00E-05	.	.	1	1	0	0	-1	-1	1	0	.	0	24.6	30	6	0	0
49	1	3	0	1.00E-05	1.00E-05	.	.	2	1	0	0	-1	-1	1	0	.	0	24.6	30	6	0	0
49	1	3	0	.	.	.	.	1	0	0	0	5.0752	160	0	0	.	0	24.6	30	6	0	0
49	1	3	0	.	.	.	.	3	0	1	0	1.6094	5	0	0	10	1	24.6	30	6	0	0
49	1	3	0	.	.	.	.	10	0	2	0	1.6094	5	0	0	10	1	24.6	30	6	0	0
49	1	3	0	.	.	.	.	3	0	1	1	1.6094	5	0	0	10	1	24.6	30	6	0	0
49	1	3	0	.	.	.	.	10	0	2	1	1.6094	5	0	0	10	1	24.6	30	6	0	0
49	1	3	0	.	.	.	.	1	0	0	2	4.8675	130	0	0	.	0	24.6	30	6	0	0
49	1	3	0	.	.	.	.	3	0	1	2	1.6094	5	0	0	10	1	24.6	30	6	0	0
49	1	3	0	.	.	.	.	10	0	2	2	1.6094	5	0	0	10	1	24.6	30	6	0	0
49	1	3	0	.	.	.	.	3	0	1	3	1.6094	5	0	0	10	1	24.6	30	6	0	0
49	1	3	0	.	.	.	.	10	0	2	3	1.6094	5	0	0	10	1	24.6	30	6	0	0
49	1	3	0	.	.	.	.	1	0	0	4	4.7875	120	0	0	.	0	24.6	30	6	0	0
49	1	3	0	.	.	.	.	3	0	1	4	1.6094	5	0	0	10	1	24.6	30	6	0	0
49	1	3	0	.	.	.	.	10	0	2	4	1.6094	5	0	0	10	1	24.6	30	6	0	0
49	1	3	0	.	.	.	.	3	0	1	5	1.6094	5	0	0	10	1	24.6	30	6	0	0
49	1	3	0	.	.	.	.	10	0	2	5	2.6967	14.83	0	0	10	0	24.6	30	6	0	0
49	1	3	0	.	.	.	.	1	0	0	6	5.0106	150	0	0	.	0	24.6	30	6	0	0
49	1	3	0	.	.	.	.	3	0	1	6	1.6094	5	0	0	10	1	24.6	30	6	0	0
49	1	3	0	.	.	.	.	10	0	2	6	3.1263	22.79	0	0	10	0	24.6	30	6	0	0
50	2	3	0	1.00E-05	1.00E-05	.	.	1	1	0	0	-1	-1	1	0	.	0	26.2	30	6	0	0
50	2	3	0	1.00E-05	1.00E-05	.	.	2	1	0	0	-1	-1	1	0	.	0	26.2	30	6	0	0
50	2	3	0	.	.	.	.	1	0	0	0	7.7363	2290	0	0	.	0	26.2	30	6	0	0
50	2	3	0	.	.	.	.	3	0	1	0	1.6094	5	0	0	10	1	26.2	30	6	0	0
50	2	3	0	.	.	.	.	10	0	2	0	1.6094	5	0	0	10	1	26.2	30	6	0	0
50	2	3	0	.	.	.	.	3	0	1	1	1.6094	5	0	0	10	1	26.2	30	6	0	0
50	2	3	0	.	.	.	.	10	0	2	1	1.6094	5	0	0	10	1	26.2	30	6	0	0
50	2	3	0	.	.	.	.	1	0	0	2	6.1312	460	0	0	.	0	26.2	30	6	0	0
50	2	3	0	.	.	.	.	3	0	1	2	1.6094	5	0	0	10	1	26.2	30	6	0	0
50	2	3	0	.	.	.	.	10	0	2	2	1.6094	5	0	0	10	1	26.2	30	6	0	0
50	2	3	0	.	.	.	.	3	0	1	3	1.6094	5	0	0	10	1	26.2	30	6	0	0
50	2	3	0	.	.	.	.	10	0	2	3	3.3354	28.09	0	0	10	0	26.2	30	6	0	0
50	2	3	0	.	.	.	.	1	0	0	4	6.3456	570	0	0	.	0	26.2	30	6	0	0
50	2	3	0	.	.	.	.	3	0	1	4	1.6094	5	0	0	10	1	26.2	30	6	0	0
50	2	3	0	.	.	.	.	10	0	2	4	2.8854	17.91	0	0	10	0	26.2	30	6	0	0
50	2	3	0	.	.	.	.	3	0	1	5	1.6094	5	0	0	10	1	26.2	30	6	0	0
50	2	3	0	.	.	.	.	10	0	2	5	2.9349	18.82	0	0	10	0	26.2	30	6	0	0
50	2	3	0	.	.	.	.	1	0	0	6	6.2538	520	0	0	.	0	26.2	30	6	0	0
50	2	3	0	.	.	.	.	3	0	1	6	1.6094	5	0	0	10	1	26.2	30	6	0	0
50	2	3	0	.	.	.	.	10	0	2	6	3.1135	22.5	0	0	10	0	26.2	30	6	0	0
51	3	3	0	1.00E-05	1.00E-05	.	.	1	1	0	0	-1	-1	1	0	.	0	27.4	30	6	0	0
51	3	3	0	1.00E-05	1.00E-05	.	.	2	1	0	0	-1	-1	1	0	.	0	27.4	30	6	0	0
51	3	3	0	.	.	.	.	1	0	0	0	6.0868	440	0	0	.	0	27.4	30	6	0	0
51	3	3	0	.	.	.	.	3	0	1	0	1.6094	5	0	0	10	1	27.4	30	6	0	0
51	3	3	0	.	.	.	.	10	0	2	0	1.6094	5	0	0	10	1	27.4	30	6	0	0
51	3	3	0	.	.	.	.	3	0	1	1	1.6094	5	0	0	10	1	27.4	30	6	0	0
51	3	3	0	.	.	.	.	10	0	2	1	2.8898	17.99	0	0	10	0	27.4	30	6	0	0
51	3	3	0	.	.	.	.	1	0	0	2	4.7875	120	0	0	.	0	27.4	30	6	0	0
51	3	3	0	.	.	.	.	3	0	1	2	1.6094	5	0	0	10	1	27.4	30	6	0	0
51	3	3	0	.	.	.	.	10	0	2	2	1.6094	5	0	0	10	1	27.4	30	6	0	0
51	3	3	0	.	.	.	.	3	0	1	3	1.6094	5	0	0	10	1	27.4	30	6	0	0
51	3	3	0	.	.	.	.	10	0	2	3	1.6094	5	0	0	10	1	27.4	30	6	0	0
51	3	3	0	.	.	.	.	1	0	0	4	4.0943	60	0	0	.	0	27.4	30	6	0	0
51	3	3	0	.	.	.	.	3	0	1	4	1.6094	5	0	0	10	1	27.4	30	6	0	0
51	3	3	0	.	.	.	.	10	0	2	4	1.6094	5	0	0	10	1	27.4	30	6	0	0
51	3	3	0	.	.	.	.	3	0	1	5	1.6094	5	0	0	10	1	27.4	30	6	0	0
51	3	3	0	.	.	.	.	10	0	2	5	1.6094	5	0	0	10	1	27.4	30	6	0	0
51	3	3	0	.	.	.	.	1	0	0	6	4.0943	60	0	0	.	0	27.4	30	6	0	0
51	3	3	0	.	.	.	.	3	0	1	6	1.6094	5	0	0	10	1	27.4	30	6	0	0
51	3	3	0	.	.	.	.	10	0	2	6	1.6094	5	0	0	10	1	27.4	30	6	0	0
52	4	3	0.063	10.13	30390	1.688	5064	1	1	0	0	-1	-1	1	0	.	0	26.8	30	6	0	0
52	4	3	0.063	10.13	30390	1.688	5064	2	1	0	0	-1	-1	1	0	.	0	26.8	30	6	0	0
52	4	3	0.063	.	.	.	.	1	0	0	0	4.7875	120	0	0	.	0	26.8	30	6	0	0
52	4	3	0.063	.	.	.	.	3	0	1	0	1.6094	5	0	0	10	1	26.8	30	6	0	0
52	4	3	0.063	.	.	.	.	10	0	2	0	1.6094	5	0	0	10	1	26.8	30	6	0	0
52	4	3	0.063	.	.	.	.	3	0	1	1	3.9279	50.8	0	0	10	0	26.8	30	6	0	0
52	4	3	0.063	.	.	.	.	10	0	2	1	1.6094	5	0	0	10	1	26.8	30	6	0	0
52	4	3	0.063	.	.	.	.	1	0	0	2	6.0403	420	0	0	.	0	26.8	30	6	0	0
52	4	3	0.063	.	.	.	.	3	0	1	2	4.7741	118.4	0	0	10	0	26.8	30	6	0	0
52	4	3	0.063	.	.	.	.	10	0	2	2	5.3078	201.91	0	0	10	0	26.8	30	6	0	0
52	4	3	0.063	.	.	.	.	3	0	1	3	1.6094	5	0	0	10	1	26.8	30	6	0	0
52	4	3	0.063	.	.	.	.	10	0	2	3	4.9883	146.69	0	0	10	0	26.8	30	6	0	0
52	4	3	0.063	.	.	.	.	1	0	0	4	6.2916	540	0	0	.	0	26.8	30	6	0	0
52	4	3	0.063	.	.	.	.	3	0	1	4	1.6094	5	0	0	10	1	26.8	30	6	0	0
52	4	3	0.063	.	.	.	.	10	0	2	4	4.4516	85.76	0	0	10	0	26.8	30	6	0	0
52	4	3	0.063	.	.	.	.	3	0	1	5	1.6094	5	0	0	10	1	26.8	30	6	0	0
52	4	3	0.063	.	.	.	.	10	0	2	5	4.4208	83.16	0	0	10	0	26.8	30	6	0	0
52	4	3	0.063	.	.	.	.	1	0	0	6	6.4922	660	0	0	.	0	26.8	30	6	0	0
52	4	3	0.063	.	.	.	.	3	0	1	6	1.6094	5	0	0	10	1	26.8	30	6	0	0
52	4	3	0.063	.	.	.	.	10	0	2	6	3.4452	31.35	0	0	10	0	26.8	30	6	0	0
53	5	3	0.063	10.85	32550	1.808	5424	1	1	0	0	-1	-1	1	0	.	0	28.7	30	6	0	0
53	5	3	0.063	10.85	32550	1.808	5424	2	1	0	0	-1	-1	1	0	.	0	28.7	30	6	0	0
53	5	3	0.063	.	.	.	.	1	0	0	0	4.0943	60	0	0	.	0	28.7	30	6	0	0
53	5	3	0.063	.	.	.	.	3	0	1	0	1.6094	5	0	0	10	1	28.7	30	6	0	0
53	5	3	0.063	.	.	.	.	10	0	2	0	1.6094	5	0	0	10	1	28.7	30	6	0	0
53	5	3	0.063	.	.	.	.	3	0	1	1	3.6914	40.1	0	0	10	0	28.7	30	6	0	0
53	5	3	0.063	.	.	.	.	10	0	2	1	1.6094	5	0	0	10	1	28.7	30	6	0	0
53	5	3	0.063	.	.	.	.	1	0	0	2	4.4998	90	0	0	.	0	28.7	30	6	0	0
53	5	3	0.063	.	.	.	.	3	0	1	2	3.6964	40.3	0	0	10	0	28.7	30	6	0	0
53	5	3	0.063	.	.	.	.	10	0	2	2	5.7121	302.5	0	0	10	0	28.7	30	6	0	0
53	5	3	0.063	.	.	.	.	3	0	1	3	1.6094	5	0	0	10	1	28.7	30	6	0	0
53	5	3	0.063	.	.	.	.	10	0	2	3	4.9356	139.16	0	0	10	0	28.7	30	6	0	0
53	5	3	0.063	.	.	.	.	1	0	0	4	4.7875	120	0	0	.	0	28.7	30	6	0	0
53	5	3	0.063	.	.	.	.	3	0	1	4	1.6094	5	0	0	10	1	28.7	30	6	0	0
53	5	3	0.063	.	.	.	.	10	0	2	4	4.373	79.28	0	0	10	0	28.7	30	6	0	0
53	5	3	0.063	.	.	.	.	3	0	1	5	1.6094	5	0	0	10	1	28.7	30	6	0	0
53	5	3	0.063	.	.	.	.	10	0	2	5	3.9984	54.51	0	0	10	0	28.7	30	6	0	0
53	5	3	0.063	.	.	.	.	1	0	0	6	4.8675	130	0	0	.	0	28.7	30	6	0	0
53	5	3	0.063	.	.	.	.	3	0	1	6	1.6094	5	0	0	10	1	28.7	30	6	0	0
53	5	3	0.063	.	.	.	.	10	0	2	6	3.5868	36.12	0	0	10	0	28.7	30	6	0	0
54	6	3	0.063	9.64	28920	1.606	4818	1	1	0	0	-1	-1	1	0	.	0	25.5	30	6	0	0
54	6	3	0.063	9.64	28920	1.606	4818	2	1	0	0	-1	-1	1	0	.	0	25.5	30	6	0	0
54	6	3	0.063	.	.	.	.	1	0	0	0	3.4012	30	0	0	.	0	25.5	30	6	0	0
[truncated: 1,339 more rows]
